# Supplementary material for: PeRL: A Circum-Arctic Permafrost Region Pond and Lake Database
Source: Copernicus journal article supplement (doi:10.5194/essd-2016-56), 2016-11-22
Supplement: Supplementary file [file essd-2016-56-AC1-supplement.pdf]

## **Reply to Reviewer #1**

### **Interactive comments on “PeRL: A Circum-Arctic Permafrost Region Pond and Lake Database” by Sina Muster et al.**

**We sincerely thank the reviewer for his/her positive and constructive comments on our manuscript.**

**Our responses to the reviewer’s comments are highlighted in bold.**

***Changes done in the manuscript are marked in italic.***

**Page and line numbers refer to the marked-up manuscript version which is attached to this review as well as the new supplement.**

#### **Anonymous Referee #1**

Received and published: 10 February 2017

This manuscript describes a database (PeRL) that maps ponds and lakes for the Circum-Arctic Permafrost region. The authors provide detailed information on the generation of the database, how images were processed and classified. Additionally, they discuss classification accuracy and uncertainty as well as the potential use of the database.

This database is a very valuable contribution to the scientific community as well as potential stakeholders from outside science. As the authors describe, classifying the area of waterbodies in the Arctic is crucial, as it impacts permafrost degradation and carbon fluxes of permafrost lowlands. The introduction is very well written and delivers the right message on why this database is useful. The second chapter defines ponds and lakes, which I thought was really useful, since I usually don’t think about lakes and ponds, and chapter three explained the study areas. Up to this point I could easily follow the manuscript and I don’t have any major comments. Chapter four deals with the generation of the PeRL database and because image processing or classification are not my expertise I cannot comment much on the correctness of the methods. However, I would like to comment on the understandability of this section of the manuscript. I got completely lost in all the technical details and had a hard time staying focused. I understand that technical details have to be provided but I would suggest to refine the language to the extent that a non-expert can understand it. Ultimately, you want this database to be useful to a large audience and the user of this database may not be the expert for all the technical details.

**We agree with the reviewer that there is a lot of technical detail in the manuscript that makes it at times hard to follow. We have therefore restructured the manuscript by moving some of the more technical descriptions and information into a supplement. We have also revised the overall language to address some technical issues in simpler language or added explanations for more clarity.**

**Parts of the manuscript that were moved to the supplement include**

- Processing of TSX imagery
- Selection of box size for subgrid sampling
- Description of original permafrost landscape maps
- Metadata on image processing and classification

In addition, we have also adapted the tables with metadata information. Some information is immediately relevant to all users such as accuracy, available classes (open water, overgrown water), map extent, acquisition date and whether the data includes only waterbodies or also streams and rivers. We have therefore rearranged this information in a new table which is shown in the main part of the manuscript (Table 1). We find the paper is now easier to read for the average user; however all the supplement provides detailed technical information is available for the interested expert and ensures a full characterization of the image and data processing.

Besides having a hard time with the technical part of this manuscript, I could not follow what the benefits of the statistical analyses for all waterbodies are or even why they were performed. Was that explained somewhere and I missed it?

**We have revised section 4 to better explain the motive for the statistical analysis [page 7, lines 1-17]**

***Statistics such as areal fraction of water or average waterbody surface area are meaningful measures to compare waterbody distributions between individual study areas and permafrost landscapes.*** Statistics were calculated for all waterbodies, as well as separately for ponds and lakes. We calculated areal fraction, i.e., the area fraction of water relative to land (the total mapped area), waterbody density, i.e. the number of waterbodies per km<sup>2</sup>, and mean, median, and standard deviation of surface area for each site using the software package R version 3.3.1. ***However, statistics are subject to the size of the study area. Very small study areas may not capture larger waterbodies which may nonetheless be characteristic of the larger landscape. Very large study areas, on the other hand, may show more spatial variation in waterbody distribution than smaller study areas. In order to make statistics comparable between study areas, we subdivided larger study areas into boxes of 10x10 km.***

Then, section 4.6.1-4.6.3 explains permafrost landscape maps for Alaska, Canada, and Russia (Table 2) but I couldn't find details for Europe. Are there none available? There are a few study areas in Scandinavia (Figure. 1) and so I would have assumed to read something about Europe as well. This is probably an easy fix but it should be addressed.

**We have added an explanation [page 9, lines 23-24]**

***Extrapolations were done in Alaska, Canada and Russia for waterbody maps with a (combined) extent of 100 km<sup>2</sup> or larger, but not for Europe where available waterbody maps were too small.***

One questions that I had that I couldn't quite figure out from the manuscript is whether wetlands can falsely be classified as ponds or lakes, depending on precipitation and other factors, some areas might be really wet in some years and could get misinterpreted as ponds although they

aren't real ponds. There is some text about that on page 18, line 13ff but it would be good to address this in the manuscript in more detail.

**This is an important question that we now discuss in more detail [page 21, lines 16-24]**

***Seasonal processes, such as snowmelt, progressing thaw depth, evaporation, and precipitation do affect the extent of surface water. Waterbody maps therefore reflect the local water balance at the time of image acquisition. Seasonal reduction of surface water extent, however, is largest in the first 2 weeks following snowmelt (Bowling et al. 2003). All PeRL maps date from the late summer season so that snowmelt and the early summer season are excluded. Changes of water extent in late summer are primarily due to evaporation and precipitation. In a study area on the Barrow Peninsula, Alaska, we find that the open water extent varies between 6 % and 8 % between the beginning and end of August of different years. However, the effect is hard to quantify as other factors such as spectral properties and resolution also impact classifications of different times at the same site. Seasonal variations may be larger in case of heavy rain events right before image acquisition but ultimately depend on local conditions which control surface and subsurface runoff.***

Some small comments: Table 1: why do you abbreviate Permafrost depth as PT? That doesn't make any sense and is certainly not intuitive.

**The abbreviation was corrected to "PD".**

Duplicate paragraph: 4.5 Accuracy assessment of classification. This paragraph is a duplication of what is written a page earlier, p. 8, lines19-26.

**The duplicated paragraphs were deleted and their information instead incorporated into Table 1 and section "5.1 Site-level waterbody maps" [page 13, lines 16-20] and into section "6.1 Classification accuracy and variability" [page 21,22]**

# PeRL: A Circum-Arctic Permafrost Region Pond and Lake Database

Sina Muster<sup>1</sup>, Kurt Roth<sup>2</sup>, Moritz Langer<sup>3</sup>, Stephan Lange<sup>1</sup>, Fabio Cresto Aleina<sup>4</sup>, Annett Bartsch<sup>5</sup>, Anne Morgenstern<sup>1</sup>, Guido Grosse<sup>1</sup>, Benjamin Jones<sup>6</sup>, A. Britta K. Sannel<sup>7</sup>, Ylva Sjöberg<sup>7</sup>, Frank Günther<sup>1</sup>, Christian Andresen<sup>8</sup>, Alexandra Veremeeva<sup>9</sup>, Prajna R. Lindgren<sup>10</sup>, Frédéric Bouchard<sup>11,13</sup>, Mark J. Lara<sup>12</sup>, Daniel Fortier<sup>13</sup>, Simon Charbonneau<sup>13</sup>, Tarmo A. Virtanen<sup>14</sup>, Gustaf Hugelius<sup>7</sup>, Juri Palmtag<sup>7</sup>, Matthias B. Siewert<sup>7</sup>, William J. Riley<sup>15</sup>, Charles D. Koven<sup>15</sup>, and Julia Boike<sup>1</sup>

<sup>1</sup> Alfred Wegener Institute Helmholtz Centre for Polar and Marine Research, Telegrafenberg A43, 14473 Potsdam, Germany

<sup>2</sup> Institute for Environmental Physics, Heidelberg University, Germany

<sup>3</sup> Humboldt University, Berlin, Germany

<sup>4</sup> Max Planck Institute for Meteorology, Hamburg, Germany

<sup>5</sup> Zentralanstalt für Meteorologie und Geodynamik, Vienna, Austria

<sup>6</sup> U.S. Geological Survey - Alaska Science Center, Anchorage, AK 99508, USA

<sup>7</sup> Stockholm University, Department of Physical Geography and the Bolin Centre for Climate Research, 10691 Stockholm, Sweden

<sup>8</sup> Los Alamos National Laboratory, Los Alamos, NM, USA

<sup>9</sup> Institute of Physicochemical and Biological Problems in Soil Science, Russian Academy of Sciences, Pushchino, Russia

<sup>10</sup> Geophysical Institute, University of Alaska Fairbanks, Fairbanks, AK, USA

<sup>11</sup> Institut national de la recherche scientifique (INRS), Centre Eau Terre Environnement (ETE), Québec QC, G1K 9A9, Canada

<sup>12</sup> Department of Plant Biology, University of Illinois at Urbana-Champaign, Urbana, IL 61801, USA

<sup>13</sup> Geography Department, University of Montréal, Montréal QC, H3C 3J7, Canada

<sup>14</sup> Department of Environmental Sciences, University of Helsinki, Finland

<sup>15</sup> Climate and Ecosystem Sciences Division, Lawrence Berkeley National Laboratory, Berkeley, USA

*Correspondence to:* Sina Muster (sina.muster@awi.de)

**Abstract.** Ponds and lakes are abundant in Arctic permafrost lowlands. They play an important role in Arctic wetland ecosystems by regulating carbon, water, and energy fluxes and providing freshwater habitats. However, ponds, i.e. waterbodies with surface areas smaller than  $1.0\text{E}+04\text{ m}^2$ , have not been inventoried at global and regional scales. The Permafrost Region Pond and Lake Database (PeRL) presents the results of a circum-arctic effort to map ponds and lakes from modern (2002-2013) high-resolution aerial and satellite imagery with a resolution of 5 m or better. ~~that resolve waterbodies with a surface area between  $1.0\text{E}+02\text{ m}^2$  and  $1.0\text{E}+06\text{ m}^2$ .~~ The database also includes historical imagery from 1948 to 1965 with a resolution of 6 m or better. PeRL includes 69 maps covering a wide range of environmental conditions from tundra to boreal regions and from continuous to discontinuous permafrost zones. Waterbody maps are linked to regional permafrost landscape maps which provide information on permafrost extent, ground ice volume, geology and lithology. This paper describes waterbody classification and accuracy, and presents statistics of waterbody distribution for each site. Maps of permafrost landscapes in Alaska, Canada and Russia are used to extrapolate waterbody statistics from the site level to regional landscape units. PeRL presents pond and lake estimates for a total area of  $1.4\text{E}+06\text{ km}^2$  across the Arctic, about 17 % of the Arctic lowland (<300 m a.s.l.) land surface area. PeRL waterbodies with

sizes of 1.0E+06 m<sup>2</sup> down to 1.0E+02 m<sup>2</sup> contributed up to 21% to the total water fraction. Waterbody density ranged from 1.0E+00 per km<sup>2</sup> to 9.4E+01 per km<sup>2</sup>. Ponds are the dominant waterbody type by number in all landscapes with 45 % to 99 % of the total waterbody number. The implementation of PeRL size distributions into land surface models will greatly improve the investigation and projection of surface inundation and carbon fluxes in permafrost lowlands. Waterbody maps, study area boundaries and maps of regional permafrost landscapes including ~~link to~~ detailed metadata are available at <https://doi.pangaea.de/10.1594/PANGAEA.868349>.

## 1 Introduction

Globally, Arctic lowlands underlain by permafrost have both the highest number and area fraction of waterbodies (Lehner and Döll, 2004;Grosse et al., 2013;Verpoorter et al., 2014). ~~They~~ These landscapes play a key role as a freshwater resource, as habitat for wildlife, and as part of the water, carbon, and energy cycles (Rautio et al., 2011;CAFF, 2013).

The rapid warming of the Arctic affects the distribution of surface and subsurface water due to permafrost degradation and increased evapotranspiration (Hinzman et al., 2013). Remote sensing studies have found both increasing and decreasing trends in surface water extent for ~~lakes-waterbodies~~ in permafrost regions across broad spatial and temporal scales (eg Carroll et al. (2011);Watts et al. (2012);Boike et al. (2016);Kravtsova and Rodionova (2016)). These studies, however, are limited in their assessment of changes in surface inundation since they only include lakes, *i.e.*, waterbodies with a surface area of 1.0E+04 m<sup>2</sup> or larger. Ponds with a surface area smaller than 1.0E+04 m<sup>2</sup>, on the other hand, have not yet been inventoried on the global scale. Yet ponds dominate the total number of waterbodies in Arctic lowlands, accounting for up to 95% of individual waterbodies, and may contribute up to 30% ~~of to~~ the total water surface area (Muster et al., 2012;Muster, 2013). Arctic ponds are characterized by intense biogeophysical and biogeochemical processes. They have been identified as a large source of carbon fluxes compared to the surrounding terrestrial environment (Rautio et al., 2011;Laurion et al., 2010;Abnizova et al., 2012;Langer et al., 2015;Wik et al., 2016;Bouchard et al., 2015). Due to their small surface areas and shallow depths, ponds are especially prone to change; various studies reported ponds to dry out or to increase in abundance due to new thermokarst or drainage of large lakes (Jones et al., 2011;Andresen and Lougheed, 2015;Liljedahl et al., 2016). Such changes in surface inundation may significantly alter regional water, energy, and carbon fluxes (Watts et al., 2014;Lara et al., 2015). Both monitoring and modeling of pond and lake development are therefore crucial to better understand the trajectories of Arctic land cover dynamics in relation to climate and environmental change. Currently, however, the direction and magnitude of these changes remain uncertain, mainly due to the limited extent of high-resolution studies and the lack of pond representation in global databases. Although recent efforts have produced global land cover maps with resolutions of 30 m (Liao et al., 2014;Verpoorter et al., 2014;Feng et al., 2015;Paltan et al., 2015), these data sets only include lakes.

To complement previous approaches, we present the Permafrost Region Pond and Lake Database (PeRL), a circum-arctic effort ~~that compiles 69 maps of~~ ponds and lakes from remote sensing data with high spatial resolution (of  $\leq 6$  m) (Fig. 1). This database fills the gap in available global databases that have cutoffs in waterbody surface area at 1.0E+04 m<sup>2</sup> or above. In addition, we link PeRL waterbody maps with existing maps

of permafrost landscapes to extrapolate waterbody distributions from the individual study areas to larger landscapes units. Permafrost landscapes are terrain units characterized by distinct properties such as climate, surficial geology, parent material, permafrost extent, ground ice content, and topography. These properties have been identified as major factors in the evolution and distribution of northern waterbodies (Smith et al., 2007;Grosse et al., 2013;Veremeeva and Glushkova, 2016).

The core objectives of the PeRL database are to (i) archive and disseminate fine-resolution geospatial data of northern high latitude waterbodies ( $\leq 6$  m spatial resolution), (ii) quantify the intra- and interregional variability in waterbody size distributions, and (iii) provide regional key statistics, including the uncertainty in waterbody distributions, that can be used to benchmark site-, regional-, and global-scale land models.

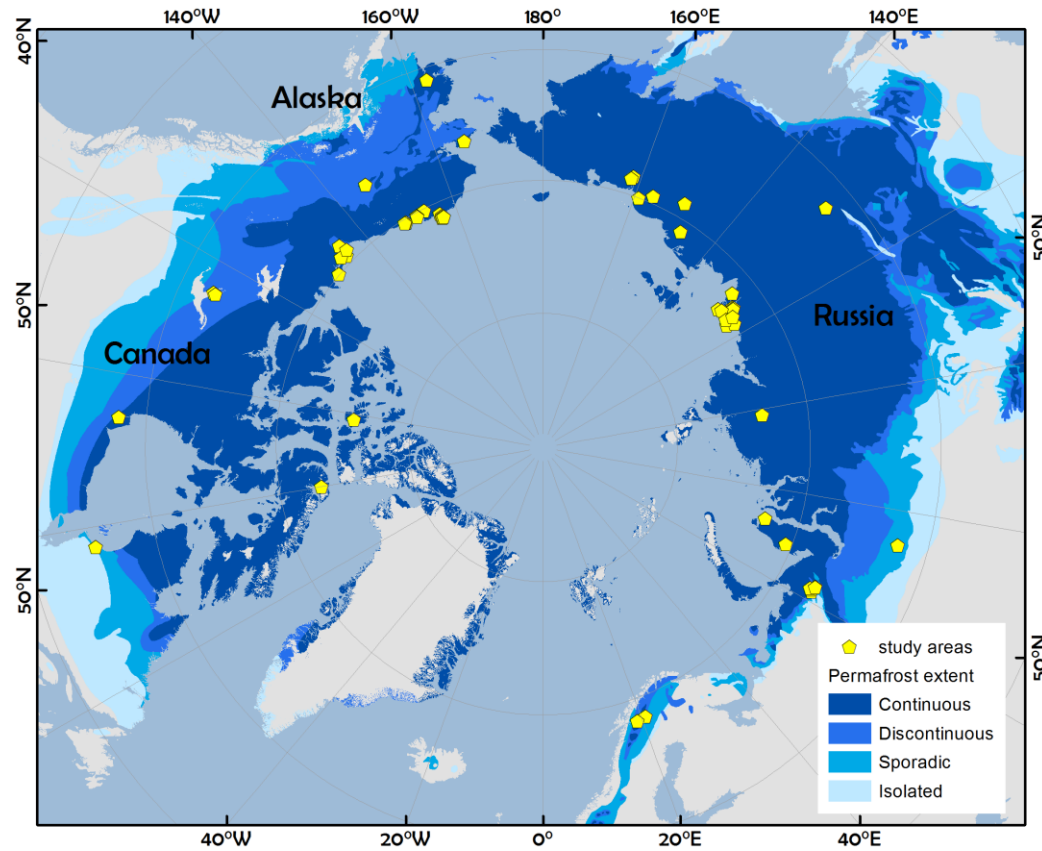

Fig. 1: Distribution of PeRL study areas. Permafrost extent according to Brown et al. (1998).

## 2 Definition of ponds and lakes

The definition of ponds and lakes varies in the literature and depends on the chosen scale and goal of studies when characterizing waterbodies. The Ramsar classification scheme defines ponds as permanently inundated basins smaller than 8.0E+04 m<sup>2</sup> in surface area (Ramsar Convention Secretariat, 2010). Studies have also used surface areas smaller than 5.0E+04 m<sup>2</sup> (Labrecque et al., 2009) or 1.0E+04 m<sup>2</sup> (Rautio et al., 2011) to distinguish ponds from lakes.

In remote sensing studies, surface area is the most reliably inferred parameter related to waterbody properties. Physical and biogeochemical processes of waterbodies, however, also ~~depend~~ strongly depend on waterbody depth. Differences in thermodynamics are associated with water depth, where deeper lakes may develop a stratified water column while shallow ponds remain well mixed. In high latitudes, waterbodies with depths greater than 2 m are likely to remain unfrozen at the bottom throughout winter, with ~~implications for providing~~ overwintering habitat ~~availability~~ for fish and other aquatic species. In permafrost regions, a continuously unfrozen layer (talik) may develop underneath such deeper ~~ponds waterbodies~~, which strongly affects carbon cycling in these sediments (Schuur et al., 2008). Several studies have shown a positive correlation between waterbody surface area and depth (Langer et al., 2015; Wik et al., 2016). However, there is large variability in the area-depth relationship, i.e., there are large but shallow lakes that freeze to the bottom and small but deep ponds that develop a talik, and these characteristics may also change over time with changes in water level and basin morphology. In this study we distinguish ponds and lakes based on their surface area. We adopt the distinction of Rautio et al. (2011) and define ponds as bodies of largely standing water with surface area smaller than 1.0E+04 m<sup>2</sup> and lakes as waterbodies with surface area of 1.0E+04 m<sup>2</sup> or larger.

## 3 Study areas

~~PeRL study areas are widely distributed throughout Arctic lowlands in Alaska, Canada, Europe, and Russia and cover a latitudinal geographic gradient of 20° (55.3°N to 75.7°N), including tundra to boreal regions, continuous to discontinuous permafrost zones (Fig. 1). Mean annual temperature ranges from 0 °C to -20 °C and average annual precipitation ranges from 97 mm to 650 mm (Table 1).~~

### 4.3 PeRL Database Generation

#### 4.3.1 Data sources and processing

~~PeRL's goal is to make high-resolution waterbody maps available to a large science community. PeRL compiles both previously published and unpublished fine-scale waterbody maps. Maps were included if they met the resolution criteria of 5m or less for modern imagery and 6 m for historical imagery. Historical imagery was included to enable high-resolution change detection of ponds and lakes.~~

~~PeRL compiles both previously published and unpublished fine-scale waterbody maps. Twenty-nine maps were specifically produced for PeRL to complement the published maps in order to represent a broad range of landscape types with regard to permafrost extent, ground ice content, geology and ecozone.~~ All waterbody maps were derived from optical or radar airborne or satellite imagery ~~with spatial resolutions of  $\leq 6$  m~~ that were acquired between mid and late summer (July–September), thereby excluding the snow melt and early summer season. Modern imagery dates from 2002–2013 and historical imagery dates from 1948–1965. ~~Historical imagery allows high-resolution change detection of ponds and lakes.~~

Previously published maps ~~were~~ are the product of many independent studies originally created for a variety of purposes and from various experts which leads to a broad range of image types and classification methods used. For details on image processing and classification procedures for already published maps (n=31) we refer to the supplement (Supplementary Table SB1 and B2) and the respective publications. ~~Twenty-eight maps were specifically produced for~~ The processing of new PeRL maps ~~PeRL for which we provide the methods in the following is described in~~ section 3.2. Sections 4.3 to 4.6 then describe methods applicable to all waterbody maps.

## **3.2 PeRL image processing and classification**

### **4.2.1 TerraSAR-X imagery**

Available high-resolution imagery used for PeRL map production included optical aerial and satellite imagery (GeoEye, QuickBird, WorldView-1 and -2, and KOMPSAT-2) and radar (TerraSAR-X) imagery.

Most optical imagery provided a near-infrared band that was used for classification with the exception of WorldView 1 that only has a panchromatic band. Preprocessing of the optical imagery involved georeferencing or orthorectification depending on the availability of high resolution digital elevation models (Supplementary Table S1).

TerraSAR-X imagery was available for sites in the Mackenzie Delta, Tuktoyaktuk Coastlands, and Tanzin Uplands in Canada; the Beaufort Coastal Plain and the Yukon Delta in Alaska; and the West Siberian Lowlands and Yamal Peninsula in Russia. TerraSAR-X (TSX) imagery was acquired in Stripmap Mode with an HH polarization as the geocoded Enhanced Ellipsoid Corrected (EEC) product or as the Single Look Slant Range Complex (SSC) product which was then processed to EEC (Supplementary text S1). TSX images were filtered in ENVI v4.7 (ITTVIS) in order to reduce image noise: a lee filter with a 3x3 pixel window followed by a gamma filter with a 7x7 or 11x11 window depending on the image quality (Klonus and Ehlers, 2008).

Geocoded EEC products obtained from DLR are delivered in radar brightness. They are projected to the best available DEM, i.e., SRTM X band DEMs (30 m resolution) and SRTM C band DEMs (90 m resolution). For the remaining areas, the 1 km resolution GLOBE30 DEM is used. The EEC is a detected multi-look product with reduced speckle and approximately square cells on ground. The slant range resolution of the image is 1.2 m, which corresponds to 3.3–3.5 m projected on the ground for incidence angles between 45° and 20° and an azimuth resolution of 3.3 m (Eineder et al., 2008). SSC were geocoded to the DUE Permafrost DEM (Santoro and Cartus, 2010) and no multi-look was applied. TSX data were despeckled in ENVI 4.7 using a lee filter with a 3x3 pixel window followed by a gamma filter with a 7x7 or 11x11 window depending on the image quality (Klonus et al., 2008).

#### **4.2.2 Optical imagery**

Optical imagery used for PeRL map production included aerial imagery, GeoEye, QuickBird, WorldView 1 and 2, and KOMPSAT 2 imagery. Pixel resolutions ranged from less than 1 m to 4 m. Most imagery provided a near-infrared band that was used for classification with the exception of WorldView 1 that only has a panchromatic band. Preprocessing of the imagery involved georeferencing or orthorectification depending on availability of high resolution digital elevation models (Table B2).

### **4.2.3 Classification of open water**

Imagery was ~~Both TerraSAR-X and optical imagery were~~ classified using either a density slice or an unsupervised k-means classification in ENVI v4.8 (ITTVIS). The panchromatic, the near-infrared and the X-Band (HH-polarization) show a sharp



contrast between open water and surrounding vegetation. Visual inspection of the imagery could therefore be used to determine individual thresholds values (in case of density slice) or to assign classes (in case of k-means unsupervised classification) for the extraction of open water surfaces. Threshold values and class boundaries varied between images and sites due to differences ~~in~~ illumination, ~~and~~ acquisition geometry and ~~different sensor spectroradiometry/radiometric~~ properties of images. Detailed information on remote sensing imagery and classification procedure for each site is listed in the supplement (Supplementary Table B1 and B2).

#### **4.3 Post-processing of waterbody maps**

~~The classification procedure in ENVI produces raster images that were converted to ESRI vector files. Classification results from raster image processing were converted to ESRI vector files in ENVI v4.8 (ITTVIS) so that each waterbody is represented as a single polygon. Vector files were then manually processed in ArcGIS v10.2 (ESRI) to fill gaps in waterbody surfaces, remove streams, rivers, shadows due to clouds or topography and partial lakes along the study area boundaries. Minimum waterbody size was set to at least 4 pixels. This equals less than 4 m<sup>2</sup> for the highest resolutions of less than 1 m and 64 m<sup>2</sup> for the lowest resolution of 4 m for modern imagery (1.4E+02 m<sup>2</sup> for historical imagery with resolutions of 6 m). All classified objects smaller than the minimum size were removed. Partial lakes along the study area boundaries, segments of streams and rivers, and shadows due to clouds or topography were manually removed.~~

~~Commission errors occurred where high reflectance from lake bottoms, turbid waters, shadows or waves on the water surface resulted in higher digital number (DN) values and therefore a misclassification of water as land. Many of these commission errors result in gaps or holes in the lake surface which were removed with a gap filling procedure in ArcGIS. Partial lakes within the study area were edited manually. Partial lakes along the study area boundaries, segments of streams and rivers, and shadows due to clouds or topography were removed. Minimum waterbody size was set to at least 4 pixels and all classified objects smaller than the minimum size were removed.~~

~~Three study areas in the Hudson Bay Lowlands (Canada), Lapland (Sweden), and the Usa River basin (Russia), feature multi-temporal but very small waterbody maps with extents less than 4 km<sup>2</sup> and less than 300 waterbodies. They also contain partial waterbodies along the study area boundaries. Partial lakes were not removed in order to retain the maximum information about waterbody boundaries for change detection analysis. Very large waterbody maps in the Lena Delta and Yakutsk region include river and stream segments that were not manually corrected. Compared to manually refined classifications in the same area, these RapidEye classifications showed a higher estimation of pond number by 35% and of pond surface area by 21%. Information about whether a map includes partial lakes or misclassification areas is given in the metadata (Table B1).~~

#### **4.3.3 Study area boundaries**

Each waterbody map is associated with a vector file that delineates the study area's boundary. Boundaries were calculated for each map ~~– whether new or previously published –~~ in ArcGIS by first producing a positive buffer of 1 km to 3 km around each waterbody in the map and merging the individual buffers into one single polygon. From that single buffer polygon we then subtracted again the same distance which rendered the study area boundary. The area of the boundary is referred to as the total mapped area extent of that site (Table 1). For sites with multi-temporal data, the total mapped area extent of the oldest classification was chosen as a reference in order to calculate changes in pond and lake statistics over time.

## 4.6 PeRL statistical analysis

Statistics such as areal fraction of water or average waterbody surface area are meaningful measures to compare waterbody distributions between individual study areas and permafrost landscapes. Statistics were calculated for all waterbodies, as well as separately for ponds and lakes. We calculated areal fraction, i.e., the area fraction of water relative to land (the total mapped area), and waterbody density, i.e. the number of individual waterbodies per km<sup>2</sup>, and mean, median, and standard deviation of surface area for each site using the software package R version 3.3.1. However, statistics are subject to the size of the study area. Very small study areas may not capture larger waterbodies which may nonetheless be characteristic of the larger landscape. Very large study areas, on the other hand, may show more spatial variation in waterbody distribution than smaller study areas. In order to make statistics comparable between study areas, we subdivided larger study areas into boxes of 10x10 km. Box size was chosen as a function of the standard error (Supplementary text S2). We calculated the statistics for each box and then averaged the statistics across all boxes within each study area. This subgrid analysis was conducted for all study areas larger than 300 km<sup>2</sup> for which at least 4 boxes could be sampled.

Statistics are also subject to image resolution which defines the minimum object size that can be confidently mapped. For all modern imagery, the minimum waterbody size included in the calculation of statistics was therefore set to 1.0E+02 m<sup>2</sup> (1.4E+02m<sup>2</sup> for historical imagery). Very large lakes are not representative of all study areas and may only be partially mapped within a 10x10 km box. We therefore chose a maximum waterbody size of 1.0E+06 m<sup>2</sup> to be included in the calculation of statistics.

The representativity of these parameters is subject to the study area size, its location within a landscape, and the image resolution. Image resolution defines the minimum object size that can be confidently mapped, whereas study area size determines if very large lakes can be representatively captured. For statistical comparison, we therefore included only waterbodies with sizes of 1.0E+06 down to 1.0E+02 m<sup>2</sup>. Additionally, imagery may capture a certain variation of the landscape's waterbody distribution which may not be representative of the larger landscape. In order to determine a representative total mapping area we compared the variability of probability density functions (PDF) and distribution parameters within three study areas in Russia, Canada, and Alaska. In each study area, we performed a subgrid analysis, i.e., we selected waterbodies from a minimum of 5 and up to 50 randomly distributed boxes with varying sizes of 5x5 km, 10x10 km, and 20x20 km. We calculated the standard error of the mean of all statistical parameters across all boxes of the same size. Relative error of density (waterbody number per km<sup>2</sup>) and waterbody mean surface area was lowest for 10x10 km boxes. Relative error increased with 20x20 km boxes which is probably due to the significantly lower number of boxes that can be sampled from the study areas. Only 12 PeRL sites have a study area larger than 1000 km<sup>2</sup> that would allow us to sample a minimum of 5 boxes of 20x20 km in size. A box size of 10x10 km allows the subsampling of 26 sites with a minimum of 5 boxes. Taking into account the overall variability of distributions and the possible number of subgrid samples, a box size of 10x10 km was chosen for subgrid analysis. Subgrid analysis was conducted for study areas larger than 300 km<sup>2</sup> and the mean of each statistical parameter along with the relative error across the 10x10 km subsets is reported.

### 4 Extrapolation of site-level waterbody statistics to permafrost landscapes

#### **4.6 Regional maps of pond and lake distributions**

Regional maps of permafrost landscapes were used to extrapolate waterbody maps for lowlands with elevations lower than

300 m a.s.l.

#### **4.1 Regional maps of permafrost landscapes**

Waterbody statistics of each site were extrapolated to permafrost landscapes based on the assumption that distributions of ponds and lakes are similar for similar permafrost landscapes, i.e. areas with similar properties regarding We define permafrost landscapes as a unique combination of climate, geology, lithology (soil texture), permafrost extent and ground ice volume. Vector maps of these landscape properties permafrost landscapes (PLM) are available on the regional level: the Alaskan map of permafrost characteristics (AK2008) (Jorgenson et al., 2008), the National Ecological Framework for Canada (NEF) (Marshall et al., 1999), and the Land Resources of Russia (LRR) (Stolbovoi and McCallum, 2002). Despite differences in mapping approaches and terminology, the se databases report similar landscape characteristics at comparable scales. All regional maps were available as vector files which were converted to a common North Pole Lambert Azimuthal Equal-Area (NPLAEA) projection. All PL maps PLM were clipped in ArcGIS v10.4 with a lowland mask including only areas with elevations of 300 m or lower. The lowland mask was derived for the whole Arctic using the digital elevation model GTOPO30 (USGS). Vector files of permafrost landscapes are available for Alaska, Canada and Russia. Details on the properties of each PLM are provided in the supplement (Supplementary Text S3, S4, and S5 and supplementary tables S2, S3, and S4). The original PLM were merged in ArcGIS to produce a unified circum-arctic vector file and map representation. Landscape attributes that were retained from the original PLM were ecozone, permafrost extent, ground ice volume, surficial geology, and lithology. Variable names were consolidated using uniform variable names (Supplementary table S5).

Processing of each map is described in detail in the sections 4.6.1, 4.6.2 and 4.6.3. Attributes of all regional and circum-arctic vector files of permafrost landscapes are described in Tables C1, C2, C3, and C4.

#### **4.6.1 Alaskan permafrost landscape maps**

The PL map of Alaska reports surficial geology, MAAT, primary soil texture, permafrost extent, ground ice volume, and primary thermokarst landforms (Jorgensen et al., 2008). A rule based model was used to incorporate MAAT and surficial geology. Permafrost characteristics were assigned to each surficial deposit under varying temperatures using terrain-permafrost relationships and expert knowledge (Jorgensen et al., 2008).

#### **4.6.2 Canadian permafrost landscape maps**

Permafrost landscapes of Canada are described in the National Ecological Framework (NEF). The NEF distinguishes four levels of generalization nested within each other. Ecozones represent the largest and most generalized units followed by ecoprovinces, ecoregions, and ecodistricts. Ecodistricts were delineated based mainly on differences in parent material, topography, landform and soil development derived from the Soil Landscapes of Canada (Soil Landscapes of Canada Working Group, 2010) at a map scale of 1:3,000,000 to 1:1,000,000 (Ecological Stratification Working Group, 1995; Marshall, 1999) whereas ecoregions and ecoprovinces are generalized based mainly on climate, physiography, and vegetation. Ecodistricts were therefore chosen as most appropriate to delineate permafrost landscapes. NEF reports the areal fraction of the underlying soil landscape units and attributes nested within each ecodistrict. The dominant fraction of surficial geology, lithology, permafrost extent and ground ice volume was chosen to describe each ecodistrict. Ecodistricts with the same permafrost landscape type within the same ecozone were then merged to PL units.

#### 4.6.3 Russian permafrost landscape characterization

In Russia, information about permafrost extent, ground ice content, generalized geology and lithology was available only as individual vector maps. The individual maps were combined in ArcGIS 10.4 to delineate Russian PL units similar to the Canadian and Alaskan databases. Russian ecozones were mapped using the global scale map by Olson et al. (2001) which conforms to the Alaskan and Canadian ecozones. The geometric union of ecozone, ground ice content, and permafrost extent was calculated in ArcGIS 10.1 via the tool “intersect”. Each unique combination of these three variables was assigned the dominant fraction of geology and lithology type.

#### 4.6.4 Integration of regional permafrost landscapes

**Table 2: Terminology for permafrost properties in the regional permafrost databases of Alaska (AK2008), Canada (NEF), and Russia (LRR).**

| Description       | PeRL       | AK2008     | NEF        | LRR        |
|-------------------|------------|------------|------------|------------|
| ecozone           | ECOZONE    | NA         | ecozone    | NA         |
| surficial geology | GEN_GEOL   | AGGRDEPOS  | UNIT       | PARROCK    |
| lithology         | LITHOLOGY  | TEXTURE    | TEXTURE    | TEXTUR     |
| permafrost extent | PF_EXTENT  | PF_EXTENT  | PERMAFROST | EXTENT_OF_ |
| ground ice        | GROUND_ICE | ICECLOWASS | PERMAFROST | MIN_MAX    |

#### 4.6.5.4.2 Extrapolation of waterbody statistics to permafrost landscapes

Waterbody maps were spatially linked with their associated permafrost landscape. Maps within the same landscape were combined whereas maps spanning two or more landscapes were divided by selecting all waterbodies that intersected with the respective permafrost landscape. ~~Generally, waterbody statistics were extrapolated for study areas with single or combined total mapped areas of  $1.0E+02$  km<sup>2</sup> or larger. If several maps were present within one permafrost landscape unit they were combined and average statistics were calculated across all maps in that permafrost landscape unit.~~ Historical maps and ~~RapidEye unedited~~ classifications ~~affected by large scale inclusion of rivers and streams (see section 4.5)~~ were not ~~included used~~ in the extrapolation.

Extrapolations were done in Alaska, Canada and Russia for waterbody maps with a (combined) extent of 100 km<sup>2</sup> or larger, but not for Europe where available waterbody maps were too small. Maps in the Canadian High Arctic were smaller than  $1.0E+02$  km<sup>2</sup> but represent typical wetlands in that region and were therefore included in the extrapolation. Figures A1, A2, A3, and A4 in the appendix show the location of waterbody maps within their associated permafrost landscape.

Extrapolated ~~values-statistics~~ were assigned two confidence classes: (1) high (+) and (2) low (-) confidence. Permafrost landscapes were assigned a high confidence if a map was present in the permafrost landscape of that ecozone. ~~If in the A low confidence indicates that statistics were derived from the~~ same permafrost landscape but in a different ecozone. ~~the~~

~~same waterbody statistics were assigned with a low confidence.~~ Due to differences in the mapping and generalization of landscape properties methodology of mapping and extrapolating permafrost and landscape characteristics of the regional PLM, the extrapolation was conducted only within each region. ~~Figures D1, D2, D3, and D4 show the location of waterbody maps within their associated permafrost landscape.~~

**Table 1. Characteristics of waterbody maps.** A “clean” map state indicates that the map only includes ponds or lakes. A “raw” map state indicates that no manual editing was conducted and the map may contain rivers, streams, partial waterbodies or cloud shadows. References indicate whether the map has already been published or was produced specifically for PeRL.

| Map ID         | Map extent [km <sup>2</sup> ] | Resolution [m] | Accuracy     | Classes                                   | Min size [m <sup>2</sup> ] | State                          | Reference                                       |
|----------------|-------------------------------|----------------|--------------|-------------------------------------------|----------------------------|--------------------------------|-------------------------------------------------|
| abi0012010xxxx | 38.4                          | 1.0            | >0.71        | open water                                | 30.0                       | clean                          | this paper                                      |
| arg00120110829 | 195.9                         | 4.0            | N/A          | open water                                | 64.0                       | clean                          | this paper                                      |
| arg0022009xxxx | 5023.6                        | 5.0            | 0.85         | open water                                | 100.0                      | raw                            | Bartsch and Seifert (2012)                      |
| arg00320110711 | 223.7                         | 4.0            | N/A          | open water                                | 64.0                       | clean                          | this paper                                      |
| bar00119480804 | 19.0                          | 0.7            | N/A          | open water                                | 16.0                       | clean                          | Andresen and Loughheed (2015)                   |
| bar00120020802 | 19.0                          | 0.7            | N/A          | open water                                | 16.0                       | clean                          | Andresen and Loughheed (2015)                   |
| bar00120080730 | 19.0                          | 0.7            | N/A          | open water                                | 16.0                       | clean                          | Andresen and Loughheed (2015)                   |
| bar00120100810 | 19.0                          | 0.5            | 0.93         | open water                                | 16.0                       | clean                          | Andresen and Loughheed (2015)                   |
| byk00120060709 | 170.2                         | 2.5            | N/A          | open water                                | 30.0                       | clean                          | Grosse et al. (2008)                            |
| byl00120160728 | 45.3                          | 0.5            | 0.77         | open water                                | 16.0                       | clean                          | this paper                                      |
| che00120020709 | 220.8                         | 1.0            | N/A          | open water                                | 30.0                       | clean                          | Grosse et al. (2008)                            |
| che00220090724 | 340.3                         | 3.0            | 0.97         | open water                                | 36.0                       | clean                          | Widhalm et al. (2014a);Widhalm et al. (2014b)   |
| elc00120090825 | 126.0                         | 2.5            | N/A          | open water, water with emersed vegetation | 25.0                       | clean                          | this paper                                      |
| elc00220020801 | 143.2                         | 0.6            | 0.89 to 0.95 | open water                                | 7.8                        | clean                          | Lara et al. (2015)                              |
| elc00320090802 | 51.4                          | 4.0            | N/A          | open water                                | 64.0                       | clean                          | Muster et al. (2013)                            |
| elc004200808xx |                               | 0.6            | >0.75        | troughs with open water                   | 1.5                        | clean                          | Lara et al. (2015)                              |
| esk00120090727 | 923.4                         | 2.5            | N/A          | open water                                | 36.0                       | clean                          | this paper                                      |
| fir00120090906 | 150.0                         | 4.0            | N/A          | open water                                | 64.0                       | clean                          | this paper                                      |
| fir0022009xxxx | 9825.7                        | 5.0            | 0.85         | open water                                | 100.0                      | raw                            | Bartsch and Seifert (2012)                      |
| fis00120020715 | 236.8                         | 1.3            | N/A          | open water                                | 100.0                      | clean                          | Jones et al. (2013)                             |
| grp00119590707 | 0.2                           | 0.4            | N/A          | open water                                | 17.0                       | clean                          | Bouchard et al. (2014)                          |
| grp00120060707 | 0.2                           | 0.61           | N/A          | open water                                | 13.0                       | clean                          | Bouchard et al. (2014)                          |
| hbl00119540701 | 4.0                           | 1.0            | N/A          | open water                                | 51.0                       | clean with partial waterbodies | Sannel and Brown (2010);Sannel and Kuhry (2011) |
| hbl00119740617 | 4.0                           | 1.0            | N/A          | open water                                | 53.0                       | clean with partial waterbodies | Sannel and Brown (2010);Sannel and Kuhry (2011) |
| hbl00120060706 | 4.0                           | 0.6            | N/A          | open water                                | 55.0                       | clean with partial waterbodies | Sannel and Brown (2010);Sannel and Kuhry (2011) |
| ice0032009xxxx | 788.1                         | 5.0            | 0.85         | open water                                | 100.0                      | raw                            | Bartsch and Seifert (2012)                      |
| imc00120040725 | 1309.9                        | 0.7            | N/A          | open water                                | 100.0                      | clean                          | this paper                                      |
| ind00120090907 | 654.0                         | 0.5            | N/A          | open water                                | 100.0                      | clean                          | this paper                                      |
| kol00119650721 | 2382.0                        | 5.0            | N/A          | open water                                | 200.0                      | clean                          | this paper                                      |
| kol00219650721 | 2638.1                        | 5.0            | N/A          | open water                                | 200.0                      | clean                          | this paper                                      |

| Map ID          | Map extent [km²] | Resolution [m] | Accuracy | Classes           | Min size [m²] | State                          | Reference                                     |
|-----------------|------------------|----------------|----------|-------------------|---------------|--------------------------------|-----------------------------------------------|
| kcp001201007xx  | 20.7             | N/A            | N/A      | open water        | 1.0           | clean                          | Walker et al. (1986);Raynolds et al. (2014)   |
| kcp002201007xx  | 20.1             | N/A            | N/A      | open water        | 1.0           | clean                          | Walker et al. (1986);Raynolds et al. (2014)   |
| kcp003201007xx  | 18.9             | N/A            | N/A      | open water        | 1.0           | clean                          | Walker et al. (1986);Raynolds et al. (2014)   |
| ksl00119620628  | 558.8            | 6.0            | N/A      | open water        | 144.0         | clean                          | this paper                                    |
| ksl0012012xxxx  | 558.8            | 2.5            | N/A      | open water        | 25.0          | clean                          | this paper                                    |
| kur00120100805  | 55.5             | 1.0            | N/A      | open water        | 4.0           | clean                          | this paper                                    |
| kur00220080926  | 251.5            | 2.5            | N/A      | open water        | 187.0         | clean                          | this paper                                    |
| kyt00120070728  | 262.3            | 3.0            | 0.97     | open water        | 36.0          | clean                          | Widhalm et al. (2014a);Widhalm et al. (2014b) |
| log00120110811  | 69.7             | 2.4            | 0.90     | open water        | 23.0          | clean                          | Palmtag et al. (2016)                         |
| mdn00120100716  | 1510.3           | 2.5            | N/A      | open water        | 64.0          | clean                          | this paper                                    |
| mdw00120090921  | 1614.8           | 2.5            | N/A      | open water        | 36.0          | clean                          | this paper                                    |
| ole00120060708  | 75.1             | 2.5            | N/A      | open water        | 30.0          | clean                          | Grosse et al. (2008)                          |
| pbp00120090813  | 68.6             | 2.5            | N/A      | open water        | 12.0          | clean                          | Muster et al. (2013)                          |
| ric001201209125 | 587.4            | 2.5            | N/A      | open water        | 8.0           | clean                          | this paper                                    |
| rog00120070626  | 10.0             | 0.6            | N/A      | open water        | 30.0          | clean                          | Sjöberg et al. (2013)                         |
| rog00219740726  | 3.4              | 1.0            | N/A      | open water        | 28.0          | clean with partial waterbodies | Sannel and Kuhry (2011)                       |
| rog00220070707  | 3.4              | 0.6            | N/A      | open water        | 28.0          | clean with partial waterbodies | Sannel and Kuhry (2011)                       |
| rog00320070626  | 59.6             | 2.4            | 0.68     | open water        | 11.0          | clean                          | this paper                                    |
| rog00420070704  | 62.4             | 2.4            | 0.83     | open water        | 29.0          | clean                          | this paper                                    |
| rog00520070704  | 62.6             | 2.4            | 0.83     | open water        | 11.5          | clean                          | this paper                                    |
| sam001200808xx  | 1.6              | 0.3            | N/A      | open water        | 1.0           | clean                          | Muster et al. (2012)                          |
| sei00120070706  | 6.7              | 0.6            | N/A      | open water        | 30.0          | clean                          | Sjöberg et al. (2013)                         |
| sei00220070706  | 82.9             | 2.4            | 0.68     | open water        | 11.5          | clean                          | this paper                                    |
| sei00320080629  | 91.1             | 3.0            | N/A      | open water        | 36.0          | clean                          | this paper                                    |
| sur00120130802  | 1765.6           | 2.0            | N/A      | open water        | 16.0          | clean                          | this paper                                    |
| tav00119630831  | 0.8              | 0.5            | N/A      | open water        | 28.0          | clean with partial waterbodies | Sannel and Kuhry (2011)                       |
| tav00119750810  | 0.8              | 0.9            | N/A      | open water        | 28.0          | clean with partial waterbodies | Sannel and Kuhry (2011)                       |
| tav00120030702  | 0.8              | 1.0            | N/A      | open water        | 28.0          | clean with partial waterbodies | Sannel and Kuhry (2011)                       |
| tbr00120100901  | 694.3            | 2.5            | N/A      | open water        | 36.0          | clean                          | this paper                                    |
| tea00120100901  | 462.9            | 2.5            | N/A      | open water        | 36.0          | clean                          | this paper                                    |
| tuk00120120723  | 477.6            | 2.5            | N/A      | open water        | 36.0          | clean                          | this paper                                    |
| wlc00120090825  | 1400.2           | 2.5            | N/A      | open water, water | 25.0          | clean                          | this paper                                    |

| Map ID         | Map extent [km <sup>2</sup> ] | Resolution [m] | Accuracy     | Classes                                   | Min size [m <sup>2</sup> ] | State | Reference                  |
|----------------|-------------------------------|----------------|--------------|-------------------------------------------|----------------------------|-------|----------------------------|
| wlc00220020801 | 153.8                         | 0.6            | 0.89 to 0.95 | with emerged vegetation<br>open water     | 7.8                        | clean | Lara et al. (2015)         |
| wlc00320090802 | 297.3                         | 4.0            | N/A          | open water                                | 64.0                       | clean | Muster et al. (2013)       |
| yak0012009xxxx | 2035.5                        | 5.0            | 0.85         | open water                                | 75.0                       | raw   | Bartsch and Seifert (2012) |
| yam00120080824 | 1294.3                        | 2.5            | N/A          | open water                                | 36.0                       | clean | this paper                 |
| yam00220100820 | 1006.6                        | 2.5            | N/A          | open water, water with emerged vegetation | 100.0                      | clean | this paper                 |
| yfl0012011xxxx | 100.0                         | 1.0            | N/A          | open water                                | 4.0                        | clean | this paper                 |
| yuk00120090812 | 1078.7                        | 2.5            | N/A          | open water                                | 36.0                       | clean | this paper                 |
| yuk00220090812 | 575.3                         | 2.5            | N/A          | open water                                | 36.0                       | clean | this paper                 |

## 5 PeRL database features ~~and accuracy~~

The database provides two different map products: (i) site level waterbody maps and (ii) an extrapolated circum-arctic waterbody map. The database also provides different tables which present statistical parameters for each individual waterbody map ([Appendix B](#)) and aggregated statistics for PL unit in the circum-arctic map ([Table 3](#)).

### 5.1 Site-level waterbody maps

#### 5.1.1 Data set structure

The database features altogether ~~69-70~~ individual waterbody maps as ESRI shape-files. Each waterbody shape-file is named according to a map ID. The map ID consists of a three letter abbreviation of the site name, followed by a running three-digit number and the acquisition date of the base imagery (YYYY-MM-DD). Vector files were projected to the NPLAEA projection. Area and perimeter of each waterbody and site ~~was-were~~ calculated in ArcGIS 10.4 in square meters. Each vector file is accompanied by an xml-file which lists metadata about classification and references as presented in [table 1 and supplementary Tables SB1-and-B2](#). Each map has a polygon associated with it that ~~describes-contains~~ the study area, i.e., the total land area of the waterbody map. All study areas ~~s~~ boundaries are stored in the file *PeRL\_study\_areas.shp* and can be identified via the map ID. The study area shape-file also includes the site characteristics listed in [Table 42](#).

Fifty-eight maps are considered “clean”, i.e. they have been manually edited to include only ponds and lakes (Table 1). Eight maps are “clean with partial waterbodies”. Those are multi-temporal maps with very small map extents where partial waterbodies along the study area boundary were not deleted in order to retain information for change detection analysis. Four maps were not manually edited due to their very large map extent and may include partial waterbodies, streams, rivers or shadows.

#### 5.1.2 Spatial and environmental characteristics

PeRL study areas are widely distributed throughout Arctic lowlands in Alaska, Canada, Russia, and Europe and cover a latitudinal gradient of about 20° (55.3°N to 75.7°N), including tundra to boreal regions and located in continuous,



discontinuous and sporadic permafrost zones (Fig. 1). Mean annual temperature ranges from 0 °C to -20 °C and average annual precipitation ranges from 97 mm to 650 mm (Table 1).

Twenty-one sites are located in Alaska covering ~~a~~ total area of 7.3E+03 km<sup>2</sup>. Canada has 14 sites covering 6.4E+03 km<sup>2</sup> and Russia has 30 sites covering 2.9E+03 km<sup>2</sup> in total. Four sites are located in Sweden with a total mapped area of 41 km<sup>2</sup>. Individual map extents range from 0.2 km<sup>2</sup> to 9825.7 km<sup>2</sup> with a mean of 622.8 km<sup>2</sup> (Table 1). The database includes six multi-temporal classifications in the Kotzebue Sound Lowlands and on the Barrow Peninsula, Alaska (Andresen et al., 2015), on the Grande Rivière de la Baleine Plateau (Bouchard et al., 2014) and Hudson Bay Lowlands in Canada, Lapland in Sweden, and the Usa River basin in Russia (Hugelius et al.; 2011, Sannel and Kuhry, 2011). Ponds contributed about 45 to 99 % of the total number of waterbodies with a mean of 85 ± 14 % and up to 34 % to the total water surface area with a mean of 12 ± 8.3 % (Fig. 2 and ~~Table E1, E2, E3, E4~~ Appendix B). Mean surface area ranged from 7.9E+01 m<sup>2</sup> with a standard deviation (~~sd~~) of 1.2E+01 m<sup>2</sup> on Bylot Island, Canada, to 7.1E+04 m<sup>2</sup> ± 1.5E+05 m<sup>2</sup> on Eskimo Islands, Canada (Table ~~EB~~ 2). Water fraction of the total mapped area ranged from about 1% to 21% for all waterbodies and from >1 % up to 6% for ponds. Waterbody density per km<sup>2</sup> ranged from 1.0E+00 per km<sup>2</sup> in the Indigirka Lowlands (~~RUS~~), Russia, to 9.4E+01 per km<sup>2</sup> in Olenek Channel of the, Lena Delta (~~RUS~~ Table B4).

**Table 2: Climate and permafrost characteristics for each study area.** Latitude (Lat) and longitude (Long) coordinates are reported in decimal degrees (WGS84). Mean annual air temperature (MAAT), total precipitation (TP), permafrost extent (PE; C-continuous, D-discontinuous, S-sporadic, ~~I-isolated~~), permafrost depth (~~PDT~~). References to all data sources are listed in ~~the~~ Supplementary table S7.

| Map ID                                                                 | Country | Site name                            | Lat  | Long   | MAAT [°C] | TP [mm] | PE | <del>PDT</del> [m] |
|------------------------------------------------------------------------|---------|--------------------------------------|------|--------|-----------|---------|----|--------------------|
| abi0012010xxxx                                                         | Sweden  | Abisko                               | 68.3 | 19.1   | 0         | 362     | S  | >16                |
| arg00120110829,<br>arg0022009xxxx,<br>arg00320110711                   | Russia  | Arga Island                          | 73.5 | 123.6  | -13       | 124     | C  | 400-600            |
| bar00119480804,<br>bar00120020802<br>bar00120080730,<br>bar00120100810 | Alaska  | Barrow Peninsula                     | 70.9 | -156.2 | -11       | 115     | C  | >400               |
| byk00120060709                                                         | Russia  | Bykovsky Peninsula                   | 71.8 | 129.3  | -13       | 427     | C  | 500-600            |
| byl00120160728                                                         | Canada  | Bylot Island                         | 73.2 | -80.0  | -15       | 190     | C  | >200               |
| che00120020709,<br>che00220090724                                      | Russia  | Cherskii                             | 68.8 | 161.6  | -12       | 294     | C  | 400-500            |
| elc00120090825,<br>elc00220020801,<br>elc00320090802                   | Alaska  | Elson Lagoon Coast Plain             | 71.2 | -156.4 | -11       | 115     | C  | >400               |
| esk00120090727                                                         | Canada  | Eskimo Lakes                         | 69.2 | -133.3 | -10       | 161     | C  | 750                |
| fir00120090906,<br>fir0022009xxxx                                      | Russia  | First Terrace, Lena Delta            | 72.9 | 127.3  | -13       | 124     | C  | 400-600            |
| fis00120020715                                                         | Alaska  | Fish-Judy Creek Floodplain           | 70.3 | -151   | -10       | 97      | C  | 260                |
| grp00119590707,<br>grp00120060707                                      | Canada  | Grande Rivière de la Baleine Plateau | 55.3 | -77.5  | -4        | 650     | S  | 10-50              |
| hbl00119540701,<br>hbl00119740617,<br>hbl00120060706                   | Canada  | Coastal Hudson Bay Lowlands          | 57.9 | -94.2  | -6        | 430     | C  | NA                 |
| ice0032009xxxx                                                         | Russia  | Ice complex, Lena Delta              | 72.8 | 124.7  | -13       | 124     | C  | 400-600            |
| imc00120040725                                                         | Alaska  | Ikpikpuk Middle Coastal Plain        | 70.2 | -153.3 | -10       | 97      | C  | 260                |
| ind00120090907,<br>kyt00120070728                                      | Russia  | Indigirka Lowlands, Kytalik          | 69.7 | 148.8  | -14       | 232     | C  | >300               |

| Map ID                                                                                                        | Country | Site name                                | Lat  | Long   | MAAT<br>[°C] | TP [mm] | PE | PDT [m]  |
|---------------------------------------------------------------------------------------------------------------|---------|------------------------------------------|------|--------|--------------|---------|----|----------|
| kol00119650721                                                                                                | Russia  | Kolyma Lowlands                          | 70.0 | 159.1  | -10          | 110     | C  | 500-600  |
| kol00219650721                                                                                                | Russia  | Kolyma Lowlands                          | 69.5 | 156.3  | -13          | 144     | C  | 500-600  |
| kpc001201007xx,<br>kpc002201007xx,<br>kpc003201007xx                                                          | Alaska  | Kuparuk Coastal Plain                    | 70.3 | -148.5 | -10          | 97      | C  | 260      |
| ksl00119620628,<br>ksl0012012xxxx                                                                             | Alaska  | Kotzebue Sound Lowlands                  | 66.2 | -165.8 | -3           | 427     | C  | <50      |
| kur00120100805,<br>kur00220080926                                                                             | Russia  | Kurungnakh, Lena Delta                   | 73.2 | 125.1  | -13          | 124     | C  | 400-600  |
| log00120110811                                                                                                | Russia  | Logata                                   | 73.4 | 98.5   | -13          | 270     | C  | NA       |
| mdn00120100716                                                                                                | Canada  | Mackenzie Delta<br><del>West</del> North | 69.1 | -135.2 | -8           | 241     | D  | <100-500 |
| mdw00120090921                                                                                                | Canada  | Mackenzie Delta<br>North <del>West</del> | 68.5 | -134.7 | -8           | 241     | D  | <100-500 |
| ole00120060708                                                                                                | Russia  | Olenek channel, Lena Delta               | 72.9 | 122.9  | -15          | 206     | C  | 200-600  |
| pbp00120090813                                                                                                | Canada  | Polar Bear Pass                          | 75.7 | -98.5  | -16          | 161     | C  | >500     |
| ric001201209125                                                                                               | Canada  | Richards Island                          | 69.5 | -134.3 | -8           | 241     | C  | >400     |
| rog00120070626,<br>rog00219740726,<br>rog00220070707,<br>rog00320070626,<br>rog00420070704,<br>rog00520070704 | Russia  | Rogovaya                                 | 62.3 | 62.1   | -6           | 538     | C  | ca. 50   |
| sam001200808xx                                                                                                | Russia  | Samoylov Island                          | 72.4 | 126.5  | -13          | 124     | C  | 400-600  |
| sei00120070706,<br>sei00220070706                                                                             | Russia  | Seida                                    | 67.1 | 62.9   | -6           | 470     | C  | ca. 50   |
| sur00120130802                                                                                                | Russia  | Surgut                                   | 62.3 | 74.6   | -17          | 400     | S  | 50-300   |
| tav00119630831,<br>tav00119750810,<br>tav00120030702                                                          | Sweden  | Tavvavuoma                               | 68.5 | 20.9   | -3           | 451     | C  | <25      |
| tbr00120100901,<br>tea00120100901                                                                             | Canada  | Tanzin Upland Beaulieu River             | 62.7 | -115.2 | -4           | 289     | D  | NA       |
| tuk00120120723                                                                                                | Canada  | Tuktoyaktuk Peninsula                    | 69.9 | -130.4 | -10          | 161     | C  | 750      |
| wlc00120090825,<br>wlc00220020801,<br>wlc00320090802                                                          | Alaska  | Wainwright Lower Coastal Plain           | 70.9 | -156.2 | -11          | 115     | C  | >400     |
| yak0012009xxxx                                                                                                | Russia  | Yakutsk                                  | 62.1 | 130.3  | -10          | 228     | C  | 200-300  |
| yam00120080824,<br>yam00220100820                                                                             | Russia  | Yamal Peninsula                          | 71.5 | 70.0   | -6           | 260-400 | C  | 100-500  |
| yfl0012011xxxx                                                                                                | Alaska  | Yukon Flats Basin                        | 66.2 | -145.9 | -5           | 309     | D  | 90       |
| yuk00120090812,<br>yuk00220090812                                                                             | Alaska  | Yukon-Kuskokwim Delta                    |      | -162   | 61           | 471     | C  | 100-200  |

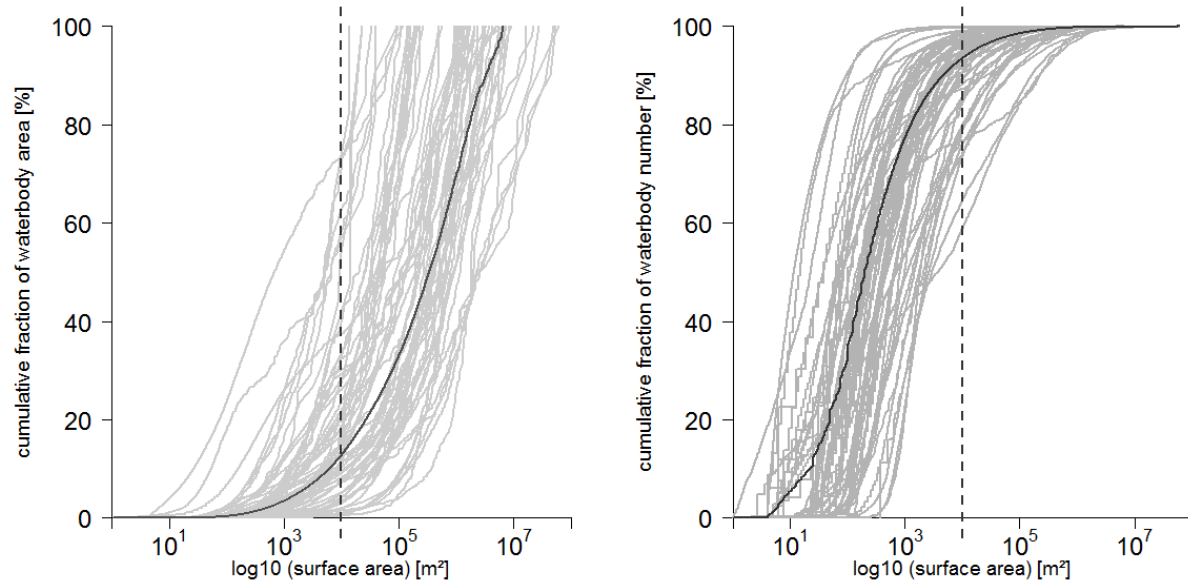

5 **Fig. 2: Empirical cumulative distribution function of waterbody area (left hand side) and waterbody number (right hand side).** Grey lines represent individual sites across all regions. Black lines represent the mean function averaged over all sites. Vertical dashed line in each panel represents the pond-lake size threshold used in this paper.

## 5.2 Circum-arctic waterbody map

### 5.2.1 Data set structure

10 The unified vector file *PeRL\_perma\_land.shp* contains the permafrost landscapes and the extrapolated waterbody statistics (Table 3). Average statistics were calculated for 10 x 10 km boxes within large maps or when four or more maps were present in the permafrost landscapes. Average statistics are reported with their relative standard error (RE). The RE is the standard error expressed as a percentage. The standard error is the standard deviation of the sampling distribution of a statistic. The permafrost landscapes are also provided as separate vector files for each

15 region (*alaska\_perma\_land.shp*, *canada\_perma\_land.shp*, and *ruusia\_perma\_land.shp*) and contains the landscape characteristic of each permafrost landscape as individual attributes (Supplementary tables SX, SX, SX). The unified vector file (*PeRL\_perma\_land.shp*) and the regional files can be joined using the common PERMID.

Table 3: Attributes of ESRI shape-file *PeRL\_perma\_land.shp*

| Field name        | Description                                                                                                                                                                                                                                               |
|-------------------|-----------------------------------------------------------------------------------------------------------------------------------------------------------------------------------------------------------------------------------------------------------|
| <u>PERMA LAND</u> | <u>permafrost landscape: [permafrost extent]/[ground ice volume]/[surficial geology]/[texture]</u>                                                                                                                                                        |
| <u>PERMID</u>     | <u>Each permafrost landscape in the vector file is assigned a unique ID (PERMID). The first digit stands for the region (1 – Alaska, 2 – Canada, 3 – Russia), digits 2–6 identify the single polygon, and the last three digits identify the ecozone.</u> |
| <u>AREA</u>       | <u>area of polygon in square meters</u>                                                                                                                                                                                                                   |
| <u>PERIMETER</u>  | <u>perimeter of polygon in square meters</u>                                                                                                                                                                                                              |
| <u>Map_ID</u>     | <u>Short ID of waterbody map used for extrapolation of statistics</u>                                                                                                                                                                                     |
| <u>confidence</u> | <u>1: high confidence, 2: low confidence</u>                                                                                                                                                                                                              |
| <u>frac</u>       | <u>areal fraction of waterbodies (1.0E+02 m<sup>2</sup> to 1E+06m<sup>2</sup> in surface area) in %</u>                                                                                                                                                   |
| <u>frac_re</u>    | <u>relative standard error of areal fraction of waterbodies (1.0E+02 m<sup>2</sup> to smaller than 1E+06m<sup>2</sup> in surface area) in %</u>                                                                                                           |
| <u>dens</u>       | <u>density: number of waterbodies (1.0E+02 m<sup>2</sup> to 1E+06m<sup>2</sup> in surface area) per square kilometer</u>                                                                                                                                  |
| <u>dens_re</u>    | <u>Relative standard error of density of waterbodies (1.0E+02 m<sup>2</sup> to 1E+06m<sup>2</sup> in surface area) in %</u>                                                                                                                               |
| <u>frac_ponds</u> | <u>areal fraction of waterbodies (1.0E+02 m<sup>2</sup> to smaller than 1E+04m<sup>2</sup> in surface area) in %</u>                                                                                                                                      |
| <u>frac_po_re</u> | <u>relative standard error of areal fraction of waterbodies (1.0E+02 m<sup>2</sup> to smaller than 1E+04m<sup>2</sup> in surface area) in %</u>                                                                                                           |
| <u>dens_ponds</u> | <u>ponds density: number of ponds (1.0E+02 m<sup>2</sup> to 1E+04m<sup>2</sup> in surface area) per square kilometre</u>                                                                                                                                  |
| <u>dens_po_re</u> | <u>relative standard error of pond density (1.0E+02 m<sup>2</sup> to smaller than 1E+04m<sup>2</sup> in surface area) in %</u>                                                                                                                            |

### 5.2.2 Spatial and environmental characteristics

Altogether we identified 230 different permafrost landscapes in the Russian lowlands, 160 in the Canadian lowlands, and 51 in the lowlands of Alaska. PeRL waterbody maps were located in 28 different permafrost landscapes (Table 3) ~~covering which cover~~ a total area of 1.4E+06 km<sup>2</sup> across the Arctic; thereof 1.0E+06 km<sup>2</sup> in Russia, 2.1E+05 km<sup>2</sup> in Canada and 1.7E+05 km<sup>2</sup> in Alaska. About 65% of the extrapolated area was classified as high confidence (Fig. 3). ~~The highest~~ landscape average areal fraction of water surface ~~reached maxima of was~~ 21 % (Fig. 4 and Table 3) and ~~density-waterbody density~~ per km<sup>2</sup> of 57 (Fig. 5 and Table 3).

Relative error (RE) for different subsets or maps within a permafrost landscape was about 7 % on average with a maximum of 30 % (Table 2). RE for waterbody density was 8% on average with a maximum of 50 %. Our extrapolated area (1.4E+6 km<sup>2</sup>) represent~~ed~~ 17.0 % of the current Arctic permafrost lowland area (below 300 m a.s.l. ~~elevation~~). PeRL provid~~ed~~ pond and lakes estimates for about 29 % (in area) of the Alaskan lowlands, 7 % of the Canadian lowlands, and 21 % of the Russian lowlands. Together all extrapolated landscapes contributed about

7% to the current estimated Arctic permafrost area (Brown et al., 1998). In Alaska, waterbody maps were missing for permafrost landscapes with isolated permafrost (16% of total area) or rocky lithology (36% of total area). Dominant types of surficial geology that were not mapped include colluvial sites, and sites with bedrock or of glacial origin which together contribute 61% to the total area. In Canada, both isolated and sporadic permafrost were not inventoried (22% of total area), as well as areas with ground ice content of 10-20 % or less (23% of total area). Six of the 19 geology classes were inventoried which contribute 75% to the total area. Six of seven lithology types with an areal coverage of 90 % were represented. In Russia, waterbody maps were not available in the discontinuous permafrost zone (13 % of the total area). No maps were present in regions with the geological type “deluvial-coluvial and creep” which accounts for 28 % of the total area.

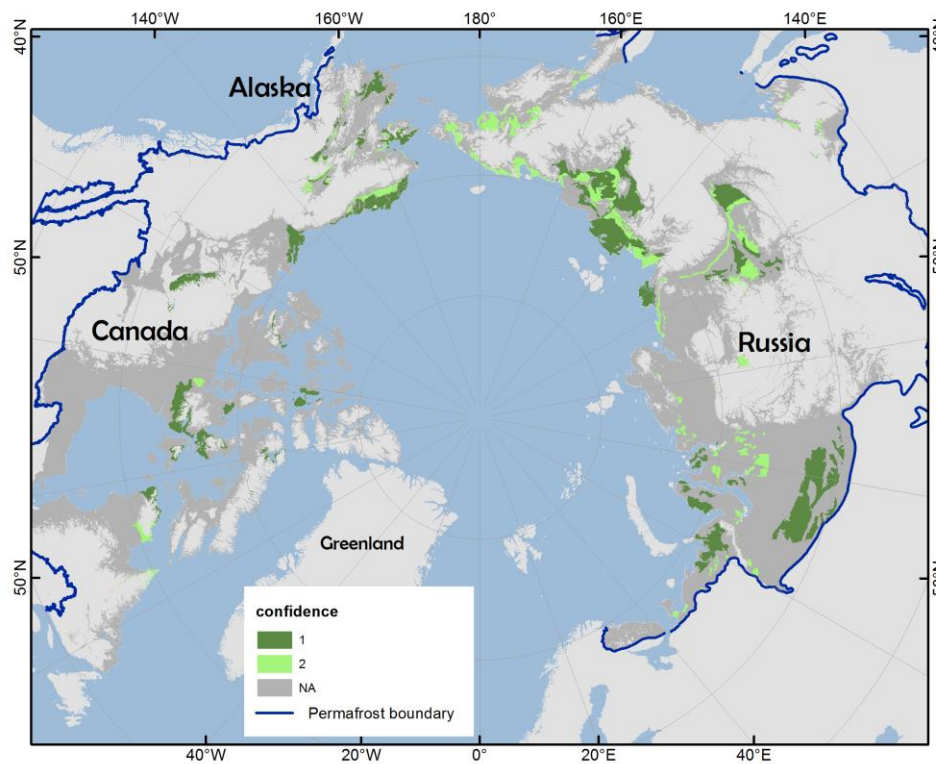

**Fig 3: Confidence for permafrost lowland landscapes .** Confidence class 1 (high confidence) designates permafrost landscapes where waterbody maps are available in lowland areas. Confidence class 2 (low confidence) represents permafrost landscapes with extrapolated waterbody statistics. No value (dark grey) areas indicate that no maps were available in these permafrost landscapes. Light grey areas indicate terrain with elevations (GTOPO 30, USGS) higher than 300 m a.s.l. which were not considered in the extrapolation. Permafrost boundary was derived from the regional databases.

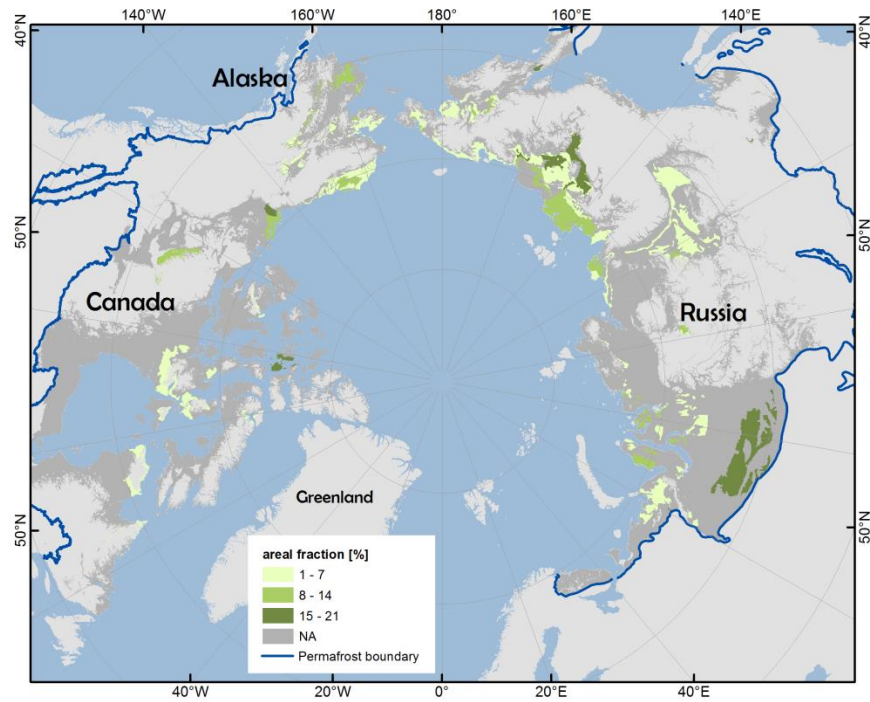

**Figure 4: Areal fraction of waterbodies with surface areas between  $1.0\text{E}+02 \text{ m}^2$  and  $1.0\text{E}+06 \text{ m}^2$ . Permafrost boundary was derived from the regional databases.**

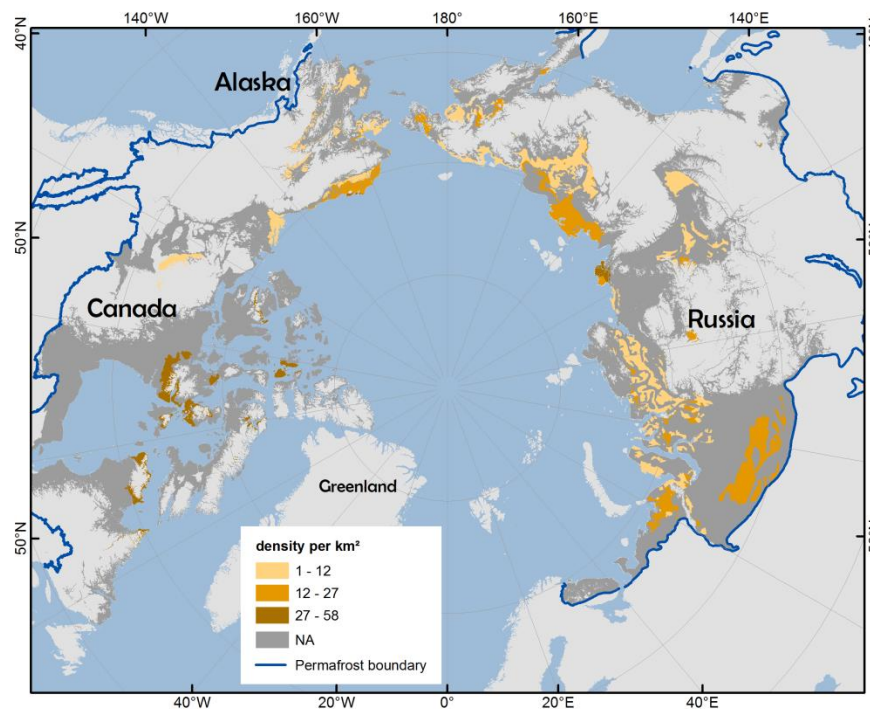

**5 Figure 5: Waterbody density per  $\text{km}^2$  for waterbodies with surface areas of between  $1.0\text{E}+02 \text{ m}^2$  and  $1.0\text{E}+06 \text{ m}^2$  within permafrost landscape units. Permafrost boundary was derived from the regional databases.**



**Table 3: Extrapolated waterbody statistics for permafrost landscapes.** Permafrost extent (PE) is reported as C – continuous, D – discontinuous, and S – sporadic, ~~and I – isolated.~~ Extrapolated statistics include areal fraction and waterbody density-number (frequency per km<sup>2</sup>) for waterbodies ( $\geq 1.0E+02$  and  $\leq 1.0E+06$  m<sup>2</sup>) and ponds ( $\geq 1.0E+02$  and  $< 1.0E+04$  m<sup>2</sup>). Numbers in brackets denote the relative error in %. The relative standard error (RE) was calculated for 10 x 10 km boxes within large maps or when four or more small maps could be averaged. The RE is the standard error expressed as a percentage. The standard error is the standard deviation of the sampling distribution of a statistic.

| Country | Ecozone                            | PE | Ground ice [vol %] | Surficial geology                             | Lithology  | Fraction    | Density     | Pond fraction    | Pond density |
|---------|------------------------------------|----|--------------------|-----------------------------------------------|------------|-------------|-------------|------------------|--------------|
| Alaska  | Arctic Tundra                      | C  | 10-40              | alluvial-marine                               | Sandy      | 7.3 (4.6)   | 17.6 (3.4)  | 1.6 (2.8)<br>1.8 | 16.9 (3.4)   |
|         | Arctic Tundra                      | C  | <10                | eolian, sand                                  | Sandy      | 11.1 (4.9)  | 21.3 (10.3) | (11.4)           | 20.4 (10.4)  |
|         | Arctic Tundra                      | C  | >40                | glaciomarine                                  | Silty      | 8 (NA)      | 28 (NA)     | 1.8 (NA)         | 27.3 (NA)    |
|         | Bering Taiga                       | D  | >40                | eolian, loess                                 | Silty      | 10.5 (NA)   | 7.3 (NA)    | 1.1 (NA)         | 5.9 (NA)     |
|         | Bering Taiga                       | S  | 10-40              | fluvial, abandoned terrace                    | Silty      | 9.9 (5.3)   | 6.2 (3.8)   | 0.7 (3.3)<br>0.3 | 5.1 (3.9)    |
|         | Bering Tundra                      | C  | >40                | eolian, loess                                 | Silty      | 5.7 (11.8)  | 1.6 (18)    | (13.7)           | 1.1 (28.5)   |
|         | Intermontane Boreal                | D  | 10-40              | fluvial, abandoned terrace                    | Silty      | 7.1 (NA)    | 2.9 (NA)    | 0.3 (NA)         | 2.4 (NA)     |
| Canada  | Northern Arctic                    | C  | <20                | colluvial fines                               | Sandy Loam | 15.1 (NA)   | 42.9 (NA)   | 5.9 (NA)         | 40.6 (NA)    |
|         | Northern Arctic                    | C  | <10                | till veneer                                   | NA         | 3.7 (NA)    | 57 (NA)     | 2.1 (NA)         | 506.7 (NA)   |
|         | Southern Arctic                    | C  | >20                | glaciofluvial plain                           | Organic    | 7.6 (4.5)   | 5.7 (3.4)   | 0.5 (3)          | 5.3 (3.4)    |
|         | Southern Arctic                    | C  | >20                | till blanket                                  | Clay       | 13.2 (3.8)  | 1.9 (3.2)   | 0.2 (5.3)        | 1.0 (5.0)    |
|         | Southern Arctic                    | D  | <20                | alluvial deposits                             | Loam       | 7.7 (6.2)   | 6.9 (5.3)   | 0.8 (5.2)        | 6.2 (5.4)    |
|         | Taiga Plain                        | D  | <20                | alluvial deposits                             | Loam       | 21.1 (1.4)  | 7.6 (1.7)   | 1.1 (1.8)        | 5.4 (2.4)    |
|         | Taiga Shield                       | D  | <20                | till veneer                                   | Sand       | 8 (13.9)    | 7.0 (1.9)   | 1.0 (1.7)        | 5.8 (1.2)    |
|         | Taiga Shield                       | D  | <20                | undivided                                     | Sand       | 10.8 (3.0)  | 2.7 (2.1)   | 0.3 (3.4)        | 1.7 (3.0)    |
| Russia  | East Siberian Taiga                | C  | >40                | alluvial-limnetic                             | Coarse     | 5.3 (10.1)  | 1 (8.8)     | 0 (11.5)         | 0.7 (9.6)    |
|         | East Siberian Taiga                | C  | >40                | alluvial-limnetic                             | Medium     | 4.9 (3.8)   | 2.5 (4.2)   | 0.4 (4.7)        | 2.0 (5.0)    |
|         | Northeast Siberian Coastal Tundra  | C  | >40                | alluvial-limnetic                             | Medium     | 8.3 (NA)    | 18.2 (NA)   | 0.8 (NA)         | 17.6 (NA)    |
|         | Northeast Siberian Taiga           | C  | >40                | alluvial-limnetic                             | Organic    | 16.7 (10.2) | 3.5 (6.3)   | 0.4 (5.7)        | 2.3 (6.4)    |
|         | Northeast Siberian Taiga           | C  | >40                | alluvial-limnetic cover, loess like deposits, | Coarse     | 5.3 (10.1)  | 1 (8.8)     | 0 (11.5)         | 0.7 (9.6)    |
|         | Northeast Siberian Taiga           | C  | >40                | loess and clays                               | Medium     | 1.1 (NA)    | 3.3 (NA)    | 0.2 (NA)<br>1.4  | 3.1 (NA)     |
|         | Northwest Russian-Nov. Zem. Tundra | C  | <20                | glacial                                       | Medium     | 6.3 (28.1)  | 12.7 (21.4) | (24.6)<br>2.1    | 11.5 (21.5)  |
|         | Taimyr-Central Siberian Tundra     | C  | >40                | alluvial-limnetic                             | Organic    | 10.3 (10.5) | 38.8 (50.1) | (27.5)           | 37.8 (51.3)  |
|         | Taimyr-Central Siberian Tundra     | C  | 20-40              | alluvial-limnetic                             | Organic    | 7.2 (NA)    | 23.8 (NA)   | 2.5 (NA)         | 23.1 (NA)    |
|         | Taimyr-Central Siberian Tundra     | C  | 20-40              | glacial                                       | Medium     | 3.6 (NA)    | 4.5 (NA)    | 0.4 (NA)         | 4.1 (NA)     |
|         | West Siberian Taiga                | S  | 20-40              | organic deposits                              | Organic    | 16.7 (2.2)  | 20.2 (2.1)  | 3 (2.4)          | 17.6 (2.2)   |
|         | Yamal-Gydan Tundra                 | C  | >40                | marine                                        | Medium     | 8.9 (5.0)   | 3.6 (3.1)   | 0.4 (2.9)        | 2.7 (3.2)    |
|         | Yamal-Gydan Tundra                 | C  | 20-40              | marine                                        | Banded     | 6.1 (2.3)   | 8.6 (2.7)   | 0.8 (2.7)        | 7.8 (2.7)    |

## 6 Discussion

### 6.1 Classification accuracy and ~~uncertainty~~ variability

The accuracy of the individual waterbody maps depends on the spectral and spatial properties of the remote sensing imagery employed for classification as well as the classification method. In general, open water surfaces show a high contrast to the surrounding land area in all utilized spectral bands, *i.e.*, panchromatic, near-infrared, and X-band, since water absorbs most of the incoming radiation (Grosse et al., 2005; Muster et al., 2013). Ground surveys of waterbody surface area were available for only a few study sites. Accuracy ranged between 89 % for object-oriented mapping of multispectral (Lara et al., 2015), 93 % for object-oriented mapping of panchromatic imagery (Andresen and Lougheed, 2015), and more than 95 % for a supervised maximum likelihood classification of multispectral aerial images (Muster et al., 2012). Errors in the classification may be largely due to commission errors, *i.e.* the spectral signal is misinterpreted as water where in reality it may be land surface. Many shallow ponds and pond/lake margins are characterized by vegetation growing or floating in the water which cannot be adequately classified from single-band imagery (Sannel and Brown, 2010). PeRL classifications dating from early August are likely most affected since abundance of aquatic plants peaks around that time of year. In some cases, even multispectral imagery cannot distinguish between lake and land because floating vegetation mats fully underlain by lake water may spectrally appear like a land surface (Parsekian et al. 2011).

Seasonal processes, such as snowmelt, progressing thaw depth, evaporation, and precipitation do affect the extent of surface water. Waterbody maps therefore reflect the local water balance at the time of image acquisition. Seasonal reduction of surface water extent, however, is largest in the first 2 weeks following snowmelt (Bowling et al., 2003). All PeRL maps date from the late summer season so that snowmelt and the early summer season are excluded. Changes of water extent in late summer are primarily due to evaporation and precipitation. In a study area on the Barrow Peninsula, Alaska, we find that the open water extent varies between 6 % and 8 % between the beginning and end of August of different years. However, the effect is hard to quantify as other factors such as spectral properties and resolution also impact classifications of different times at the same site. Seasonal variations may be larger in case of heavy rain events right before image acquisition but ultimately depend on local conditions which control surface and subsurface runoff.

~~However, the effect is hard to quantify as other factors such as spectral properties and resolution also impact classifications of different times at the same site.~~

~~Different map products were compared for a common area of the Barrow Peninsula. Waterbody areal fraction was 10 % for a Quickbird derived dataset from on August 1, 2002, 6 % for a Kompsat dataset from August 2, 2009, and 8 % for a TerraSAR X dataset from August 25, 2009. The multispectral classification used on the Quickbird image also identifies waterbodies with aquatic vegetation with an areal fraction of 3 %.~~

### 6.2 Uncertainty of circum-arctic map

Uncertainties regarding the upscaling-extrapolation of waterbody distributions arise from (i) the combination of different waterbody maps, (ii) the accuracy of the underlying regional permafrost maps, and (iii) the level of generalization inherent in the PL-permafrost landscape units.



PeRL is a static database that presents late summer inundation conditions only. The effect of image acquisition in relation to rainfall may impact the waterbodies at the site level. However, the effect is hard to quantify as other factors such as spectral properties and resolution also impact classifications of different times at the same site. Waterbody statistics of permafrost landscapes are derived from diverse remote sensing imagery. Imagery dates from different years and months and features different image properties. However, Average size distributions over large regions probably reduce the importance effect of seasonal variability or image properties on the average statistic is small compared to the natural variability within and between permafrost landscape units, as site level variability within the thaw period is being traded for the large spatial coverage of waterbodies across permafrost landscapes.

Permafrost landscapes present a unified circum-arctic categorization to upscale waterbody distributions. Due to the uncertainty and scale of the regional ~~PL-maps~~PLM, however, it cannot be expected that non-overlapping waterbody maps within the same ~~PL-permafrost landscape~~ have the same size distribution. The regional ~~permafrost landscape-maps~~PLM are themselves extrapolated products where finite point sources of information have been used to describe larger spatial domains. No error or uncertainty measure, however, was reported for the regional maps. In addition, the variables used to describe permafrost landscapes present the dominant classes within the landscape unit. Thus, certain waterbody maps may represent landscape subtypes that are not represented by the reported average ~~characteristic~~statistic. For example, two permafrost landscapes have been classified in the Lena Delta in Northern Siberia. The southern and eastern part of the delta is characterized by continuous permafrost with ground ice volumes larger than 40 %, alluvial-limnetic deposits and organic substrate. Local studies differentiate this region further based on geomorphological differences and ground ice content. The Yedoma ice complex in the southern part features much higher ground ice content of up to 80 % and higher elevations than the eastern part which is however not resolved in the Russian ~~PL-map~~PLM. These sub-regional landscape variations are also reflected in the waterbody size distributions which are significantly different for the southern and eastern part of the delta. In the averaged statistics this is indicated by a high relative error of 11 % and 28 % for areal fraction of waterbodies and ponds, respectively, and about 50 % for waterbody density estimates. In this case, the ~~PL-permafrost landscape~~ unit in that area does not adequately reflect the known distribution of ground ice and geomorphology and demonstrates the need to further improve ~~PL-maps~~PLM in the future.

### 6.3 Potential use of database and future development

Waterbody maps and distribution statistics are most accurate at site-level. At this scale, maps can be used as a baseline to detect changes in surface inundation for seasonal, inter-annual and decadal periods. Site-level size distributions can also be used to validate statistical extrapolation methods which have previously been used to extrapolate from coarser databases to finer scales (Downing et al., 2006; Seekell et al., 2010). Validation of these approaches have since questioned the validity of power laws for smaller lakes and ponds but have also been limited to waterbodies as small as  $1.0E+04 \text{ m}^2$ , i.e., 2 orders of magnitude larger than the minimum size in PeRL data sets.

The circum-arctic map provides spatially extrapolated information for larger-scale applications. Coarse-scale global databases such as the Global Lakes and Wetlands database (GLWD) by Lehner and Döll (2004) are used in global Earth System Models to represent the water fraction in model grid cells (Wania et al., 2013). The GLWD renders a reliable inventory of lakes larger  $1 \text{ km}^2$  (Lehner and Döll, 2004). Compared to the GLWD, PeRL inventoried up to 21 % additional waterbody area. Moreover, ponds are the most frequent waterbody type with 45 to 99 %. In light of observed scaling of biogeochemical processes with waterbody surface area (Wik et al., 2016), PeRL results emphasize the need to include

waterbodies of  $1.0\text{E}+06\text{ m}^2$  and smaller in conjunction with their size distributions in physical and biogeochemical models of the high latitude surface. Moreover, the combination of waterbody size distributions with ~~PL-landscape~~ properties can motivate further study for process-based predictive simulations both at the site and regional scale. However, users should be aware of the map's uncertainty when using it to upscale landscape properties such as methane or heat fluxes. For this purpose, users should refer to the reported spatial variability, confidence class and extensive metadata.

PeRL's ~~PL-permafrost landscape~~ units represent the least common denominator across the Arctic where ~~PL-landscape~~ properties have been strongly generalized. More detailed information about landscape properties was available for the Canadian database and Northern Alaska (Jorgensen et al., 2014) but not for central and southern Alaska or Russia. We suggest that more detailed and accurate classes of ground ice as well as further refinement of physiography within the broad lowland zone will likely explain differences in waterbody distributions between different maps in the same ~~PL-permafrost landscape~~. Regionally different methodologies currently prohibit to compare permafrost landscapes between ~~regions~~ and to extrapolate across regions. The harmonization of landscape properties, delineation of common terrain units and extrapolation methods for the whole Arctic require a coordinated circum-arctic effort.

Our extrapolated area ( $1.4\text{E}+06\text{ km}^2$ ) represents only 7.0 % of the current estimated Arctic permafrost area (Brown et al., 1998) but about 17 % of the current Arctic permafrost lowland area (below 300 m a.s.l.) where most of the Arctic lakes are located (Lehner and Döll, 2004; Smith et al., 2007; Grosse et al., 2013). With a few exceptions, the reported sites are predominantly located in coastal areas. Especially the lake-rich permafrost lowlands of Canada and Central Siberia are underrepresented, despite their large spatial coverage. Underrepresented landscape types are areas with discontinuous, isolated or sporadic permafrost, as well as areas in boreal regions. PeRL maps are conservative estimates of surface inundation as most maps capture open water only and do not include ponds smaller than  $1.0\text{E}+02\text{ m}^2$  in size. PeRL maps with resolutions of less than 1 m, ~~however~~, indicate the presence of many waterbodies smaller than the current threshold of  $1.0\text{E}+02\text{ m}^2$ . These very small waterbodies as well as water areas with emerged vegetation are highly productive environments that require attention in future mapping efforts.

## 7 Data availability

Waterbody maps, study area boundaries and maps of regional permafrost landscapes including link to detailed metadata are available at <https://doi.pangaea.de/10.1594/PANGAEA.868349>.

## 8 Conclusions

PeRL maps and statistics provide a great resource for a large suite of applications across the Arctic such as resource and habitat management, hydrological and ecological modeling, pond and lake change detection, and upscaling of biogeochemical processes. PeRL ~~maps~~ includes waterbodies with surface areas ~~from  $1.0\text{E}+06\text{ m}^2$  down to as small as  $1.0\text{E}+02\text{ m}^2$~~  which complements available global databases and increases waterbody size resolution by 2–4 orders of magnitude. Ponds, ~~i.e. waterbodies with surface areas smaller than  $1.0\text{E}+04\text{ m}^2$~~  are the dominant waterbody type found in all study areas across the Arctic. This demonstrates the need to include small waterbodies and parameterize size distributions in global land surface models. Furthermore, PeRL presents a baseline that allows future studies to investigate direction and magnitude of past and future Arctic surface inundation. The current compilation of high-resolution ~~surface inundation-waterbody~~ maps underlines the need to produce more: vast areas in all regions are still unmapped regarding

small waterbodies, especially the Canadian lowlands and boreal regions of Russia. Future mapping efforts should therefore focus equally on ~~both~~-filling gaps and ~~also~~-monitoring inventoried sites. The combination of waterbody statistics and landscape properties has great potential to improve our understanding of environmental drivers of surface inundation in permafrost lowlands. However, permafrost landscape maps need to be improved by increasing the level of detail as well by harmonizing mapping and extrapolation approaches across Arctic regions.

## Appendix A

**Table A1: Metadata and references for climate data and permafrost depth. MAAT—mean annual air temperature, TP—total precipitation.**

| map ID                            | country | MAAT & TP period     | climate data source                                                        | permafrost thickness source                   |
|-----------------------------------|---------|----------------------|----------------------------------------------------------------------------|-----------------------------------------------|
| abi001                            | Sweden  | 2006–2011, 1997–2007 | MAAT: Johannsson et al. (2013), TP: Abisko Station, www.polar.se/abisko    | Akerman and Johansson (2008), Dobinski (2010) |
| arg001, arg002                    | Russia  | 1999–2011            | Boike et al. (2013)                                                        | Yershov et al. (1991)                         |
| bar001, bar002,<br>bar003, bar004 | Alaska  | 1981–2010            | National Climatic Data Center (2016): Barrow-W Post Rogers Airport AK US   | Brown et al. (1980)                           |
| byk001                            | Russia  | 1984–1994            | Rivas-Martínez (2008)                                                      | Grosse et al. (2008)                          |
| byl001                            | Canada  | N/A                  | MAAT: Godin et al. (2014), TP: Fortier et al. (2007)                       | Smith and Burgess (2000)                      |
| che001, che002                    | Russia  | 1984–1994            | Rivas-Martínez (2008)                                                      | Grosse et al. (2008)                          |
| ele001, ele002, eel003            | Alaska  | 1981–2010            | National Climatic Data Center (2016): Barrow-W Post Rogers Airport, AK, US | Sellmann and Brown (1973)                     |
| esk001                            | Canada  | 1981–2010            | Environment Canada (2016), Tuktoyaktuk A                                   | Taylor and Judge (1981)                       |
| fis001                            | Alaska  | 1981–2010            | National Climatic Data Center (2016): Kuparuk AK US                        | Jorgensen et al. (2008)                       |
| fir001, fir002, fir003            | Russia  | 1999–2011            | Boike et al. (2013)                                                        | Yershov et al. (1991)                         |
| gpr001                            | Canada  | 1971–2000            | Bouchard et al. (2014), Environment Canada (2012)                          | Smith and Burgess (2002)                      |
| hbl001                            | Canada  | 1971–2000            | Sannel and Kuhry (2011), Environment Canada                                | N/A                                           |
| ice003                            | Russia  | 1999–2011            | Boike et al. (2013)                                                        | Yershov et al. (1991)                         |
| ind001, kyt001                    | Russia  | 1961–1990            | Chokurdakh WMO station 21946                                               | N/A                                           |
| kol001                            | Russia  | 1996–2015            | Bukhta Ambarchik meteorostation (WMO ID 25034)                             | Yershov et al. (1991)                         |
| kol002                            | Russia  | 1996–2015            | Andrushkino meteorostation (WMO ID 25017)                                  | Yershov et al. (1991)                         |
| kur001, kur002                    | Russia  | 1999–2011            | Boike et al. (2013)                                                        | Yershov et al. (1991)                         |
| log001                            | Russia  | 1961–1990            | Khatanga WMO station 20891                                                 | N/A                                           |
| mdn001                            | Canada  | 1981–2010            | Environment Canada (2016), Inuvik A                                        | Burn and Kokelj (2009)                        |
| mdw001                            | Canada  | 1981–2010            | Environment Canada (2016), Inuvik A                                        | Burn and Kokelj (2009)                        |
| ole001                            | Russia  | 1948–1960            | Rivas-Martínez (2008)                                                      | Grosse et al. (2008)                          |
| pbp001                            | Canada  | 1981–2010            | Environment Canada (2016), Resolute Cars                                   | Smith and Burgess (2002)                      |

| map ID                                 | country | MAAT & TP period | climate data source                                                | permafrost thickness source |
|----------------------------------------|---------|------------------|--------------------------------------------------------------------|-----------------------------|
| ime001, kep001, kpe002, kpc003         | Alaska  | 1981–2010        | National Climatic Data Center (2016); Kuparuk AK US                | N/A                         |
| ric001                                 | Canada  | 1981–2010        | Environment Canada (2016); Inuvik A                                | Burn (2002)                 |
| rog001, rog002, rog003, rog004, rog005 | Russia  | 1961–1990        | Vorkuta, Hugelius et al. (2011)                                    | Rivkin et al. (2008)        |
| sam001                                 | Russia  | 1999–2011        | Boike et al. (2013)                                                | Yershov et al. (1991)       |
| sei001, sei002                         | Russia  | N/A              | Sjöberg et al. (2013)                                              | Rivkin et al. (2008)        |
| ksi001                                 | Alaska  | 1981–2010        | National Climatic Data Center (2016); Noma Municipal Airport AK US | Jorgensen et al. (2008)     |
| sur001                                 | Russia  | N/A              | Krementski et al. (2003)                                           | Krementski et al. (2003)    |
| tbr001, tea001                         | Canada  | 1981–2010        | Environment Canada (2016); Yellowknife A                           | N/A                         |
| tav001                                 | Sweden  | 1971–2000        | Sannel and Kuhry (2011)                                            | Sannel and Kuhry (2011)     |
| tuk001                                 | Canada  | 1981–2010        | Environment Canada (2016); Tuktoyaktuk A                           | Taylor and Judge (1981)     |
| yak001                                 | Russia  | 1930–2010        | Fedorov et al. (2014)                                              | Yershov et al. (1991)       |
| yam001, yam002                         | Russia  | 2004–2013        | Marre-Sale, Leibman et al. (2014)                                  | Yershov et al. (1991)       |
| yfl001                                 | Alaska  | 1981–2010        | National Climatic Data Center (2016); Central Number 2 AK US       | Walvoord et al. (2012)      |
| yuk001, yuk002                         | Alaska  | 1981–2010        | National Climatic Data Center (2016); Bethel Airport AK US         | N/A                         |

## Appendix B

**Table B1: Metadata about base imagery, classification accuracy and classification objects, and associated references. Classifications that include partial lakes, rivers or streams are labelled “no” in the “clean” column.**

| map ID                                               | filenames                                                                          | base imagery                                                | acquisition date<br>[YYYY-MM-DD] | reso-<br>lution<br>[m] | accuracy                               | classes                                              | min size<br>[m <sup>2</sup> ] | Clean | reference                        |
|------------------------------------------------------|------------------------------------------------------------------------------------|-------------------------------------------------------------|----------------------------------|------------------------|----------------------------------------|------------------------------------------------------|-------------------------------|-------|----------------------------------|
| abi0012010xxxx                                       | abi0012010xxxx_ortho_nplaea                                                        | Orthophoto<br>(Lantmäteriet,<br>12014/00691); SPOT5;<br>DEM | 2010                             | 1.0                    | >0.71                                  | open water                                           | 21                            | Yes   | this paper                       |
| arg00120110829                                       | arg00120110829_k2_nplaea                                                           | KOMPSAT-2                                                   | 2011-08-29                       | 4.0                    | N/A                                    | open water                                           | 64                            | Yes   | this paper                       |
| arg0022009xxxx;<br>fir0032009xxxx;<br>ice0032009xxxx | arg0022009xxxx_re_nplaea;<br>fir0032009xxxx_re_nplaea;<br>ice0032009xxxx_re_nplaea | RapidEye                                                    | 2009–2011                        | 5.0                    | 0.85——in<br>comparison<br>to Komsat II | open water                                           | 100                           | No    | Bartsch and Seifert (2012)       |
| bar00119480804                                       | bar00119480804_ai_nplaea                                                           | aerial imagery                                              | 1948-08-04                       | 0.7                    | N/A                                    | open water                                           | 16                            | Yes   | Andresen et al. (2015)           |
| bar00120020802                                       | bar00120020802_qb_nplaea                                                           | Quickbird                                                   | 2002-08-02                       | 0.7                    | N/A                                    | open water                                           | 16                            | Yes   | Andresen et al. (2015)           |
| bar00120080730                                       | bar00120080730_qb_nplaea                                                           | Quickbird                                                   | 2008-07-30                       | 0.7                    | N/A                                    | open water                                           | 16                            | yes   | Andresen et al. (2015)           |
| bar00120100810                                       | bar00120100810_wv2_nplaea                                                          | WorldView-2                                                 | 2010-08-10                       | 0.5                    | 0.93                                   | open water                                           | 16                            | yes   | Andresen et al. (2015)           |
| byk00120060709                                       | byk00120060709_spot_nplaea                                                         | SPOT-5                                                      | 2006-07-09                       | 2.5                    | N/A                                    | open water                                           | 30                            | yes   | Grosse et al. (2008)             |
| byl00120100902                                       | byl00120100902_geo_nplaea                                                          | GeoEye-1                                                    | 2010-09-02                       | 0.5                    | N/A                                    | open water                                           | 4                             | yes   | this paper                       |
| che00120020709                                       | che00120020709_iko2_nplaea                                                         | IKONOS-2                                                    | 2002-07-09                       | 1.0                    | N/A                                    | open water                                           | 30                            | yes   | Grosse et al. (2008)             |
| che00220090724                                       | che00220090724_alos_nplaea                                                         | ALOS PRISM                                                  | 2009-07-24                       | 3.0                    | 0.97                                   | open water                                           | 36                            | yes   | Widhalm et al. (2014a;<br>2014b) |
| ele00120090825,<br>wle00120090825,                   | ele00120090825_tsx_nplaea;<br>bar00220090825_tsx_nplaea                            | TerraSAR-X                                                  | 2009-08-25                       | 2.5                    | N/A                                    | open——water,<br>water——with<br>emersed<br>vegetation | 25                            | yes   | this paper                       |
| ele00220020801,<br>wle00220020801                    | ele00220020801_qb_nplaea;<br>bar00320020801_qb_nplae                               | Quickbird                                                   | 2002-08-01                       | 0.6                    | 0.89 to 0.95                           | open water                                           | 7.8                           | yes   | Lara et al. (2015)               |
| ele00320090802,                                      | ele00320090802_k2_nplaea,                                                          | KOMPSAT-2                                                   | 2009-08-02                       | 4.0                    | N/A                                    | open water                                           | 64                            | yes   | Muster et al. (2013)             |

| map-ID                            | filenames                                               | base imagery                                     | acquisition date<br>[YYYY-MM-DD] | reso-<br>lution<br>[m] | accuracy                                    | classes    | min size<br>[m <sup>2</sup> ] | Clean | reference                                           |
|-----------------------------------|---------------------------------------------------------|--------------------------------------------------|----------------------------------|------------------------|---------------------------------------------|------------|-------------------------------|-------|-----------------------------------------------------|
| wlc00320090802                    | bar00420090802_k2_nplaea                                |                                                  |                                  |                        |                                             |            |                               |       |                                                     |
| ele004200808xx                    | ele004200808xx_tr_qb_nplaea                             | Quickbird                                        | 2008-08                          | 0.6                    | >0.75                                       | open-water | 1.5                           | yes   | Lara et al. (2015)                                  |
| esk00120090727                    | esk00120090727_tsx_nplaea                               | TerraSAR-X                                       | 2009-07-27                       | 2.5                    | N/A                                         | open-water | 36                            | yes   | this paper                                          |
| fir00120090906                    | fir00120090906_k2_nplaea                                | KOMPSAT-2                                        | 2009-09-06                       | 4.0                    | N/A                                         | open-water | 64                            | yes   | this paper                                          |
| fir00220110711                    | fir00220110829_k2_nplaea                                | KOMPSAT-2                                        | 2011-08-29                       | 4.0                    | N/A                                         | open-water | 64                            | yes   | this paper                                          |
| fis00120020715                    | fis00120020715_orri_nplaea                              | Airborne-Orthorectified<br>Radar Imagery (IFSAR) | 2002-07-15                       | 1.3                    | N/A                                         | open-water | 100                           | Yes   | Jones et al. (2013)                                 |
| grp00119590707                    | grp00119590708_ai_nplaea                                | aerial imagery                                   | 1959-07-07                       | 0.4                    | N/A                                         | open-water | 17                            | yes   | Bouchard et al. (2014)                              |
| grp00120060707                    | grp00120060708_qb_nplaea                                | QuickBird                                        | 2006-07-07                       | 0.61                   | N/A                                         | open-water | 13                            | yes   | Bouchard et al. (2014)                              |
| hbl00119540701                    | hbl00119540701_ai_nplaea                                | aerial imagery                                   | 1954-07-01                       | 1.0                    | N/A                                         | open-water | 51                            | yes   | Sannel and Brown (2010);<br>Sannel and Kuhry (2011) |
| hbl00119740617                    | hbl00119740617_ai_nplaea                                | aerial imagery                                   | 1974-06-17                       | 1.0                    | N/A                                         | open-water | 53                            | yes   | Sannel and Brown (2010);<br>Sannel and Kuhry (2011) |
| hbl00120060706                    | hbl00120060706_qb_nplaea                                | QuickBird                                        | 2006-07-06                       | 0.6                    | N/A                                         | open-water | 55                            | yes   | Sannel and Brown (2010);<br>Sannel and Kuhry (2011) |
| imc00120040725                    | imc00120040725_qb02_nplaea                              | QuickBird-2                                      | 2004-07-25                       | 0.7                    | N/A                                         | open-water | 100                           | yes   | this paper                                          |
| ind00120090907                    | ind00120090907_wv1_nplaea                               | WorldView-1                                      | 2009-09-07                       | 0.5                    | N/A                                         | open-water | 100                           | yes   | this paper                                          |
| kol00119650721,<br>kol00219650721 | kol00119650721_eor_nplaea,<br>kol00219650721_eor_nplaea | CORONA                                           | 1965-07-21                       | 5.0                    | N/A                                         | open-water | 200                           | yes   | this paper                                          |
| kur00120100805                    | kur00120100805_geo_nplaea                               | Geoeye                                           | 2010-08-05                       | 1.0                    | N/A                                         | open-water | 4                             | yes   | this paper                                          |
| kur00220080926                    | kur00220080926_ap_nplaea                                | ALOS PRISM                                       | 2008-09-26                       | 2.5                    | RMSE=5.8 m<br>georeference-<br>ing accuracy | open-water | 187                           | yes   | this paper                                          |
| kyt00120070728                    | kyt00120070728_ap_nplaea                                | ALOS PRISM                                       | 2007-07-28                       | 3.0                    | 0.97                                        | open-water | 36                            | yes   | Widhalm et al. (2014a;<br>2014b)                    |
| log00120110811                    | log00120110811_qp_nplaea                                | QuickBird                                        | 2011-08-11                       | 2.4                    | 0.90                                        | open-water | 23                            | yes   | Palmtag et al. (2016)                               |
| mdw00120090921                    | mac00120090921_tsx_nplaea                               | TerraSAR-X                                       | 2009-09-21                       | 2.5                    | N/A                                         | open-water | 36                            | yes   | this paper                                          |
| mdn00120100716                    | mdn00120100716_tsx_nplaea                               | TerraSAR-X                                       | 2010-07-16                       | 2.5                    | N/A                                         | open-water | 64                            | yes   | this paper                                          |

| map-ID                                               | filenames                                                                          | base imagery                         | acquisition date<br>{YYYY-MM-DD} | reso-<br>lution<br>{m} | accuracy               | classes    | min size<br>{m <sup>2</sup> } | Clean | reference                                       |
|------------------------------------------------------|------------------------------------------------------------------------------------|--------------------------------------|----------------------------------|------------------------|------------------------|------------|-------------------------------|-------|-------------------------------------------------|
| ole00120060708                                       | ole00120060708_spot_nplaea                                                         | SPOT-5                               | 2006-07-08                       | 2.5                    | N/A                    | open-water | 30                            | yes   | Grosse et al. (2008)                            |
| pbp00120090813                                       | pbp00120090813_tsx_nplaea                                                          | TerraSAR-X                           | 2009-08-13                       | 2.5                    | N/A                    | open-water | 12                            | yes   | Muster et al. (2013)                            |
| kpc001201007xx,<br>kpc002201007xx,<br>kpc003201007xx | pru001201007xx_ai_nplaea,<br>pru002201007xx_ai_nplaea,<br>pru003201007xx_ai_nplaea | digital true-color aerial<br>imagery | 2010-07-09 and 2010-<br>07-25    | N/A                    | N/A                    | open-water | 1                             | yes   | Walker et al. (2014),<br>Raynolds et al. (2014) |
| rie001201209125                                      | rie001201209125_tsx_nplaea                                                         | TerraSAR-X                           | 2012-09-25                       | 2.5                    | N/A                    | open-water | 8                             | yes   | this paper                                      |
| rog00120070626                                       | rog00120070626_qb_nplaea                                                           | QuickBird                            | 2007-06-26                       | 0.6                    | N/A                    | open-water | 30                            | yes   | Sjöberg et al. (2013)                           |
| rog00219740726                                       | rog00219740726_ai_nplaea                                                           | aerial imagery                       | 1974-07-26                       | 1.0                    | N/A                    | open-water | 28                            | yes   | Sannell and Kuhry (2011)                        |
| rog00220070707                                       | rog00220070707_qb_nplaea                                                           | QuickBird                            | 2007-07-07                       | 0.6                    | N/A                    | open-water | 28                            | yes   | Sannell and Kuhry (2011)                        |
| rog00320070626                                       | rog00320070626_qb_nplaea                                                           | QuickBird-2                          | 2007-06-26                       | 2.4                    | Overall<br>Kappa: 0.68 | open-water | 11                            | yes   | this paper                                      |
| rog00420070704                                       | rog00420070704_qb_nplaea                                                           | QuickBird-2                          | 2007-07-04                       | 2.4                    | Overall<br>Kappa: 0.83 | open-water | 29                            | yes   | this paper                                      |
| rog00520070704                                       | rog00520070704_qb_nplaea                                                           | QuickBird-2                          | 2007-07-04                       | 2.4                    | Overall<br>Kappa: 0.83 | open-water | 11.5                          | yes   | this paper                                      |
| sam001200808xx                                       | sam001200808xx_ai_nplaea                                                           | aerial imagery                       | 2008-08                          | 0.3                    | N/A                    | open-water | 1                             | yes   | Muster et al. (2012)                            |
| sei00120070706                                       | sei00120070706_qb_nplaea                                                           | QuickBird                            | 2007-07-06                       | 0.6                    | N/A                    | open-water | 30                            | yes   | Sjöberg et al. (2013)                           |
| sei00220070706                                       | sei00220070706_qb_nplaea                                                           | QuickBird-2                          | 2007-07-06                       | 2.4                    | Overall<br>Kappa: 0.68 | open-water | 11.5                          | yes   | this paper                                      |
| ksl0012012xxxx                                       | ksl0012012xxxx_spot_nplaea                                                         | SPOT-5                               | 2009-2010                        | 2.5                    | N/A                    | open-water | 25                            | yes   | this paper                                      |
| ksl00119620628                                       | ksl00119620628_cor_nplaea                                                          | Corona KH4                           | 1962-06-28                       | 6.0                    | N/A                    | open-water | 144                           | yes   | this paper                                      |
| sur00120130802                                       | sur00120130802_tsx_nplaea                                                          | TerraSAR-X                           | 2013-08-02                       | 2.0                    | N/A                    | open-water | 16                            | yes   | this paper                                      |
| tbr00120100901,<br>tea00120100901                    | tan00120100901_tsx_nplaea,<br>tan00220100901_tsx_nplaea                            | TerraSAR-X                           | 2010-09-01                       | 2.5                    | N/A                    | open-water | 36                            | yes   | this paper                                      |
| tav00119630831                                       | tav00119630831_ai_nplaea                                                           | aerial imagery                       | 1963-08-31                       | 0.5                    | N/A                    | open-water | 28                            | yes   | Sannell and Kuhry (2011)                        |
| tav00119750810                                       | tav00119750810_ai_nplaea                                                           | aerial imagery                       | 1975-08-10                       | 0.9                    | N/A                    | open-water | 28                            | yes   | Sannell and Kuhry (2011)                        |
| tav00120030702                                       | tav00120030702_iko2_nplaea                                                         | IKONOS                               | 2003-07-02                       | 1.0                    | N/A                    | open-water | 28                            | yes   | Sannell and Kuhry (2011)                        |



| map-ID                            | filenames                 | base imagery   | acquisition date<br>{YYYY-MM-DD} | reso-<br>lution<br>{m} | accuracy                           | classes                                         | min size<br>{m <sup>2</sup> } | Clean | reference                  |
|-----------------------------------|---------------------------|----------------|----------------------------------|------------------------|------------------------------------|-------------------------------------------------|-------------------------------|-------|----------------------------|
| tuk00120120723                    | tuk00120120723_tsx_nplaea | TerraSAR-X     | 2012-07-23                       | 2.5                    | N/A                                | open water                                      | 36                            | yes   | this paper                 |
| yak0012009xxxx                    | yak0012009xxxx_re_nplaea  | RapidEye       | 2009-2011                        | 5.0                    | 0.85<br>comparison<br>with Landsat | open water                                      | 75                            | no    | Bartsch and Seifert (2012) |
| yam00120080824                    | yam00120080824_tsx_nplaea | TerraSAR-X     | 2008-08-24                       | 2.5                    | N/A                                | open water                                      | 36                            | yes   | this paper                 |
| yam00220100820                    | yam00220100820_tsx_nplaea | TerraSAR-X     | 2010-08-20                       | 2.5                    | N/A                                | open water, water with<br>emersed<br>vegetation | 100                           | yes   | this paper                 |
| yfi0012011xxxx                    | yfi0012011xxxx_ai_nplaea  | aerial imagery | 2011-06-18–<br>2011-09-05        | 1.0                    | N/A                                | open water                                      | 4                             | yes   | this paper                 |
| yuk00120090812,<br>yuk00220090812 | yuk00120090812_tsx_nplaea | TerraSAR-X     | 2009-08-12                       | 2.5                    | N/A                                | open water                                      | 36                            | yes   | this paper                 |

**Table B2: Metadata about classification software, algorithm**

| site-ID                                              | software                         | pre-processing                                                                                                                                                                            | classification<br>band(s) | spectral range                                                                                    | classification method             | post-processing | data repository                                                                       |
|------------------------------------------------------|----------------------------------|-------------------------------------------------------------------------------------------------------------------------------------------------------------------------------------------|---------------------------|---------------------------------------------------------------------------------------------------|-----------------------------------|-----------------|---------------------------------------------------------------------------------------|
| abi0012010xxxx                                       | GDAL, SAGA-GIS,<br>Orfeo toolbox | 1. Image segmentation using<br>Orthophoto-RGB (1m) and DEM<br>(2m), minimum object size 130m <sup>2</sup> ;<br>2. Classification of watermask: SVM<br>classifier using Red band and slope | red (1m) +<br>slope (2m)  | 610–680 nm                                                                                        | segmentation (SVM)                | N/A             |                                                                                       |
| arg00120110829                                       | ENVI 4.8,<br>ArcGIS 12           | georeferencing                                                                                                                                                                            | Near-infrared             | 760–900 nm                                                                                        | density slice                     | N/A             |                                                                                       |
| arg0022009xxxx,<br>fir0032009xxxx,<br>ice0032009xxxx | N/A                              | georeferencing, histogram matching<br>routine for radiometric<br>normalization, mosaicking                                                                                                | B, G, R, RE, NIR          | blue: 440–510 nm;<br>green: 520–590 nm;<br>red: 630–685 nm;<br>RE: 690–730 nm;<br>NIR: 760–850 nm | object-oriented<br>classification | N/A             | <a href="http://geo.tuwien.ac.at/permafrost/">http://geo.tuwien.ac.at/permafrost/</a> |
| bar00119480804                                       | ENVI 4.4                         | coregistration and orthorectification<br>using an image-to-image correction<br>(RMSE of 1.0 m)                                                                                            | panchromatic              | N/A                                                                                               | object-oriented<br>classification | N/A             |                                                                                       |

| site ID                        | software                    | pre-processing                                                                           | classification band(s) | spectral range                                          | classification method               | post-processing                                                                                                              | data repository                                                                                           |
|--------------------------------|-----------------------------|------------------------------------------------------------------------------------------|------------------------|---------------------------------------------------------|-------------------------------------|------------------------------------------------------------------------------------------------------------------------------|-----------------------------------------------------------------------------------------------------------|
| bar00120020802                 | ENVI 4.4                    | coregistration and orthorectification using an image-to-image correction (RMSE of 1.0 m) | panchromatic           | 445–900 nm                                              | object-oriented classification      | N/A                                                                                                                          |                                                                                                           |
| bar00120080730                 | ENVI 4.4                    | coregistration and orthorectification using an image-to-image correction (RMSE of 1.0 m) | panchromatic           | 445–900 nm                                              | object-oriented classification      | N/A                                                                                                                          |                                                                                                           |
| bar00120100810                 | ENVI 4.4                    | coregistration and orthorectification using an image-to-image correction (RMSE of 1.0 m) | panchromatic           | 450–800 nm                                              | object-oriented classification      | N/A                                                                                                                          |                                                                                                           |
| byk00120060709                 | ArcGIS                      | georeferenced to topographic maps of scale 1:100,000                                     | panchromatic           | 480–710 nm                                              | density slice                       |                                                                                                                              |                                                                                                           |
| byl00120100902                 | Geomatica 2015, ArcGIS 10.2 | pan-sharpening, orthorectification                                                       | B, G, R, NIR           | 450–510 nm;<br>510–580 nm;<br>655–690 nm;<br>780–920 nm | unsupervised k-means classification | spatial filter on raster to remove classification imperfections, removed < 4 m <sup>2</sup> ; major rivers, streams, shadows |                                                                                                           |
| che00120020709                 | ArcGIS                      | orthorectification                                                                       | panchromatic           | 760–850 nm                                              | density slice                       | removed: shadows, stream water bodies, man-made structures; included: lake ice, turbid and shallow water                     |                                                                                                           |
| che00220090724                 | N/A                         | N/A                                                                                      | panchromatic           | 520–770 nm                                              | density slice                       | N/A                                                                                                                          | <a href="https://doi.pangaea.de/10.1594/PANGAEA.834200">https://doi.pangaea.de/10.1594/PANGAEA.834200</a> |
| ele00120090825, bar00220090825 | ENVI 4.4                    | gamma filter (11x11 pixel)                                                               | X-Band                 | wavelength 31 nm; frequency 9.6 GHz                     | k-means classification              | N/A                                                                                                                          |                                                                                                           |
| ele00220020801, bar00320020801 | ArcGIS 10.2, eCognition 9.1 | principle component analysis on raster bands, pan-sharpening                             | R, B, G, IR            | 450–520 nm;<br>560–600 nm;<br>630–690 nm;<br>760–890 nm | object-oriented classification      | N/A                                                                                                                          |                                                                                                           |
| ele00320090802, bar00420090802 | ENVI 4.8, ArcGIS 10         | georeferencing                                                                           | Near-infrared          | 760–900 nm                                              | density slice                       | partial lakes, rivers, streams and cloud shadows removed                                                                     | <a href="https://doi.pangaea.de/10.1594/PANGAEA.786073">https://doi.pangaea.de/10.1594/PANGAEA.786073</a> |

| site ID                           | software                           | pre-processing                                                                                                      | classification band(s) | spectral range                                          | classification method                  | post-processing                    | data repository |
|-----------------------------------|------------------------------------|---------------------------------------------------------------------------------------------------------------------|------------------------|---------------------------------------------------------|----------------------------------------|------------------------------------|-----------------|
| ele004200808xx                    | ArcGIS 10.2;<br>eCognition 9.2     | principle component analysis on<br>raster bands;<br>pan-sharpening                                                  | R,B,G,IR               | 450–520 nm;<br>560–600 nm;<br>630–690 nm, 760–890<br>nm | object-oriented<br>classification      | N/A                                |                 |
| esk00120090727                    | ENVI 4.8;<br>ArcGIS 10             | lee filter (3x3 pixel), gamma filter<br>(11x11 pixel)                                                               | X-Band                 | wavelength 31 mm;<br>frequency 9.6 GHz                  | k-means classification                 | river, streams;<br>shadows removed |                 |
| fir00120090906                    | ENVI 4.8;<br>ArcGIS 10             | georeferencing                                                                                                      | Near-infrared          | 760–900 nm                                              | density slice                          | river, streams;<br>shadows removed |                 |
| fir00220110711                    | ENVI 4.8;<br>ArcGIS 10             | georeferencing                                                                                                      | Near-infrared          | 760–900 nm                                              | density slice                          | river, streams;<br>shadows removed |                 |
| fis00120020715                    | ENVI 4.5                           | N/A                                                                                                                 | panchromatic           | 135 or 270 MHz                                          | density slice                          | N/A                                |                 |
| grp00119590707                    | ArcGIS 10.0                        | Scanning (1814 dpi); georeferencing<br>(RMSE = 1.8m (4.2pix))                                                       | black and white        | N/A                                                     | manual                                 | N/A                                |                 |
| grp00120060707                    | ArcGIS 10.0                        | geometric correction (cubic<br>convolution resampling)                                                              | panchromatic           | 450–900 nm                                              | manual                                 | N/A                                |                 |
| hbl00119540701                    | ENVI 4.5;<br>ENVI 4.7;<br>ArcGIS 9 | resampling of pixel resolution to 0.6<br>m, georeferenced to QuickBird<br>image from 2006 with RMSE of<br>0.38–1.42 | panchromatic           | N/A                                                     | manual delineation                     | N/A                                |                 |
| hbl00119740617                    | ENVI 4.5;<br>ENVI 4.7;<br>ArcGIS 9 | resampling of pixel resolution to 0.6<br>m, georeferenced to QuickBird<br>image from 2006 RMSE of<br>0.38–1.42      | panchromatic           | N/A                                                     | manual delineation                     | N/A                                |                 |
| hbl00120060706                    | ENVI 4.5;<br>ENVI 4.7;<br>ArcGIS 9 | N/A                                                                                                                 | panchromatic           | 405–1053 nm                                             | manual delineation                     | N/A                                |                 |
| ime00120040725                    | ENVI 5.0;<br>ArcGIS 10.3           | orthorectification                                                                                                  | panchromatic           | 760–850 nm                                              | density slice                          | river, streams;<br>shadows removed |                 |
| ind00120090907                    | ENVI 5.0;<br>ArcGIS 10.3           | orthorectification                                                                                                  | panchromatic           | 400–900 nm                                              | density slice, opening<br>filter 3x3   | river, streams;<br>shadows removed |                 |
| kol00119650721,<br>kol00219650721 | ArcGIS 9                           | georeferencing                                                                                                      | panchromatic           | N/A                                                     | manual delineation                     | N/A                                |                 |
| kur00120100805                    | ENVI 4.8;<br>ArcGIS 10             | pan-sharpening, orthorectification<br>(RMSE: 0.36m)                                                                 | Near-infrared          | 760–900 nm                                              | unsupervised k-means<br>classification | river, streams;<br>shadows removed |                 |
| kur00220080926                    | PCI Geomatica;<br>ArcGIS 9         | orthorectification based on own<br>stereo DEM                                                                       | panchromatic           | 520–770 nm                                              | manual delineation                     | N/A                                |                 |

| site ID                                              | software                           | pre-processing                                                                                                                                                                                 | classification band(s) | spectral range                         | classification method                        | post-processing                                                                                         | data repository                                                                                                                                                                                                                     |
|------------------------------------------------------|------------------------------------|------------------------------------------------------------------------------------------------------------------------------------------------------------------------------------------------|------------------------|----------------------------------------|----------------------------------------------|---------------------------------------------------------------------------------------------------------|-------------------------------------------------------------------------------------------------------------------------------------------------------------------------------------------------------------------------------------|
| kyt00120070728                                       | ENVI 4.8;<br>ArcGIS 10             | N/A                                                                                                                                                                                            | panchromatic           | 520–770 nm                             | density slice                                | N/A                                                                                                     | <a href="https://doi.pangaea.de/10.1594/PANGAEA.834200">https://doi.pangaea.de/10.1594/PANGAEA.834200</a>                                                                                                                           |
| log00120110811                                       | ENVI 5.1                           | N/A                                                                                                                                                                                            | NIR, R, G, B           | 485–830 nm                             | supervised—maximum-likelihood classification | N/A                                                                                                     |                                                                                                                                                                                                                                     |
| mdw00120090921                                       | ENVI 4.8;<br>ArcGIS 10             | lee filter (3x3 pixel);<br>gamma filter (11x11 pixel)                                                                                                                                          | X-Band                 | wavelength—31 mm;<br>frequency 9.6 GHz | k-means classification                       | river, streams;<br>shadows removed                                                                      |                                                                                                                                                                                                                                     |
| mdn00120100716                                       | ENVI 4.8;<br>ArcGIS 10             | lee filter (3x3 pixel);<br>gamma filter (11x11 pixel)                                                                                                                                          | X-Band                 | wavelength—31 mm;<br>frequency 9.6 GHz | density slice, DN: –28.06 to –14.79          | river, streams;<br>shadows removed                                                                      |                                                                                                                                                                                                                                     |
| ole00120060708                                       | ArcGIS                             | georeferenced to topographic maps of scale 1:100,000                                                                                                                                           | panchromatic           | 480–710 nm                             | density slice                                | shadows, stream-water bodies, man-made structures removed; (lake-ice, turbid and shallow water included |                                                                                                                                                                                                                                     |
| pbp00120090813                                       | ENVI 4.8;<br>ArcGIS 10             | gamma filter (11x11 pixel)                                                                                                                                                                     | X-Band                 | wavelength—31 mm;<br>frequency 9.6 GHz | density slice                                | majority filter (7x7 pixel) to reduce spurious pixels in classification                                 |                                                                                                                                                                                                                                     |
| kpc001201007xx;<br>kpc002201007xx;<br>kpc003201007xx | N/A                                | N/A                                                                                                                                                                                            | R, G, B                | N/A                                    | manual delineation                           | N/A                                                                                                     | <a href="http://geobotanicalportal.gina.alaska.edu/catalogs/10609-prudhoe-bay-cumulative-impact-map-a-raynolds-2014">http://geobotanicalportal.gina.alaska.edu/catalogs/10609-prudhoe-bay-cumulative-impact-map-a-raynolds-2014</a> |
| rie001201209125                                      | ENVI 4.8;<br>ArcGIS 10             | lee filter (3x3 pixel);<br>gamma filter (11x11 pixel)                                                                                                                                          | X-Band                 | wavelength—31 mm;<br>frequency 9.6 GHz | k-means classification                       | river, streams;<br>shadows removed                                                                      |                                                                                                                                                                                                                                     |
| rog00120070626                                       | ArcGIS                             | N/A                                                                                                                                                                                            | panchromatic           | 450–900 nm                             | manual delineation                           | N/A                                                                                                     |                                                                                                                                                                                                                                     |
| rog00219740726                                       | ENVI 4.5;<br>ENVI 4.7;<br>ArcGIS 9 | resampling of pixel resolution to 0.6 m; georeferenced to QuickBird image from 2007 with RMSE of 0.20–1.25; aerial photographs; georeferenced to QuickBird image from 2007 (RMSE of 0.17–1.07) | panchromatic           | 405–1053 nm                            | manual delineation                           | N/A                                                                                                     |                                                                                                                                                                                                                                     |
| rog00220070707                                       | ENVI 4.5;<br>ENVI 4.7;<br>ArcGIS 9 | N/A                                                                                                                                                                                            | panchromatic           | 405–1053 nm                            | manual delineation                           | N/A                                                                                                     |                                                                                                                                                                                                                                     |

| site ID                           | software                                                                              | pre-processing                                                                                                | classification band(s) | spectral range                                                                 | classification method                                                     | post-processing                                                | data repository |
|-----------------------------------|---------------------------------------------------------------------------------------|---------------------------------------------------------------------------------------------------------------|------------------------|--------------------------------------------------------------------------------|---------------------------------------------------------------------------|----------------------------------------------------------------|-----------------|
| rog00320070626                    | Classification in<br>Definiens<br>Professional 5.0;<br>post-processing<br>with ArcGIS | re-georeferenced using field<br>measured GPS points                                                           | B, G, R, Near-IR       | blue: 450–520 nm;<br>green: 520–600 nm;<br>red: 630–690 nm;<br>NIR: 760–890 nm | supervised, see more in<br>INFO_Qbird_<br>classification_<br>version4.pdf | N/A                                                            |                 |
| rog00420070704                    | Classification in<br>Definiens<br>Professional 5.0;<br>post-processing<br>with ArcGIS | re-georeferenced using field<br>measured GPS points                                                           | B, G, R, Near-IR       | blue: 450–520 nm;<br>green: 520–600 nm;<br>red: 630–690 nm;<br>NIR: 760–890 nm | supervised, see more in<br>INFO_Qbird_<br>classification_<br>version4.pdf | N/A                                                            |                 |
| rog00520070704                    | Classification in<br>Definiens<br>Professional 5.0;<br>post-processing with<br>ArcGIS | re-georeferenced using field<br>measured GPS points                                                           | B, G, R, Near-IR       | blue: 450–520 nm;<br>green: 520–600 nm;<br>red: 630–690 nm;<br>NIR: 760–890 nm | supervised, see more in<br>INFO_Qbird_<br>classification_<br>version4.pdf | N/A                                                            |                 |
| sam001200808xx                    | ENVI 4.8;<br>ArcGIS 10                                                                | georeferencing                                                                                                | Near-infrared          | N/A                                                                            | N/A                                                                       | river, streams;<br>shadows removed                             |                 |
| sci00120070706                    | ArcGIS                                                                                | N/A                                                                                                           | panchromatic           | 450–900 nm                                                                     | manual delineation                                                        | N/A                                                            |                 |
| sci00220070706                    | Classification in<br>Definiens<br>Professional 5.0;<br>post-processing with<br>ArcGIS | re-georeferenced using field<br>measured GPS points                                                           | B, G, R, Near-IR,      | blue: 450–520 nm;<br>green: 520–600 nm;<br>red: 630–690 nm;<br>NIR: 760–890 nm | supervised, see more in<br>INFO_Qbird_<br>classification_<br>version4.pdf | N/A                                                            |                 |
| ksa10012012xxxx                   | eCognition 8                                                                          | Principal Component Analysis on<br>visible and IR bands                                                       | G, R, NIR              | N/A                                                                            | object-oriented<br>classification                                         | river, streams;<br>shadows removed                             |                 |
| ksl00119620628                    | ENVI 4.8;<br>ArcGIS 10                                                                | georeferencing to Landsat ETM &<br>TM (RMSE=10 m)                                                             | panchromatic           | N/A                                                                            | density slice                                                             | river, streams;<br>shadows removed                             |                 |
| sur00120130802                    | ENVI 4.8;<br>ArcGIS 10                                                                | orthorectification,<br>gamma filter (10x10m)                                                                  | X-Band                 | wavelength 31 mm;<br>frequency 9.6 GHz                                         | threshold classification                                                  | artefacts from streets<br>and airport were<br>removed manually | PeRL database   |
| tbr00120100901,<br>tea00120100901 | ENVI 4.8;<br>ArcGIS 10                                                                | lee filter (3x3 pixel);<br>gamma filter (11x11 pixel)                                                         | X-Band                 | wavelength 31 mm;<br>frequency 9.6 GHz                                         | k-means classification                                                    | river, streams;<br>shadows removed                             |                 |
| tav00119630831                    | ENVI 4.5;<br>ENVI 4.7;<br>ArcGIS 9                                                    | resampling of pixel resolution to 0.6<br>m, georeferenced to IKONOS image<br>from 2003                        | panchromatic           | N/A                                                                            | manual delineation                                                        | N/A                                                            |                 |
| tav00119750810                    | ENVI 4.5;<br>ENVI 4.7;<br>ArcGIS 9                                                    | resampling of pixel resolution to 0.6<br>m, georeferenced to IKONOS image<br>from 2003 with RMSE of 0.60–2.38 | panchromatic           | N/A                                                                            | manual delineation                                                        | N/A                                                            |                 |

| site ID                           | software                           | pre-processing                                                                       | classification band(s) | spectral range                                                                 | classification method                            | post-processing                    | data repository                                                                       |
|-----------------------------------|------------------------------------|--------------------------------------------------------------------------------------|------------------------|--------------------------------------------------------------------------------|--------------------------------------------------|------------------------------------|---------------------------------------------------------------------------------------|
| tav00120030702                    | ENVI 4.5;<br>ENVI 4.7;<br>ArcGIS 9 | resampling of pixel resolution to 0.6 m                                              | panchromatic           | 760–850 nm                                                                     | manual delineation                               | N/A                                |                                                                                       |
| tuk00120120723                    | ENVI 4.8;<br>ArcGIS 10             | lee filter (3x3 pixel);<br>gamma filter (7x7 pixel)                                  | X-Band                 | wavelength 31 mm;<br>frequency 9.6 GHz                                         | k-means classification                           | river, streams;<br>shadows removed |                                                                                       |
| yak0012009xxxx                    |                                    | georeferencing, histogram matching routine for radiometric normalization, mosaicking | B, G, R, RE, NIR       | blue: 450–520 nm;<br>green: 520–600 nm;<br>red: 630–690 nm;<br>NIR: 760–890 nm | object-oriented classification                   | N/A                                | <a href="http://geo.tuwien.ac.at/permafrost/">http://geo.tuwien.ac.at/permafrost/</a> |
| yam00120080824                    | ENVI 4.8;<br>ArcGIS 10             | lee filter (3x3 pixel);<br>gamma filter (7x7 pixel)                                  | X-Band                 | wavelength 31 mm;<br>frequency 9.6 GHz                                         | density slice, DN: –2.7 to –1.9                  | river, streams;<br>shadows removed |                                                                                       |
| yam00220100820                    | ENVI 4.8;<br>ArcGIS 10             | lee filter (3x3 pixel);<br>gamma filter (11x11 pixel)                                | X-Band                 | wavelength 31 mm;<br>frequency 9.6 GHz                                         | density slice, DN: 0 to 40                       | river, streams;<br>shadows removed |                                                                                       |
| yfl0012011xxxx                    | eCognition 8;<br>ArcGIS 10.2       | orthorectification                                                                   | IR, R, G, B            | 450–520 nm, 560–600 nm, 630–690 nm, 760–890 nm                                 | object-oriented classification                   | N/A                                |                                                                                       |
| yuk00120090812;<br>yuk00220090812 | ENVI 4.8;<br>ArcGIS 10             | lee filter (3x3 pixel);<br>gamma filter (11x11 pixel)                                | X-Band                 | wavelength 31 mm;<br>frequency 9.6 GHz                                         | k-means classification: 15 classes, 5 iterations | river, streams;<br>shadows removed |                                                                                       |

## Appendix C

**Table C1: Description of attributes contained in the polygon attribute table of Alaskan permafrost landscapes (*alaska\_perma\_land.shp*)**

| Field name | Description                                                                                                                                                                                          | Source |
|------------|------------------------------------------------------------------------------------------------------------------------------------------------------------------------------------------------------|--------|
| ECOZONE    | ecozone                                                                                                                                                                                              | AK2008 |
| GEN_GEOL   | generalized geology                                                                                                                                                                                  | AK2008 |
| LITHOLOGY  | texture                                                                                                                                                                                              | AK2008 |
| GROUND_ICE | ground-ice content [vol %]                                                                                                                                                                           | AK2008 |
| PF_EXTENT  | permafrost extent                                                                                                                                                                                    | AK2008 |
| PERMA_LAND | combined label of PF_EXTENT / GROUND_ICE / GEN_GEOL / LITHOLOGY                                                                                                                                      | PeRL   |
| ECOZID     | ecozone ID                                                                                                                                                                                           | PeRL   |
| PERMID     | ID for each polygon in the vector file. The first digit stands for the region (1—Alaska, 2—Canada, 3—Russia), digits 2—6 identify the single polygon, and the last three digits identify the eczone. | PeRL   |
| AREA       | area of polygon in square meters                                                                                                                                                                     | PeRL   |
| PERIMETER  | perimeter of polygon in square meters                                                                                                                                                                | PeRL   |

**Table C2: Description of attributes contained in the polygon attribute table of Canadian permafrost landscapes (*canada\_perma\_land.shp*).**

| field name | description                                                                                                                                                                                          | source |
|------------|------------------------------------------------------------------------------------------------------------------------------------------------------------------------------------------------------|--------|
| ECOZONE    | ecozone                                                                                                                                                                                              | NEF    |
| ECOREGION  | ecoregion                                                                                                                                                                                            | NEF    |
| ECODISTRIC | ecodistrict                                                                                                                                                                                          | NEF    |
| GEN_GEOL   | dominant fraction of generalized (surficial) geology                                                                                                                                                 | NEF    |
| LITHOLOGY  | dominant fraction of texture                                                                                                                                                                         | NEF    |
| GROUND_ICE | dominant fraction of ground-ice content in vol%                                                                                                                                                      | NEF    |
| PF_EXTENT  | dominant fraction of permafrost extent                                                                                                                                                               | NEF    |
| PERMA_LAND | combined label of PF_EXTENT / GROUND_ICE / GEN_GEOL / LITHOLOGY                                                                                                                                      | PeRL   |
| ECOZID     | ecozone ID                                                                                                                                                                                           | PeRL   |
| PERMID     | ID for each polygon in the vector file. The first digit stands for the region (1—Alaska, 2—Canada, 3—Russia), digits 2—6 identify the single polygon, and the last three digits identify the eczone. | PeRL   |
| AREA       | area of polygon in square meters                                                                                                                                                                     | PeRL   |
| PERIMETER  | perimeter of polygon in square meters                                                                                                                                                                | PeRL   |

**Table C3: Description of attributes contained in the polygon attribute table of Russian permafrost landscapes (*russsia\_perma\_land.shp*).**

| field name | description                                                                                                                                                                                                   | source                                                                                                                                                         |
|------------|---------------------------------------------------------------------------------------------------------------------------------------------------------------------------------------------------------------|----------------------------------------------------------------------------------------------------------------------------------------------------------------|
| ECOZONE    | Metadata: <a href="http://maps.tnc.org/files/metadata/TNC_Lands.xml">http://maps.tnc.org/files/metadata/TNC_Lands.xml</a>                                                                                     | Olson et al., 2001<br>Downloaded _____ at<br><a href="http://maps.tnc.org/gis_data.html#TerrestrialEcos">http://maps.tnc.org/gis_data.html#TerrestrialEcos</a> |
| GEN_GEOL   | Surficial geology                                                                                                                                                                                             | LRR, Stolbovoi et al. (2002c)                                                                                                                                  |
| LITHOLOGY  | Texture                                                                                                                                                                                                       | LRR, Stolbovoi et al. (2002c)                                                                                                                                  |
| GROUND_ICE | ground ice content in vol%                                                                                                                                                                                    | LRR                                                                                                                                                            |
| PF_EXTENT  | permafrost extent                                                                                                                                                                                             | LRR                                                                                                                                                            |
| PERMA LAND | combined label of PF_EXTENT / GROUND_ICE / GEN_GEOL / LITHOLOGY                                                                                                                                               | LRR                                                                                                                                                            |
| ECOZID     | ecozone ID                                                                                                                                                                                                    | PeRL                                                                                                                                                           |
| PERMID     | ID for each polygon in the vector file. The first digit stands for the region (1 — Alaska, 2 — Canada, 3 — Russia), digits 2 — 6 identify the single polygon, and the last three digits identify the ecozone. | PeRL                                                                                                                                                           |
| AREA       | area of polygon in square meters                                                                                                                                                                              | PeRL                                                                                                                                                           |
| PERIMETER  | perimeter of polygon in square meters                                                                                                                                                                         | PeRL                                                                                                                                                           |

**Table C4: Description of attributes contained in the polygon attribute table of circum-arectic permafrost landscapes (*PeRL\_study\_area.shp*).**

| field name | description                                                         |
|------------|---------------------------------------------------------------------|
| country    | country                                                             |
| Map_ID     | ID of individual waterbody map                                      |
| site       | site name                                                           |
| MAAT       | mean annual air temperature [°C]                                    |
| TP         | mean annual total precipitation [mm]                                |
| PE_DEPTH   | Permafrost depth [m]                                                |
| lat        | latitude coordinate of polygon centroid in decimal degrees (WGS84)  |
| long       | longitude coordinate of polygon centroid in decimal degrees (WGS84) |
| AREA       | area of polygon in square metres                                    |
| AREA_SQKM  | area of polygon in square kilometres                                |



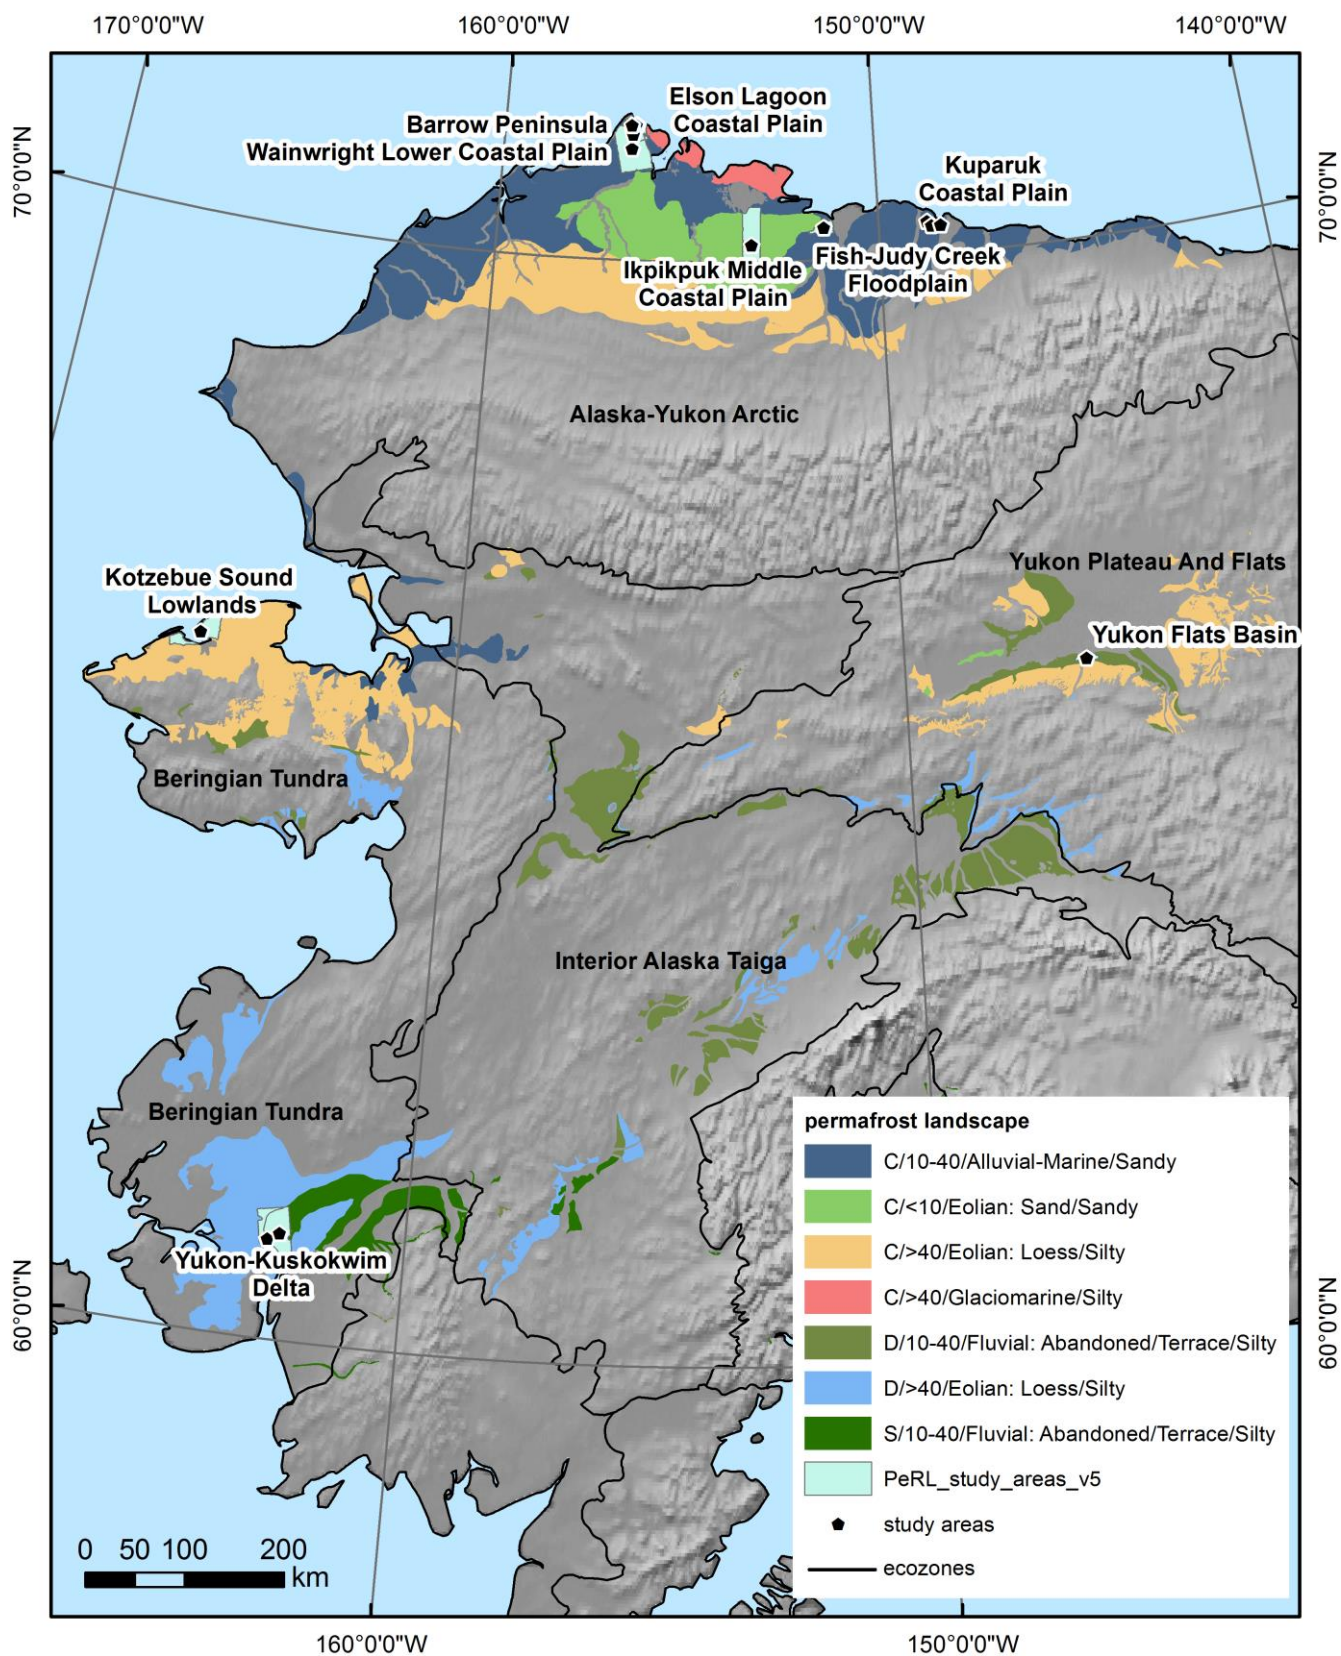

**Figure AD1: Study areas and associated permafrost landscapes in Alaska.** Legend lists type of ~~physiography~~ permafrost extent (C-continuous, D-discontinuous, S-sporadic), ground ice content [vol%], surficial geology and lithology. Shadowed labels name study areas with waterbody maps. Black lines and labels denote ecozones.

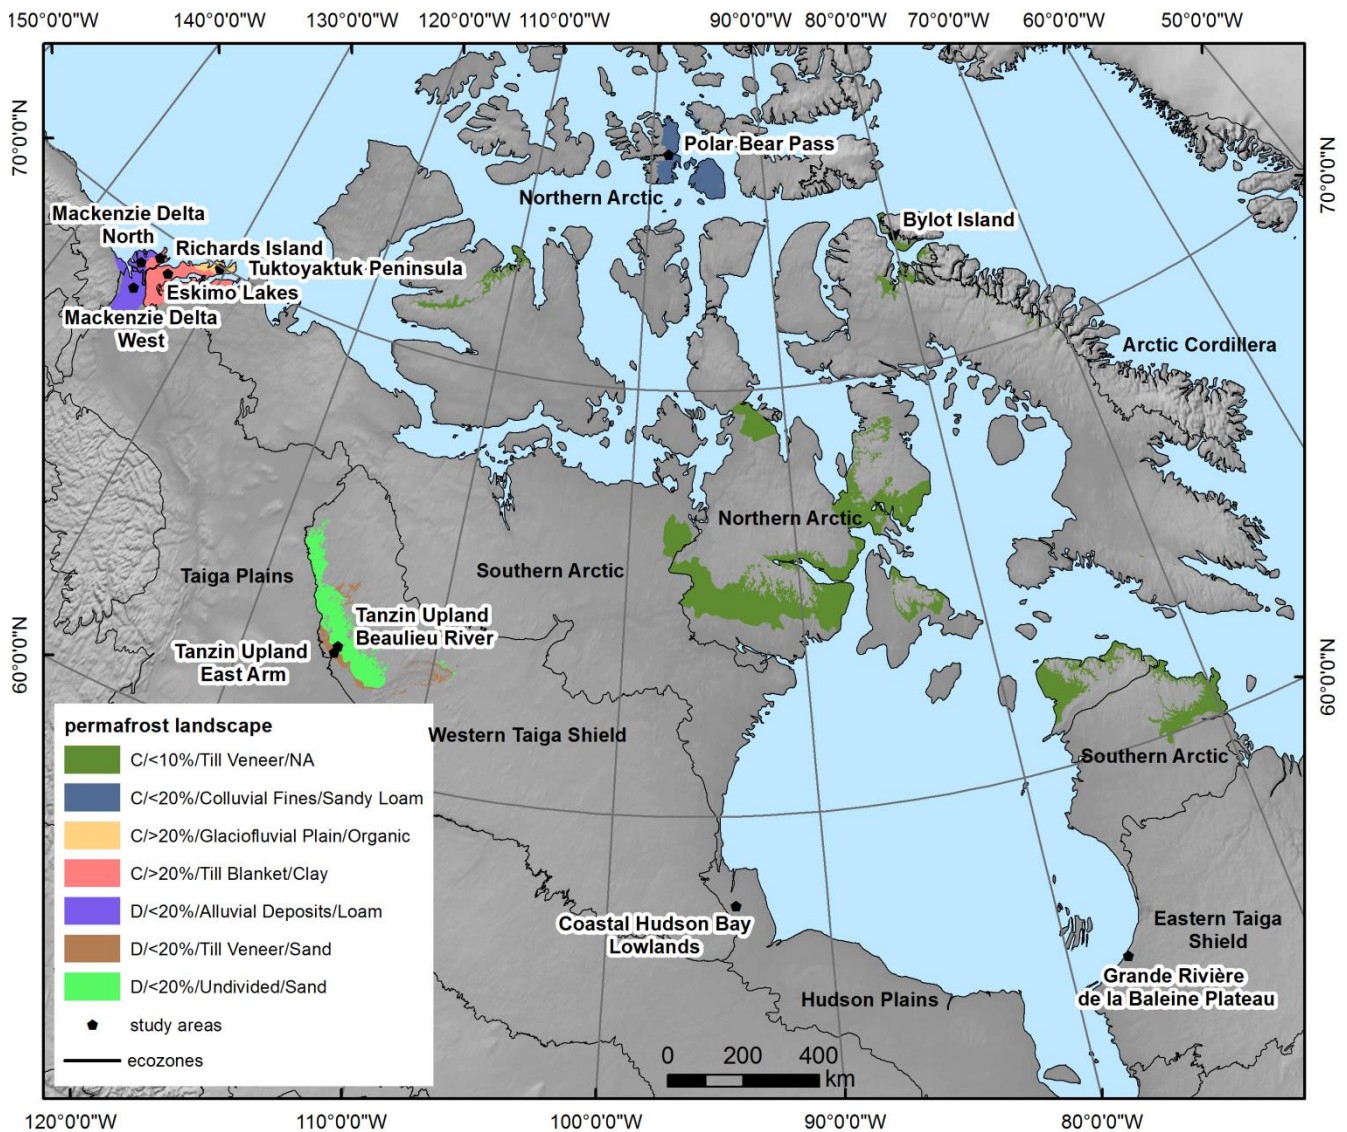

**Figure AD2: Study areas and associated permafrost landscapes in Canada.** Legend lists type of ~~physiography~~ permafrost extent (C-continuous, D-discontinuous, S-sporadic), ground ice content [vol%], surficial geology and lithology. Shadowed labels name study areas with waterbody maps. Black lines and labels denote ecozones.



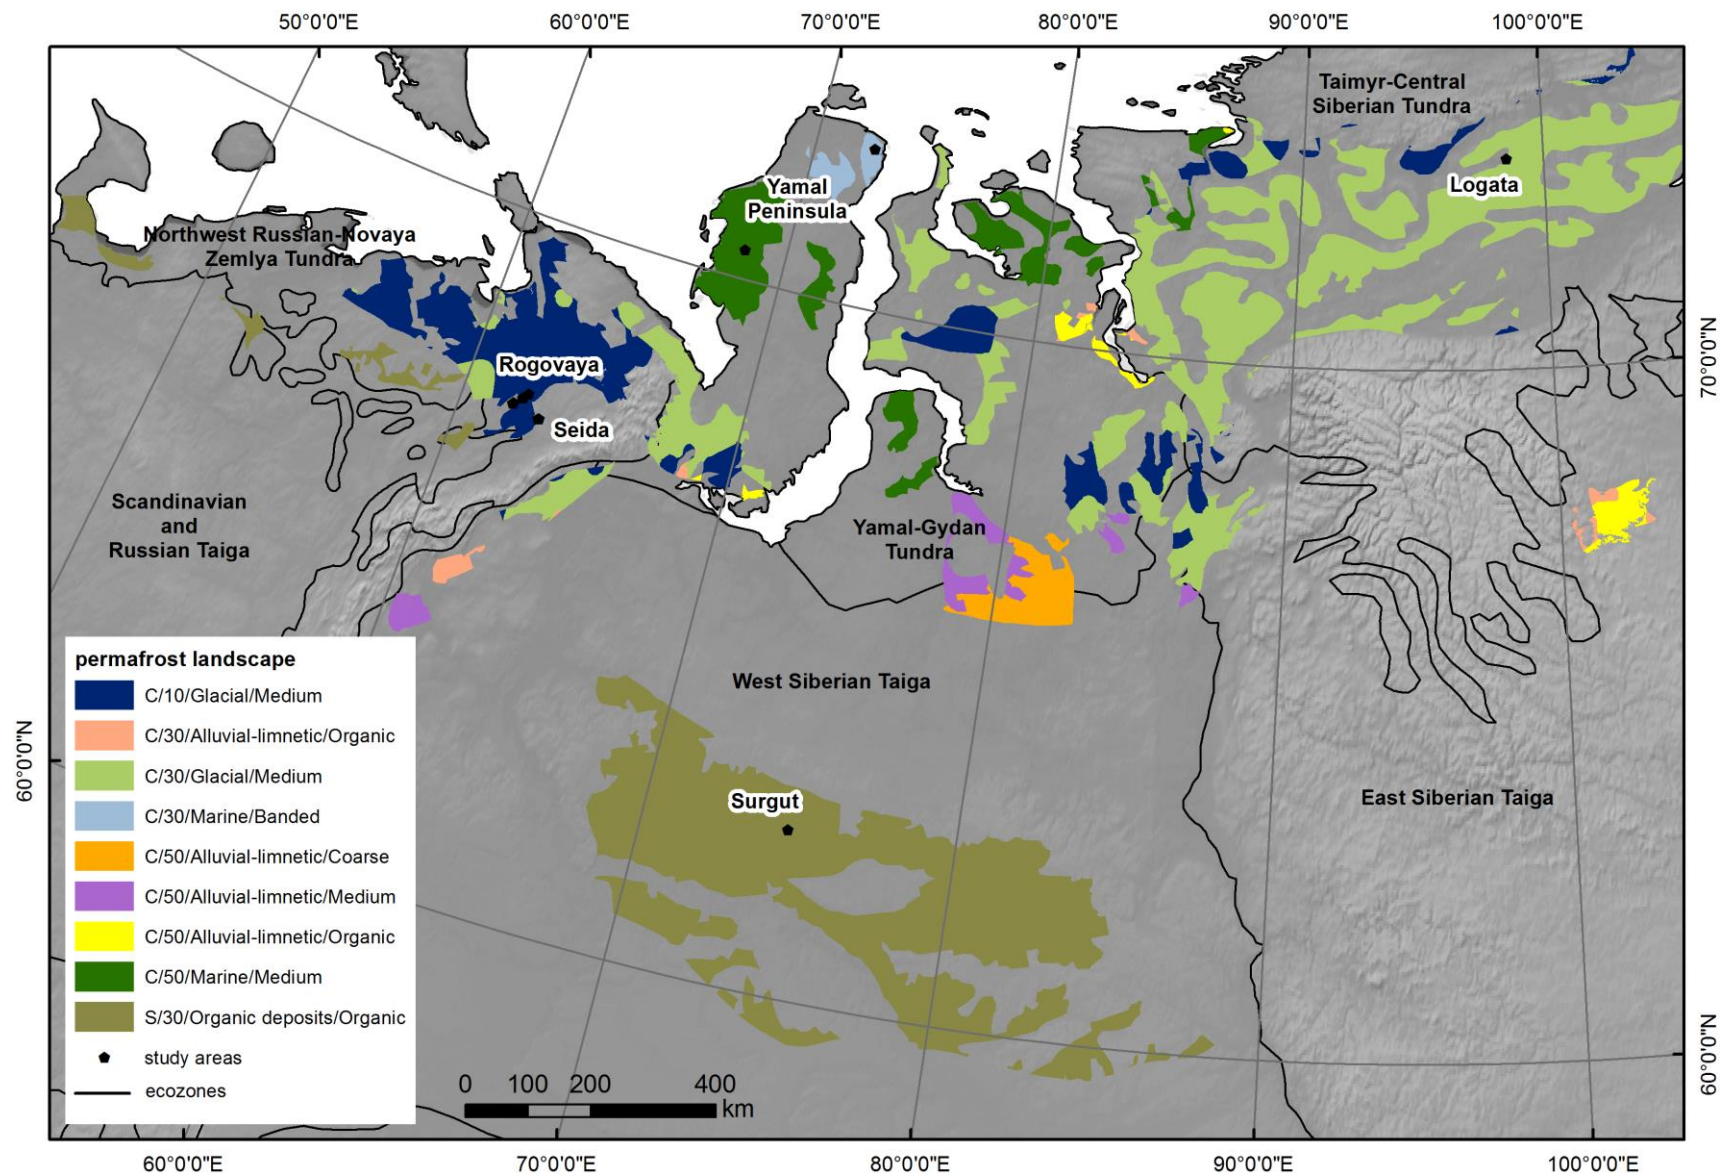

**Figure AD3: Study areas and associated permafrost landscapes in East Russia.** Legend lists type of ~~physiography~~, permafrost extent (C-continuous, D-discontinuous, S-sporadic), ground ice content [vol%], surficial geology and lithology. Shadowed labels name study areas with waterbody maps. Black lines and labels denote ecozones.

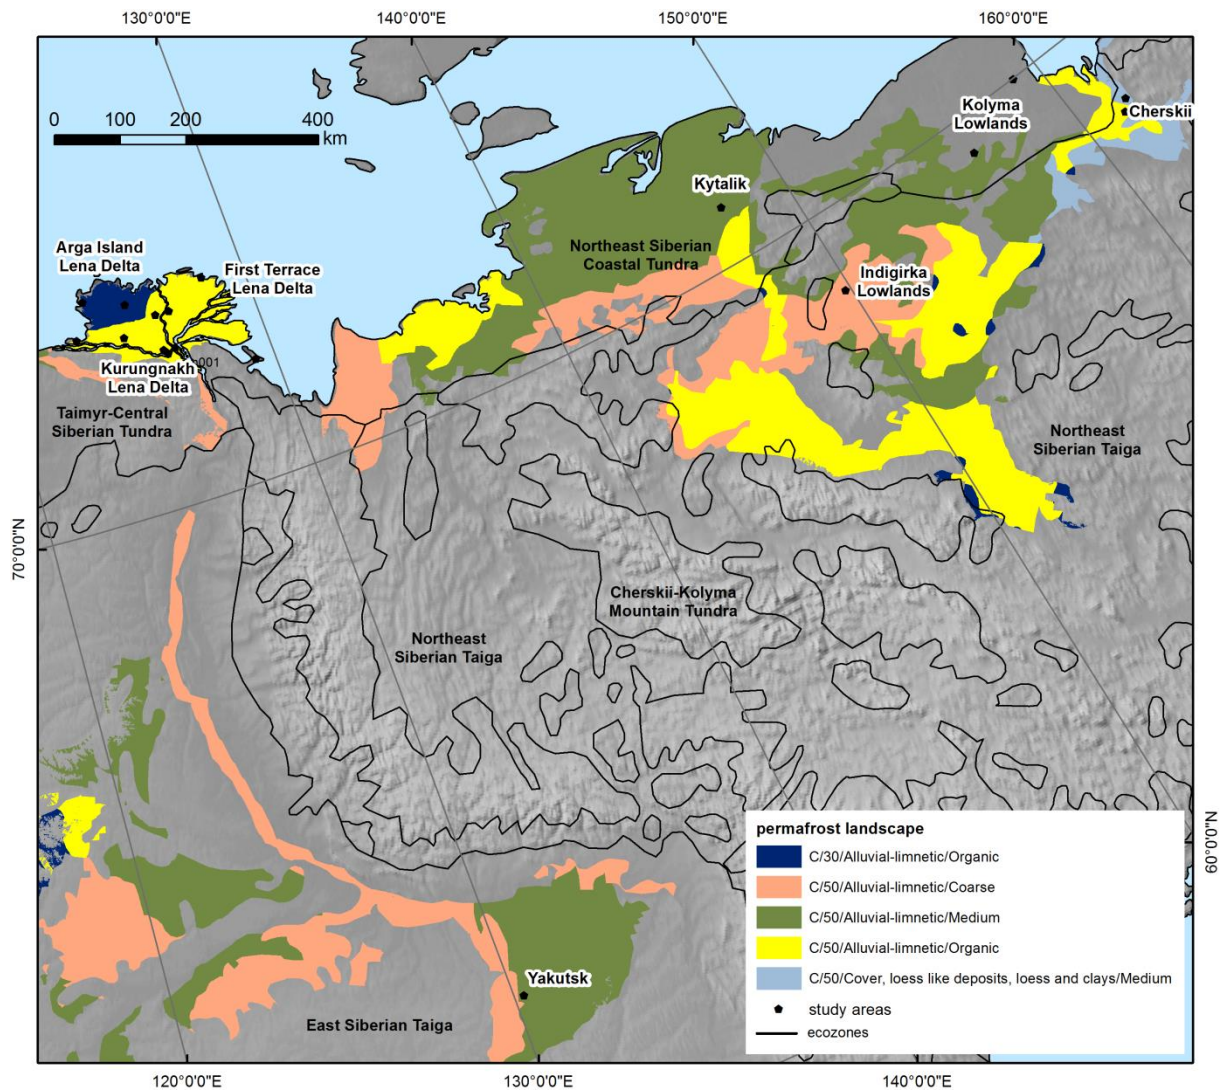

**Figure AD4: Study areas and associated permafrost landscapes in West Russia.** Legend lists type of ~~physiography~~, permafrost extent (C-continuous, D-discontinuous, S-sporadic), ground ice content [vol%], surficial geology and lithology. Shadowed labels name study areas with waterbody maps. Black lines and labels denote ecozones.

## Appendix BE

**Table BE1: Areal fraction and density per waterbody map in Alaska.** Map IDs with an asterisk were not used for extrapolation. F – areal fraction of waterbodies from 1.0 E+02 m<sup>2</sup> to 1.0 E+06 m<sup>2</sup> in size, REF – relative error of fraction for map subsets of 10x10 km. D – waterbody density per km<sup>2</sup>, RED – relative error of density, PF – pond areal fraction for waterbodies from 1.0 E+02 m<sup>2</sup> to smaller than 1.0 E+04 m<sup>2</sup>, REPF – relative error of pond fraction, PD – pond density, REPD – relative error of pond density.

| <u>Mmap ID</u>                                          | <u>Mmap</u><br><u>areaexten</u><br><u>t</u><br><u>[km<sup>2</sup>]</u> | <b>F</b><br>[%] | <b>REF</b><br>[%] | <b>D</b><br>[# per km <sup>2</sup> ] | <b>RED</b><br>[%] | <b>PF</b><br>[%] | <b>REPF</b><br>[%] | <b>PD</b><br>[# per km <sup>2</sup> ] | <b>REPD</b><br>[%] |
|---------------------------------------------------------|------------------------------------------------------------------------|-----------------|-------------------|--------------------------------------|-------------------|------------------|--------------------|---------------------------------------|--------------------|
| bar00119480804                                          | 1.9E+01                                                                | 14              | N/A               | 114                                  | N/A               | 8                | N/A                | 112                                   | N/A                |
| bar00120020802                                          | 1.9E+01                                                                | 10              | N/A               | 78                                   | N/A               | 5                | N/A                | 76                                    | N/A                |
| bar00120080730                                          | 1.9E+01                                                                | 11              | N/A               | 78                                   | N/A               | 6                | N/A                | 76                                    | N/A                |
| bar00120100810                                          | 1.9E+01                                                                | 10              | N/A               | 77                                   | N/A               | 6                | N/A                | 76                                    | N/A                |
| <del>bar002wlc001</del> 20090825                        | 1.4E+03                                                                | 7               | 5                 | 17                                   | 3                 | 2                | 3                  | 17                                    | 3                  |
| <del>bar00320020801+wlc</del><br><del>00220020801</del> | 1.5E+02                                                                | 11              | N/A               | 39                                   | N/A               | 3                | N/A                | 38                                    | N/A                |
| <del>bar00420090802+wlc</del><br><del>00320090802</del> | 3.0E+02                                                                | 6               | N/A               | 13                                   | N/A               | 1                | N/A                | 12                                    | N/A                |
| elc00120090825                                          | 1.3E+02                                                                | 7               | N/A               | 18                                   | N/A               | 1                | N/A                | 17                                    | N/A                |
| elc00220020801                                          | 1.4E+02                                                                | 9               | N/A               | 48                                   | N/A               | 3                | N/A                | 47                                    | N/A                |
| elc00320090802                                          | 5.1E+01                                                                | 7               | N/A               | 18                                   | N/A               | 1                | N/A                | 17                                    | N/A                |
| fis00120020715                                          | 2.4E+02                                                                | 13              | N/A               | 24                                   | N/A               | 2                | N/A                | 23                                    | N/A                |
| imc00120040725                                          | 1.3E+03                                                                | 11              | 5                 | 21                                   | 10                | 2                | 11                 | 20                                    | 10                 |
| kcp001201007xx                                          | 2.1E+01                                                                | 22              | N/A               | 49                                   | N/A               | 7                | N/A                | 46                                    | N/A                |
| kcp002201007xx                                          | 2.0E+01                                                                | 121             | N/A               | 15                                   | N/A               | 0                | N/A                | 1                                     | N/A                |
| kcp003201007xx                                          | 1.9E+01                                                                | 24              | N/A               | 58                                   | N/A               | 7                | N/A                | 55                                    | N/A                |
| ksl00119620628                                          | 5.6E+02                                                                | 11              | 7                 | 12                                   | 11                | 1                | 10                 | 11                                    | 11                 |
| ksl0012012xxxx                                          | 5.6E+02                                                                | 6               | 12                | 2                                    | 18                | 0                | 14                 | 1                                     | 29                 |
| ksl0012012xxxx                                          | 5.6E+02                                                                | 6               | 12                | 2                                    | 18                | 0                | 14                 | 1                                     | 29                 |
| ycb0012011xxxx                                          | 1.0E+02                                                                | 7               | N/A               | 3                                    | N/A               | 0                | N/A                | 2                                     | N/A                |
| yuk00120090812                                          | 1.1E+03                                                                | 10              | 5                 | 6                                    | 4                 | 1                | 3                  | 5                                     | 4                  |
| yuk00220090812                                          | 5.8E+02                                                                | 10              | N/A               | 7                                    | N/A               | 1                | N/A                | 6                                     | N/A                |

**Table BE2: Areal fraction and density per waterbody map in Canada.** Map IDs with an asterisk were not used for extrapolation. F – areal fraction of waterbodies from 1.0 E+02 m<sup>2</sup> to 1.0 E+06 m<sup>2</sup> in size, REF – relative error of fraction for map subsets of 10x10 km. D – waterbody density per km<sup>2</sup>, RED – relative error of density, PF – pond areal fraction for waterbodies from 1.0 E+02 m<sup>2</sup> to smaller than 1.0 E+04 m<sup>2</sup>, REPF – relative error of pond fraction, PD – pond density, REPD – relative error of pond density.

| <u>Map ID</u>    | <u>Map extent</u><br><u>[km<sup>2</sup>]</u> | <u>F</u><br><u>[%]</u> | <u>REF</u><br><u>[%]</u> | <u>D</u><br><u>[# per km<sup>2</sup>]</u> | <u>RED</u><br><u>[%]</u> | <u>PF</u><br><u>[%]</u> | <u>REPF</u><br><u>[%]</u> | <u>PD</u><br><u>[# per km<sup>2</sup>]</u> | <u>REPD</u> <u>[%]</u> |
|------------------|----------------------------------------------|------------------------|--------------------------|-------------------------------------------|--------------------------|-------------------------|---------------------------|--------------------------------------------|------------------------|
| <b>map-ID</b>    | <b>map-area</b>                              | <b>F</b>               | <b>REF</b>               | <b>D</b>                                  | <b>RED</b>               | <b>PF</b>               | <b>REPF</b>               | <b>PD</b>                                  | <b>REPD</b>            |
|                  | <b>[km<sup>2</sup>]</b>                      | <b>[%]</b>             | <b>[%]</b>               | <b>[# per km<sup>2</sup>]</b>             | <b>[%]</b>               | <b>[%]</b>              | <b>[%]</b>                | <b>[# per km<sup>2</sup>]</b>              | <b>[%]</b>             |
| byl001           | 3.64.5E+0                                    | 4                      | N/A                      | 517                                       | N/A                      | 2                       | N/A                       | 571                                        | N/A                    |
| 2016072820100902 | 1                                            |                        |                          |                                           |                          |                         |                           |                                            |                        |
| esk00120090727   | 9.2E+02                                      | 14                     | 4                        | 2                                         | 3                        | 0                       | 4                         | 1                                          | 5                      |
| gpr00119590707*  | 1.8E-01                                      | 11                     | N/A                      | 359                                       | N/A                      | 11                      | N/A                       | 359                                        | N/A                    |
| gpr00120060707*  | 1.8E-01                                      | 11                     | N/A                      | 326                                       | N/A                      | 11                      | N/A                       | 326                                        | N/A                    |
| hbl00119540701*  | 4.0E+00                                      | 36                     | N/A                      | 60                                        | N/A                      | 6                       | N/A                       | 57                                         | N/A                    |
| hbl00119740617*  | 4.0E+00                                      | 38                     | N/A                      | 73                                        | N/A                      | 7                       | N/A                       | 69                                         | N/A                    |
| hbl00120060706*  | 4.0E+00                                      | 35                     | N/A                      | 60                                        | N/A                      | 6                       | N/A                       | 56                                         | N/A                    |
| mdn00120100716   | 1.5E+03                                      | 8                      | 6                        | 7                                         | 5                        | 1                       | 5                         | 6                                          | 5                      |
| mdw00120090921   | 1.6E+03                                      | 21                     | 1                        | 8                                         | 2                        | 1                       | 2                         | 5                                          | 2                      |
| pbp00120090813   | 6.9E+01                                      | 15                     | N/A                      | 43                                        | N/A                      | 6                       | N/A                       | 41                                         | N/A                    |
| ric00120120925   | 5.9E+02                                      | 11                     | 8                        | 2                                         | 10                       | 0                       | 12                        | 1                                          | 11                     |
| tbr00120100901   | 6.9E+02                                      | 11                     | 3                        | 3                                         | 2                        | 0                       | 3                         | 2                                          | 3                      |
| tea00120100901   | 4.6E+02                                      | 8                      | 14                       | 7                                         | 2                        | 1                       | 2                         | 6                                          | 1                      |
| tuk00120120723   | 4.8E+02                                      | 8                      | 5                        | 6                                         | 3                        | 1                       | 3                         | 5                                          | 3                      |

5

**Table BE3: Areal fraction and density per waterbody map in Scandinavia.** Map IDs with an asterisk were not used for extrapolation. F – areal fraction of waterbodies from 1.0 E+02 m<sup>2</sup> to 1.0 E+06 m<sup>2</sup> in size, REF – relative error of fraction for map subsets of 10x10 km. D – waterbody density per km<sup>2</sup>, RED – relative error of density, PF – pond areal fraction for waterbodies from 1.0 E+02 m<sup>2</sup> to smaller than 1.0 E+04 m<sup>2</sup>, REPF – relative error of pond fraction, PD – pond density, REPD – relative error of pond density.

| <u>Map ID</u>  | <u>Map extent</u><br><u>[km<sup>2</sup>]</u> | <u>F</u><br><u>[%]</u> | <u>REF</u><br><u>[%]</u> | <u>D</u><br><u>[# per km<sup>2</sup>]</u> | <u>RED</u><br><u>[%]</u> | <u>PF</u><br><u>[%]</u> | <u>REPF</u><br><u>[%]</u> | <u>PD</u><br><u>[# per km<sup>2</sup>]</u> | <u>REPD</u> <u>[%]</u> |
|----------------|----------------------------------------------|------------------------|--------------------------|-------------------------------------------|--------------------------|-------------------------|---------------------------|--------------------------------------------|------------------------|
| <b>map-ID</b>  | <b>map-area</b>                              | <b>F</b>               | <b>REF</b>               | <b>D</b>                                  | <b>RED</b>               | <b>PF</b>               | <b>REPF</b>               | <b>PD</b>                                  | <b>REPD</b>            |
|                | <b>[km<sup>2</sup>]</b>                      | <b>[%]</b>             | <b>[%]</b>               | <b>[# per km<sup>2</sup>]</b>             | <b>[%]</b>               | <b>[%]</b>              | <b>[%]</b>                | <b>[# per km<sup>2</sup>]</b>              | <b>[%]</b>             |
| abi0012010xxxx | 3.8E+01                                      | 6                      | N/A                      | 5                                         | N/A                      | 1                       | N/A                       | 4                                          | N/A                    |
| tav00119630831 | 8.5E-01                                      | 15                     | N/A                      | 40                                        | N/A                      | 4                       | N/A                       | 34                                         | N/A                    |
| tav00119750810 | 8.5E-01                                      | 17                     | N/A                      | 64                                        | N/A                      | 7                       | N/A                       | 59                                         | N/A                    |
| tav00120030702 | 8.5E-01                                      | 12                     | N/A                      | 53                                        | N/A                      | 6                       | N/A                       | 50                                         | N/A                    |

10



**Table BE4: Areal fraction and density per waterbody map in Russia.** Map IDs with an asterisk were not used for extrapolation. F – areal fraction of waterbodies from 1.0 E+02 m<sup>2</sup> to 1.0 E+06 m<sup>2</sup> in size, REF – relative error of fraction for map subsets of 10x10 km. D – waterbody density per km<sup>2</sup>, RED – relative error of density, PF – pond areal fraction for waterbodies from 1.0 E+02 m<sup>2</sup> to smaller than 1.0 E+04 m<sup>2</sup>, REPF – relative error of pond fraction, PD – pond density, REPD – relative error of pond density.

| <u>Map ID</u>                                | <u>Map</u>              | <u>F</u>   | <u>REF</u> | <u>D</u>                      | <u>RED</u> | <u>PF</u>  | <u>REPF</u> | <u>PD</u>                     | <u>REPD[%]</u> |
|----------------------------------------------|-------------------------|------------|------------|-------------------------------|------------|------------|-------------|-------------------------------|----------------|
|                                              | <u>extent</u>           | <u>[%]</u> | <u>[%]</u> | <u>[# per km<sup>2</sup>]</u> | <u>[%]</u> | <u>[%]</u> | <u>[%]</u>  | <u>[# per km<sup>2</sup>]</u> |                |
|                                              | <u>[km<sup>2</sup>]</u> |            |            |                               |            |            |             |                               |                |
| <b>map-ID</b>                                | <b>map-area</b>         | <b>F</b>   | <b>REF</b> | <b>D</b>                      | <b>RED</b> | <b>PF</b>  | <b>REPF</b> | <b>PD</b>                     | <b>REPD</b>    |
|                                              | <b>[km<sup>2</sup>]</b> | <b>[%]</b> | <b>[%]</b> | <b>[# per km<sup>2</sup>]</b> | <b>[%]</b> | <b>[%]</b> | <b>[%]</b>  | <b>[# per km<sup>2</sup>]</b> | <b>[%]</b>     |
| arg00120110829                               | 2.0E+02                 | 7          | N/A        | 24                            | N/A        | 2          | N/A         | 23                            | N/A            |
| arg0022009xxxx*                              | 5.0E+03                 | 9          | 2          | 10                            | 2          | 1          | 2           | 9                             | 2              |
| byk00120060709*                              | 1.7E+02                 | 8          | N/A        | 29                            | N/A        | 1          | N/A         | 28                            | N/A            |
| che00120020709                               | 2.2E+02                 | 1          | N/A        | 3                             | N/A        | 0          | N/A         | 3                             | N/A            |
| che00220090724                               | 3.4E+02                 | 17         | 10         | 4                             | 6          | 0          | 6           | 2                             | 6              |
| fir00120090906                               | 1.5E+02                 | 9          | N/A        | 36                            | N/A        | 2          | N/A         | 35                            | N/A            |
| <a href="#">fir00220110829arg00320110829</a> | 2.2E+02                 | 13         | N/A        | 19                            | N/A        | 1          | N/A         | 18                            | N/A            |
| fir00232009xxxx*                             | 9.8E+03                 | 12         | 4          | 21                            | 4          | 2          | 4           | 20                            | 4              |
| ice0032009xxxx*                              | 7.9E+02                 | 1          | 29         | 0                             | 22         | 0          | 27          | 0                             | 22             |
| ind00120090907                               | 6.5E+02                 | 5          | 10         | 1                             | 9          | 0          | 12          | 1                             | 10             |
| kol00119659721*                              | 2.4E+03                 | 6          | 4          | 2                             | 10         | 0          | 11          | 2                             | 12             |
| kol00219659721*                              | 2.6E+03                 | 7          | 4          | 1                             | 4          | 0          | 4           | 1                             | 5              |
| kur00120100805*                              | 5.5E+01                 | 8          | N/A        | 14                            | N/A        | 1          | N/A         | 13                            | N/A            |
| kur00220080926                               | 2.5E+02                 | 8          | N/A        | 6                             | N/A        | 1          | N/A         | 5                             | N/A            |
| kyt00120070728                               | 2.6E+02                 | 8          | N/A        | 18                            | N/A        | 1          | N/A         | 18                            | N/A            |
| log00120110811                               | 7.0E+01                 | 4          | N/A        | 5                             | N/A        | 0          | N/A         | 4                             | N/A            |
| ole00120060708                               | 7.5E+01                 | 11         | N/A        | 94                            | N/A        | 4          | N/A         | 93                            | N/A            |
| rog00120070626*                              | 1.0E+01                 | 19         | N/A        | 15                            | N/A        | 3          | N/A         | 12                            | N/A            |
| rog00219740726*                              | 3.4E+00                 | 32         | N/A        | 33                            | N/A        | 3          | N/A         | 28                            | N/A            |
| rog00220070707*                              | 3.4E+00                 | 26         | N/A        | 28                            | N/A        | 2          | N/A         | 24                            | N/A            |
| rog00320070626                               | 6.0E+01                 | 7          | N/A        | 11                            | N/A        | 1          | N/A         | 9                             | N/A            |
| rog00420070704                               | 6.2E+01                 | 10         | N/A        | 11                            | N/A        | 2          | N/A         | 9                             | N/A            |
| rog00520070704                               | 6.3E+01                 | 8          | N/A        | 21                            | N/A        | 2          | N/A         | 19                            | N/A            |
| sam001200808xx*                              | 1.6E+00                 | 14         | N/A        | 116                           | N/A        | 5          | N/A         | 114                           | N/A            |
| sei00120070706*                              | 6.7E+00                 | 8          | N/A        | 49                            | N/A        | 4          | N/A         | 48                            | N/A            |
| sei00220070706                               | 8.3E+01                 | 1          | N/A        | 9                             | N/A        | 1          | N/A         | 8                             | N/A            |
| sur00120130802                               | 1.8E+03                 | 17         | 2          | 20                            | 2          | 3          | 2           | 18                            | 2              |
| yak0012009xxxx                               | 2.0E+03                 | 5          | 4          | 3                             | 4          | 0          | 5           | 2                             | 5              |
| yam00120080824                               | 1.3E+03                 | 9          | 5          | 4                             | 3          | 0          | 3           | 3                             | 3              |
| yam00220100820                               | 1.0E+03                 | 6          | 2          | 9                             | 3          | 1          | 3           | 8                             | 3              |

## Author contributions

S.M. compiled the database, made the analysis and figures, and wrote the manuscript. S.L. assisted in data analysis. All authors contributed to the database compilation and assisted in the writing of the manuscript.

## Acknowledgements

- 5 This work was supported by the Helmholtz Association through a grant (VH-NG 203) awarded to Sina Muster. WJR and CDK were supported by the US Department of Energy, BER, under the NGEE-Arctic project under contract no. DE-AC02-05CH11231. Guido Grosse was supported by ERC #338335. Any use of trade, product, or firm names is for descriptive purposes only and does not imply endorsement by the US Government.
- TerraSAR-X data of Polar Bear Pass, Canada, were acquired through the German Space Agency (DLR) via the project  
10 HYD0546. All other TerraSAR -X data in Alaska, Canada, and Russia were made available by DLR via PI agreement LAN1747 within the framework of the ESA funded DUE GlobPermafrost project, FP7 PAGE21 and the Austrian-Russian joint FWF project COLD Yamal (I 1401). RapidEye classifications have been available through the information system of the ESA DUE Permafrost project. Classifications of Rogovaya and Seida sites in Russia were conducted within the CARBONorth project (contract 036993).
- 15 Quickbird-2 and WorldView-1/-2 images (© DigitalGlobe) of Ikpikpuk Middle Coastal Plain, Alaska, and Indigirka Lowlands, Russia, were provided by the Polar Geospatial Center at the University of Minnesota through NSF AON project 1107481. The Geographic Information Network for Alaska (GINA) provided SPOT imagery of the Kotzebue Sound Lowlands, Alaska.

## References

- 20 Abnizova, A., Siemens, J., Langer, M., and Boike, J.: Small ponds with major impact: The relevance of ponds and lakes in permafrost landscapes to carbon dioxide emissions, *Global Biogeochem. Cycles*, 26, 10.1029/2011gb004237, 2012.
- Andresen, C. G., and Loughheed, V. L.: Disappearing Arctic tundra ponds: Fine-scale analysis of surface hydrology in drained thaw lake basins over a 65 year period (1948–2013), *J Geophys Res-Biogeophys*, 120, 466–479, 2015.
- Bartsch, A., and Seifert, F. M.: The ESA DUE Permafrost project-A service for high latitude research, *Geoscience and Remote Sensing Symposium (IGARSS)*, 2012 IEEE International, 2012, 5222-5225,
- 25 Boike, J., Grau, T., Heim, B., Günther, F., Langer, M., Muster, S., Gouttevin, I., and Lange, S.: Satellite-derived changes in the permafrost landscape of central Yakutia, 2000–2011: Wetting, drying, and fires, *Global Planet. Change*, 139, 116-127, 10.1016/j.gloplacha.2016.01.001, 2016.
- Bouchard, F., Francus, P., Pienitz, R., Laurion, I., and Feyte, S.: Subarctic thermokarst ponds: Investigating recent  
30 landscape evolution and sediment dynamics in thawed permafrost of northern Québec (Canada), *Arct. Antarct. Alp. Res.*, 46, 251-271, 2014.
- Bouchard, F., Laurion, I., Preskienis, V., Fortier, D., Xu, X., and Whiticar, M.: Modern to millennium-old greenhouse gases emitted from ponds and lakes of the Eastern Canadian Arctic (Bylot Island, Nunavut), *Biogeosciences*, 12, 7279-7298, 2015.
- 35 Bowling, L. C., Kane, D. L., Gieck, R. E., Hinzman, L. D., and Lettenmaier, D. P.: The Role of Surface Storage in a Low-Gradient Arctic Watershed, *Water Resour. Res.*, 39, 1087, 10.1029/2002WR001466, 2003.
- CAFF: Arctic Biodiversity Assessment 2013, Arctic Council, Akureyri, Iceland, 2013.
- Carroll, M., Townshend, J., DiMiceli, C., Loboda, T., and Sohlberg, R.: Shrinking lakes of the Arctic: Spatial relationships and trajectory of change, *Geophys. Res. Lett.*, 38, L20406, 2011.
- 40 Feng, M., Sexton, J. O., Channan, S., and Townshend, J. R.: A global, high-resolution (30-m) inland water body dataset for 2000: First results of a topographic–spectral classification algorithm, *Int J Digit Earth*, 9, 113-133, 2015.



- Grosse, G., Romanovsky, V., Walter, K., Morgenstern, A., Lantuit, H., and Zimov, S.: Distribution of Thermokarst Lakes and Ponds at Three Yedoma Sites in Siberia, Ninth International Conference on Permafrost, University of Alaska, Fairbanks, USA, 2008, 551-556.
- Grosse, G., Jones, B., and Arp, C. D.: Thermokarst Lakes, Drainage, and Drained Basins, 8, 29, 10.1016/B978-0-12-374739-6.00216-5, 2013.
- Hinzman, L. D., Deal, C. J., McGuire, A. D., Mernild, S. H., Polyakov, I. V., and Walsh, J. E.: Trajectory of the Arctic as an integrated system, *Ecol. Appl.*, 23, 1837-1868, 10.1890/11-1498.1, 2013.
- Jones, B., Grosse, G., Arp, C., Jones, M., Anthony, K. M. W., and Romanovsky, V.: Modern thermokarst lake dynamics in the continuous permafrost zone, northern Seward Peninsula, Alaska, *J. Geophys. Res.*, 116, G00M03, 10.1029/2011JG001666, 2011.
- Jones, B. M., Gusmeroli, A., Arp, C. D., Strozzi, T., Grosse, G., Gaglioti, B. V., and Whitman, M. S.: Classification of freshwater ice conditions on the Alaskan Arctic Coastal Plain using ground penetrating radar and TerraSAR-X satellite data, *Int. J. Remote Sens.*, 34, 8267-8279, 2013.
- Jorgenson, M., Yoshikawa, K., Kanevskiy, M., Shur, Y., Romanovsky, V., Marchenko, S., Grosse, G., Brown, J., and Jones, B.: Permafrost characteristics of Alaska, Proceedings of the Ninth International Conference on Permafrost, 2008, 121-122.
- Klonus, S., and Ehlers, M.: Pansharpening with TerraSAR-X and optical data, 3rd TerraSAR-X Science Team Meeting, Darmstadt, Germany, 2008, 25-26.
- Kravtsova, V. I., and Rodionova, T. V.: Variations in size and number of thermokarst lakes in different permafrost regions: Spaceborne evidence, *Earth's Cryosphere*, XX, 75-81, 2016.
- Labrecque, S., Lacelle, D., Duguay, C. R., Lauriol, B., and Hawkings, J.: Contemporary (1951-2001) evolution of lakes in the Old Crow Basin, Northern Yukon, Canada: Remote sensing, numerical modeling, and stable isotope analysis, *Arctic*, 225-238, 2009.
- Langer, M., Westermann, S., Walter, A., Anthony, K., Wischniewski, K., and Boike, J.: Frozen ponds: production and storage of methane during the Arctic winter in a lowland tundra landscape in northern Siberia, Lena River Delta, *Biogeosciences*, 12, 977-990, 10.5194/bg-12-977-2015, 2015.
- Lara, M. J., McGuire, A. D., Euskirchen, E. S., Tweedie, C. E., Hinkel, K. M., Skurikhin, A. N., Romanovsky, V. E., Grosse, G., Bolton, W. R., and Genet, H.: Polygonal tundra geomorphological change in response to warming alters future CO<sub>2</sub> and CH<sub>4</sub> flux on the Barrow Peninsula, *Global change biology*, 21, 1634-1651, 2015.
- Laurion, I., Vincent, W. F., MacIntyre, S., Retamal, L., Dupont, C., Francus, P., and Pienitz, R.: Variability in greenhouse gas emissions from permafrost thaw ponds, *Limnol. Oceanogr.*, 55, 115-133, 2010.
- Lehner, B., and Döll, P.: Development and validation of a global database of lakes, reservoirs and wetlands, *J. Hydrol.*, 296, 1-22, 10.1016/j.jhydrol.2004.03.028, 2004.
- Liao, A., Chen, L., Chen, J., He, C., Cao, X., Chen, J., Peng, S., Sun, F., and Gong, P.: High-resolution remote sensing mapping of global land water, *Science China Earth Sciences*, 57, 2305-2316, 2014.
- Liljedahl, A. K., Boike, J., Daanen, R. P., Fedorov, A. N., Frost, G. V., Grosse, G., Hinzman, L. D., Iijima, Y., Jorgenson, J. C., Matveyeva, N., Necsoiu, M., Reynolds, M. K., Romanovsky, V. E., Schulla, J., Tape, K. D., Walker, D. A., Wilson, C. J., Yabuki, H., and Zona, D.: Pan-Arctic ice-wedge degradation in warming permafrost and its influence on tundra hydrology, *Nat. Geosci.*, 9, 312-318, 10.1038/ngeo2674, 2016.
- Marshall, I., Schut, P., and Ballard, M.: A national ecological framework for Canada: Attribute data, Agriculture and AgriFood Canada, Research Branch, Centre for Land and Biological Resources Research, and Environment Canada, State of the Environment Directorate, Ecozone Analysis Branch, Ottawa/Hull, Canada, 1999.
- Muster, S., Langer, M., Heim, B., Westermann, S., and Boike, J.: Subpixel heterogeneity of ice-wedge polygonal tundra: a multi-scale analysis of land cover and evapotranspiration in the Lena River Delta, Siberia, *Tellus B*, 64, 10.3402/tellusb.v64i0.17301, 2012.
- Muster, S.: Decomposing Arctic Land Cover. Implications of heterogeneity and scale for the estimation of energy fluxes in Arctic tundra landscapes, Universität Heidelberg, 121 pp., 2013.
- Muster, S., Heim, B., Abnizova, A., and Boike, J.: Water body distributions across scales: A remote sensing based comparison of three Arctic tundra wetlands, *Remote Sensing*, 5, 1498-1523, 10.3390/rs5041498, 2013.
- Palmtag, J., Ramage, J., Hugelius, G., Gentsch, N., Lashchinskiy, N., Richter, A., and Kuhry, P.: Controls on the storage of organic carbon in permafrost soil in northern Siberia, *European Journal of Soil Science*, 67, 478-491, 2016.
- Paltan, H., Dash, J., and Edwards, M.: A refined mapping of Arctic lakes using Landsat imagery, *Int. J. Remote Sens.*, 36, 5970-5982, 10.1080/01431161.2015.1110263, 2015.
- Ramsar Convention Secretariat: Designating Ramsar sites: strategic framework and guidelines for the future development of the list of wetland for international importance, 4 ed., Ramsar handbooks for the wise use of wetlands, Ramsar Convention Secretariat, Gland, Switzerland, 2010.
- Rautio, M., Dufresne, F., Laurion, I., Bonilla, S., Vincent, W., and Christoffersen, K.: Shallow freshwater ecosystems of the circumpolar Arctic, *Ecoscience*, 18, 204-222, 2011.

- Raynolds, M. K., Walker, D. A., Ambrosius, K. J., Brown, J., Everett, K. R., Kanevskiy, M., Kofinas, G. P., Romanovsky, V. E., Shur, Y., and Webber, P. J.: Cumulative geoeological effects of 62 years of infrastructure and climate change in ice-rich permafrost landscapes, Prudhoe Bay Oilfield, Alaska, *Global Change Biology*, 20, 1211-1224, 10.1111/gcb.12500, 2014.
- 5 Sannel, A. B. K., and Brown, I. A.: High-resolution remote sensing identification of thermokarst lake dynamics in a subarctic peat plateau complex, *Canadian Journal of Remote Sensing*, 36, S26-S40, 10.5589/m10-010, 2010.
- Sannel, A. B. K., and Kuhry, P.: Warming-induced destabilization of peat plateau/thermokarst lake complexes, *Journal of Geophysical Research*, 116, 10.1029/2010JG001635, 2011.
- Schuur, E. A. G., Bockheim, J. G., Canadell, J. G., Euskirchen, E. S., Field, C. B., Goryachkin, S. V., Hagemann, S., Kuhry, P., Lafleur, P. M., Lee, H., Mazhitova, G., Nelson, F. E., Rinke, A., Romanovsky, V. E., Shiklomanov, N., Tarnocai, C., Venevsky, S., Vogel, J. G., and Zimov, S. A.: Vulnerability of Permafrost Carbon to Climate Change: Implications for the Global Carbon Cycle, *Bioscience*, 58, 701-714, 10.1641/B580807, 2008.
- 10 Sjöberg, Y., Hugelius, G., and Kuhry, P.: Thermokarst lake morphometry and erosion features in two peat plateau areas of northeast European Russia, *Permafr. Periglac. Proc.*, 24, 75-81, 2013.
- 15 Smith, L. C., Sheng, Y., and MacDonald, G. M.: A First Pan-Arctic Assessment of the Influence of Glaciation, Permafrost, Topography and Peatlands on Northern Hemisphere Lake Distribution, *Permafr. Periglac. Proc.*, 18, 201-208, 10.1002/ppp.581, 2007.
- Veremeeva, A. A., and Glushkova, N. V.: Relief formation in the regions of the ice complex deposit occurrence: Remote sensing and gis studies in the kolyma lowland tundra, *Earth's Cryosphere*, XX, 15-25, 2016.
- 20 Verpoorter, C., Kutser, T., Seekell, D. A., and Tranvik, L. J.: A global inventory of lakes based on high-resolution satellite imagery, *Geophys. Res. Lett.*, 41, 6396-6402, 10.1002/2014GL060641, 2014.
- Walker, D. A., Webber, P. J., Walker, M. D., Lederer, N. D., Meehan, R. H., and Nordstrand, E. A.: Use of geobotanical maps and automated mapping techniques to examine cumulative impacts in the Prudhoe Bay Oilfield, Alaska, *Environ. Conserv.*, 13, 149-160, 1986.
- 25 Watts, J., Kimball, J., Jones, L., Schroeder, R., and McDonald, K.: Satellite Microwave remote sensing of contrasting surface water inundation changes within the Arctic-Boreal Region, *Remote Sens. Environ.*, 127, 223-236, 2012.
- Watts, J. D., Kimball, J. S., Bartsch, A., and McDonald, K. C.: Surface water inundation in the boreal-Arctic: potential impacts on regional methane emissions, *Environ. Res. Lett.*, 9, 075001, 2014.
- Widhalm, B., Hogström, E., Ressler, C., Trofaier, A., Heim, B., Biasi, C., and Bartsch, A.: PAGE21 WP5-Land surface hydrology from remotely sensed data at PAGE21 sites, Department of Geodesy and Geoinformation (GEO), Research Groups Photogrammetry and Remote Sensing, Vienna University of Technology, Vienna, Austria, 15, 2014a.
- 30 Wik, M., Varner, R. K., Anthony, K. W., MacIntyre, S., and Bastviken, D.: Climate-sensitive northern lakes and ponds are critical components of methane release, *Nat. Geosci.*, 9, 99-105, 10.1038/ngeo2578, 2016.

**PeRL: A Circum-Arctic Permafrost Region Pond and Lake Database**

Sina Muster<sup>1</sup>, Kurt Roth<sup>2</sup>, Moritz Langer<sup>3</sup>, Stephan Lange<sup>1</sup>, Fabio Cresto Aleina<sup>4</sup>, Annett Bartsch<sup>5</sup>, Anne Morgenstern<sup>1</sup>, Guido Grosse<sup>1</sup>, Benjamin Jones<sup>6</sup>, A. Britta K. Sannel<sup>7</sup>, Ylva Sjöberg<sup>7</sup>, Frank Günther<sup>1</sup>, Christian Andresen<sup>8</sup>, Alexandra Veremeeva<sup>9</sup>, Prajna R. Lindgren<sup>10</sup>, Frédéric Bouchard<sup>11,13</sup>, Mark J. Lara<sup>12</sup>, Daniel Fortier<sup>13</sup>, Simon Charbonneau<sup>13</sup>, Tarmo A. Virtanen<sup>14</sup>, Gustaf Hugelius<sup>7</sup>, Juri Palmtag<sup>7</sup>, Matthias B. Siewert<sup>7</sup>, William J. Riley<sup>15</sup>, Charles D. Koven<sup>15</sup>, and Julia Boike<sup>1</sup>

<sup>1</sup> Alfred Wegener Institute Helmholtz Centre for Polar and Marine Research, Telegrafenberg A43, 14473 Potsdam, Germany

<sup>2</sup> Institute for Environmental Physics, Heidelberg University, Germany

<sup>3</sup> Humboldt University, Berlin, Germany

<sup>4</sup> Max Planck Institute for Meteorology, Hamburg, Germany

<sup>5</sup> Zentralanstalt für Meteorologie und Geodynamik, Vienna, Austria

<sup>6</sup> U.S. Geological Survey - Alaska Science Center, Anchorage, AK 99508, USA

<sup>7</sup> Stockholm University, Department of Physical Geography and the Bolin Centre for Climate Research, 10691 Stockholm, Sweden

<sup>8</sup> Los Alamos National Laboratory, Los Alamos, NM, USA

<sup>9</sup> Institute of Physicochemical and Biological Problems in Soil Science, Russian Academy of Sciences, Pushchino, Russia

<sup>10</sup> Geophysical Institute, University of Alaska Fairbanks, Fairbanks, AK, USA

<sup>11</sup> Institut national de la recherche scientifique (INRS), Centre Eau Terre Environnement (ETE), Québec QC, G1K 9A9, Canada

<sup>12</sup> Department of Plant Biology, University of Illinois at Urbana-Champaign, Urbana, IL 61801, USA

<sup>13</sup> Geography Department, University of Montréal, Montréal QC, H3C 3J7, Canada

<sup>14</sup> Department of Environmental Sciences, University of Helsinki, Finland

<sup>15</sup> Climate and Ecosystem Sciences Division, Lawrence Berkeley National Laboratory, Berkeley, USA

Correspondence to: Sina Muster (sina.muster@awi.de)

**Contents of this file**

Text S1 to S5

Tables S1 to S7

## Introduction

This supporting information document includes additional information on image processing and classification as well as the processing of regional permafrost maps.

Processing of TerraSAR-X imagery is described in Text S1. Detailed metadata of base imagery, image preprocessing, classification method and post-processing are listed in Table S1.

Text S2 explains the subgrid sampling of larger study areas for the representative calculation of waterbody statistics. Texts S3, S4, S5, and S6 describe original production and properties of permafrost landscapes for Alaska, Canada, and Russia and their harmonization for use in this study. Attributes of the vector files of each permafrost landscape region are listed and explained in tables S2, S3, and S4. Vector files of the regional permafrost landscapes were joined to a harmonized circum-arctic vector file. Table S5 lists the attributes of the circum-arctic vector file.

Table S7 lists metadata and references used for the characterization of climate and permafrost depth for each study area.

### Text S1. Processing of TerraSAR-X imagery

Geocoded EEC products obtained from DLR are delivered in radar brightness. They are projected to the best available DEM, i.e., SRTM X band DEMs (30 m resolution) and SRTM C band DEMs (90 m resolution). For the remaining areas, the 1 km resolution GLOBE DEM is used. The EEC is a detected multi-look product with reduced speckle and approximately square cells on ground. The slant-range resolution of the image is 1.2 m, which corresponds to 3.3–3.5 m projected on the ground for incidence angles between 45° and 20° and an azimuth resolution of 3.3 m (Eineder et al., 2008). SSC were geocoded to the DUE Permafrost DEM and no multi-looking was applied.

### Text S2. Subgrid sampling

In large study areas we performed a subgrid analysis, i.e. we selected waterbodies within equally sized boxes and averaged statistics from all boxes of the study area. In order to determine a representative box size we compared the variability of waterbody distribution statistics within three study areas in Russia, Canada, and Alaska. In each study area, we selected waterbodies from a minimum of 5 and up to 50 randomly distributed boxes with varying sizes of 5x5 km, 10x10 km, and 20x20 km. We calculated the standard error (SE) of the mean of all statistics across all boxes of the same size. SE of density (waterbody number per km<sup>2</sup>) and waterbody mean surface area was lowest for 10x10 km boxes. SE increased for 20x20 km boxes which is probably due to the significantly lower number of boxes that could be sampled. Only 12 PeRL sites have a study area larger than 1000 km<sup>2</sup> that would allow to sample a minimum of 5 boxes of 20x20 km in size. A box size of 10x10 km allows the subsampling of 26 sites with a minimum of 5 boxes. Taking into account the overall variability of distributions and the possible number of subgrid samples, a box size of 10x10 km was chosen for subgrid

analysis. Subgrid analysis was conducted for study areas larger than 300 km<sup>2</sup>.

### **Text S3. Alaskan permafrost landscape maps**

The ~~PL-permafrost landscape~~ map of Alaska reports surficial geology, MAAT, primary soil texture, permafrost extent, ground ice volume, and primary thermokarst landforms (Jorgenson et al., 2008b). A rule-based model was used to incorporate MAAT and surficial geology. Permafrost characteristics were assigned to each surficial deposit under varying temperatures using terrain-permafrost relationships and expert knowledge (Jorgenson et al., 2008b).

### **Text S4. Canadian permafrost landscape maps**

Permafrost landscapes of Canada are described in the National Ecological Framework (NEF). The NEF distinguishes four levels of generalization nested within each other. Ecozones represent the largest and most generalized units followed by ecoprovinces, ecoregions, and ecodistricts. Ecodistricts were delineated based mainly on differences in parent material, topography, landform and soil development derived from the (Soil Landscapes of Canada Working Group, 2010) at a map scale of 1:3,000,000 to 1:1,000,000 (Ecological Stratification Working Group, 1995; Marshall et al., 1999) whereas ecoregions and ecoprovinces are generalized based mainly on climate, physiography, and vegetation. Ecodistricts were therefore chosen as most appropriate to delineate permafrost landscapes. NEF reports the areal fraction of the underlying soil landscape units and attributes nested within each ecodistrict. The dominant fraction of surficial geology, lithology, permafrost extent and ground ice volume was chosen to describe each ecodistrict. Ecodistricts with the same permafrost landscape type within the same ecozone were then merged to PL units.

### **Text S5. Russian permafrost landscape characterization**

In Russia, information about permafrost extent, ground ice content, generalized geology and lithology was available only as ~~individual-separate~~ vector maps (Stolbovoi and McCallum, 2002). The individual maps were combined in ArcGIS 10.4 to delineate Russian ~~PL-permafrost landscape~~ units similar to the Canadian and Alaskan databases. Russian ecozones were mapped using the global-scale map by Olson et al. (2001) which conforms to the Alaskan and Canadian ecozones. The geometric union of ecozone, ground ice content, and permafrost extent was calculated in ArcGIS 10.1 via the tool “intersect”. Each unique combination of these three variables was assigned the dominant fraction of geology and lithology type.

**Table S1: Metadata about image processing and classification.** PREP: pre-processing steps; bands used for classification with their corresponding spectral range; POP: post-processing steps (ME-manual editing includes removal of rivers, streams, partial lakes, shadows, streets and gap-filling).

| Map ID                                         | Imagery                                            | Software                      | PREP                                                                                                                                                                | Band(s)               | Spectral range                                                                        | Method                              | POP | Reference                         |
|------------------------------------------------|----------------------------------------------------|-------------------------------|---------------------------------------------------------------------------------------------------------------------------------------------------------------------|-----------------------|---------------------------------------------------------------------------------------|-------------------------------------|-----|-----------------------------------|
| abi0012010xxxx                                 | Orthophoto (Lantmäteriet, I2014/00691); SPOT5; DEM | GDAL, SAGA GIS, Orfeo toolbox | 1. Image segmentation using Orthophoto RGB (1m) and DEM (2m), minimum object size 130m2;<br>2. Classification of watermask: SVM classifier using Red band and slope | red (1m) + slope (2m) | 610-680 nm                                                                            | segmentation -> SVM                 | ME  | this paper                        |
| arg00120110829                                 | KOMPSAT-2                                          | ENVI 4.8, ArcGIS 12           | georeferencing                                                                                                                                                      | NIR                   | 760-900 nm                                                                            | density slice                       | ME  | this paper                        |
| arg0022009xxxx, fir0022009xxxx, ice0032009xxxx | RapidEye                                           | N/A                           | georeferencing, histogram matching routine for radiometric normalization, mosaiking                                                                                 | B, G, R, RE, NIR      | blue: 440-510 nm, green: 520-590 nm, red: 630-685 nm, RE: 690-730 nm, NIR: 760-850 nm | object-oriented classification      | N/A | Bartsch and Seifert (2012)        |
| arg00320110711                                 | KOMPSAT-2                                          | ENVI 4.8, ArcGIS 10           | georeferencing                                                                                                                                                      | NIR                   | 760-900 nm                                                                            | density slice                       | ME  | Andresen and Loughheed (2015)     |
| bar00119480804                                 | aerial imagery                                     | ENVI 4.4                      | coregistration and orthorectification using an image-to-image correction (RMSE of 1.0 m)                                                                            | PAN                   | N/A                                                                                   | object-oriented classification      | ME  | Andresen and Loughheed (2015)     |
| bar00120020802                                 | Quickbird                                          | ENVI 4.4                      | coregistration and orthorectification using an image-to-image correction (RMSE of 1.0 m)                                                                            | PAN                   | 445-900 nm                                                                            | object-oriented classification      | ME  | Andresen and Loughheed (2015)     |
| bar00120080730                                 | Quickbird                                          | ENVI 4.4                      | coregistration and orthorectification using an image-to-image correction (RMSE of 1.0 m)                                                                            | PAN                   | 445-900 nm                                                                            | object-oriented classification      | ME  | Andresen and Loughheed (2015)     |
| bar00120100810                                 | WorldView-2                                        | ENVI 4.4                      | coregistration and orthorectification using an image-to-image correction (RMSE of 1.0 m)                                                                            | PAN                   | 450-800 nm                                                                            | object-oriented classification      | ME  | this paper                        |
| byk00120060709                                 | SPOT-5                                             | ArcGIS                        | georeferenced to topographic maps of scale 1:100,000                                                                                                                | PAN                   | 480-710 nm                                                                            | density slice                       | ME  | Lara et al. (2015)                |
| byl00120100902                                 | GeoEye-1                                           | Geomatica 2015, ArcGIS 10.2   | pan-sharpening, orthorectification                                                                                                                                  | B, G, R, NIR          | 450-510 nm, 510-580 nm, 655-690 nm, 780-920 nm                                        | unsupervised k-means classification | ME  | Muster et al. (2013)              |
| che00120020709                                 | IKONOS-2                                           | ArcGIS                        | orthorectification                                                                                                                                                  | PAN                   | 760-850 nm                                                                            | density slice                       | ME  | Grosse et al. (2008)              |
| che00220090724                                 | ALOS PRISM                                         | N/A                           | N/A                                                                                                                                                                 | PAN                   | 520-770 nm                                                                            | density slice                       | ME  | this paper                        |
| elc00120090825, wlc00120090825                 | TerraSAR-X                                         | ENVI 4.4                      | gamma filter (11x11 pixel)                                                                                                                                          | X                     | wavelength 31 mm, frequency 9.6 GHz                                                   | unsupervised k-means classification | ME  | Grosse et al. (2008)              |
| elc00220020801, wlc00220020801                 | Quickbird                                          | ArcGIS 10.2, eCognition 9.1   | principle component analysis on raster bands, pan-sharpening                                                                                                        | R, B, G, IR           | 450-520 nm, 560-600 nm, 630-690 nm, 760-890 nm                                        | object-oriented classification      | ME  | Widhalm et al. (2014a);Widhalm et |

| Map ID                                               | Imagery                                                   | Software                           | PREP                                                                                                                | Band(s)            | Spectral range                                                                                            | Method                                  | POP | Reference                                             |
|------------------------------------------------------|-----------------------------------------------------------|------------------------------------|---------------------------------------------------------------------------------------------------------------------|--------------------|-----------------------------------------------------------------------------------------------------------|-----------------------------------------|-----|-------------------------------------------------------|
|                                                      |                                                           |                                    |                                                                                                                     |                    |                                                                                                           |                                         |     | al. (2014b)                                           |
| elc00320090802,<br>wlc00320090802                    | KOMPSAT-2                                                 | ENVI 4.8,<br>ArcGIS 10             | georeferencing                                                                                                      | NIR                | 760-900 nm                                                                                                | density slice                           | ME  | Lara et al. 2015                                      |
| elc004200808xx                                       | Quickbird                                                 | ArcGIS 10.2,<br>eCognition 9.2     | principle component analysis on<br>raster bands,<br>pan-sharpening                                                  | R,B,G,IR           | 450-520 nm, 560-<br>600 nm,<br>630-690 nm, 760-<br>890 nm<br>wavelength 31<br>mm,<br>frequency 9.6<br>GHz | object-oriented<br>classification       | N/A | this paper                                            |
| esk00120090727                                       | TerraSAR-X                                                | ENVI 4.8,<br>ArcGIS 10             | lee filter (3x3 pixel), gamma filter<br>(11x11 pixel)                                                               | X                  |                                                                                                           | unsupervised k-<br>means classification | ME  | this paper                                            |
| fir00120090906                                       | KOMPSAT-2                                                 | ENVI 4.8,<br>ArcGIS 10             | georeferencing                                                                                                      | NIR                | 760-900 nm                                                                                                | density slice                           | ME  | this paper                                            |
| fis00120020715                                       | Airborne<br>Orthorectified<br>Radar<br>Imagery<br>(IFSAR) | ENVI 4.5                           | N/A                                                                                                                 | PAN                | bandwidth of 135<br>or 270 MHz                                                                            | density slice                           | ME  | Jones et al. (2013)                                   |
| grp00119590707                                       | aerial imagery                                            | ArcGIS 10.0                        | Scanning (1814 dpi);<br>georeferencing (RMSE = 1.8m<br>(4.2pix))                                                    | black and<br>white | N/A                                                                                                       | manual                                  | N/A | Bouchard et al.<br>(2014)                             |
| grp00120060707                                       | QuickBird                                                 | ArcGIS 10.0                        | geometric correction (cubic<br>convolution resampling)                                                              | PAN                | 450-900 nm                                                                                                | manual                                  | N/A | Bouchard et al.<br>(2014)                             |
| hbl00119540701                                       | aerial imagery                                            | ENVI 4.5, ENVI<br>4.7,<br>ArcGIS 9 | resampling of pixel resolution to<br>0.6 m, georeferenced to QuickBird<br>image from 2006 with RMSE of<br>0.38–1.42 | PAN                | N/A                                                                                                       | manual delineation                      | N/A | Sannel and Brown<br>(2010);Sannel and<br>Kuhry (2011) |
| hbl00119740617                                       | aerial imagery                                            | ENVI 4.5, ENVI<br>4.7,<br>ArcGIS 9 | resampling of pixel resolution to<br>0.6 m, georeferenced to QuickBird<br>image from 2006 RMSE of 0.38–<br>1.42     | PAN                | N/A                                                                                                       | manual delineation                      | N/A | Sannel and Brown<br>(2010);Sannel and<br>Kuhry (2011) |
| hbl00120060706                                       | QuickBird                                                 | ENVI 4.5, ENVI<br>4.7,<br>ArcGIS 9 | N/A                                                                                                                 | PAN                | 405-1053 nm                                                                                               | manual delineation                      | N/A | Sannel and Brown<br>(2010);Sannel and<br>Kuhry (2011) |
| imc00120040725                                       | QuickBird-2                                               | ENVI 5.0,<br>ArcGIS 10.3           | orthorectification                                                                                                  | PAN                | 760-850 nm                                                                                                | density slice                           | ME  | this paper                                            |
| ind00120090907                                       | WorldView-1                                               | ENVI 5.0,<br>ArcGIS 10.3           | orthorectification                                                                                                  | PAN                | 400-900 nm                                                                                                | density slice,<br>opening filter 3x3    | ME  | this paper                                            |
| kol00119650721,<br>kol00219650721                    | CORONA                                                    | ArcGIS 9                           | georeferencing                                                                                                      | PAN                | N/A                                                                                                       | manual delineation                      | N/A | this paper                                            |
| kpc001201007xx,<br>kpc002201007xx,<br>kpc003201007xx | digital true<br>color aerial<br>imagery                   | N/A                                | N/A                                                                                                                 | R, G, B            | N/A                                                                                                       | manual delineation                      | N/A | Walker et al.<br>(1986);Raynolds et<br>al. (2014)     |
| ksl00119620628                                       | Corona KH4                                                | ENVI 4.8,<br>ArcGIS 10             | georeferencing to Landsat ETM &<br>TM (RMSE=10 m)                                                                   | PAN                | N/A                                                                                                       | density slice                           | ME  | this paper                                            |
| ksl0012012xxxx                                       | SPOT-5                                                    | eCognition 8                       | Principal Component Analysis on<br>visible and IR bands                                                             | G, R, NIR          | N/A                                                                                                       | object-oriented<br>classification       | ME  | this paper                                            |
| kur00120100805                                       | Geoeye                                                    | ENVI 4.8,<br>ArcGIS 10             | pan-sharpening, orthorectification<br>(RMSE: 0.36m)                                                                 | NIR                | 760-900 nm                                                                                                | unsupervised k-<br>means classification | ME  | this paper                                            |
| kur00220080926                                       | ALOS PRISM                                                | PCI Geomatica,                     | orthorectification based on own                                                                                     | PAN                | 520-770 nm                                                                                                | manual delineation                      | ME  | this paper                                            |

| Map ID          | Imagery        | Software                                                                  | PREP                                                                                                                                                                                           | Band(s)      | Spectral range                                                        | Method                                                                                     | POP                                                                         | Reference                                      |
|-----------------|----------------|---------------------------------------------------------------------------|------------------------------------------------------------------------------------------------------------------------------------------------------------------------------------------------|--------------|-----------------------------------------------------------------------|--------------------------------------------------------------------------------------------|-----------------------------------------------------------------------------|------------------------------------------------|
|                 |                | ArcGIS 9                                                                  | stereo DEM                                                                                                                                                                                     |              |                                                                       |                                                                                            |                                                                             |                                                |
| kyt00120070728  | ALOS PRISM     | ENVI 4.8, ArcGIS 10                                                       | N/A                                                                                                                                                                                            | PAN          | 520-770 nm                                                            | density slice                                                                              | ME                                                                          | Widhalm et al. (2014a); Widhalm et al. (2014b) |
| log00120110811  | QuickBird      | ENVI 5.1                                                                  | N/A                                                                                                                                                                                            | NIR, R, G, B | 485-830 nm                                                            | supervised maximum-likelihood classification                                               | ME                                                                          | Palmtag et al. (2016)                          |
| mdn00120090921  | TerraSAR-X     | ENVI 4.8, ArcGIS 10                                                       | lee filter (3x3 pixel), gamma filter (11x11 pixel)                                                                                                                                             | X            | wavelength 31 mm, frequency 9.6 GHz                                   | density slice, DN: -28.06 to -14.79                                                        | ME                                                                          | this paper                                     |
| mdn00120100716  | TerraSAR-X     | ENVI 4.8, ArcGIS 10                                                       | lee filter (3x3 pixel), gamma filter (11x11 pixel)                                                                                                                                             | X            | wavelength 31 mm, frequency 9.6 GHz                                   | k-means classification: 15 classes, 5 iterations, class 1,2,3 as water identified          | ME                                                                          | this paper                                     |
| ole00120060708  | SPOT-5         | ArcGIS                                                                    | georeferenced to topographic maps of scale 1:100,000                                                                                                                                           | PAN          | 480-710 nm                                                            | density slice                                                                              | ME                                                                          | Grosse et al. (2008)                           |
| pbp00120090813  | TerraSAR-X     | ENVI 4.8, ArcGIS 10                                                       | gamma filter (11x11 pixel)                                                                                                                                                                     | X            | wavelength 31 mm, frequency 9.6 GHz                                   | density slice (brightness values smaller $-21.55 \sigma$ db were classified as open water) | majority filter (7x7 pixel) to reduce spurious pixels in classification, ME | (Muster et al., 2013)                          |
| ric001201209125 | TerraSAR-X     | ENVI 4.8, ArcGIS 10                                                       | lee filter (3x3 pixel), gamma filter (11x11 pixel)                                                                                                                                             | X            | wavelength 31 mm, frequency 9.6 GHz                                   | k-means classification: 15 classes, 5 iterations; classes 2,3,4 were identified as water   | ME                                                                          | this paper                                     |
| rog00120070626  | QuickBird      | ArcGIS                                                                    | N/A                                                                                                                                                                                            | PAN          | 450-900 nm                                                            | manual delineation                                                                         | N/A                                                                         | Sjöberg et al. (2013)                          |
| rog00219740726  | aerial imagery | ENVI 4.5, ENVI 4.7, ArcGIS 9                                              | resampling of pixel resolution to 0.6 m, georeferenced to QuickBird image from 2007 with RMSE of 0.20-1.25, aerial photographs, georeferenced to QuickBird image from 2007 (RMSE of 0.17-1.07) | PAN          | 405-1053 nm                                                           | manual delineation                                                                         | N/A                                                                         | Sannel and Kuhry (2011)                        |
| rog00220070707  | QuickBird      | ENVI 4.5, ENVI 4.7, ArcGIS 9                                              | N/A                                                                                                                                                                                            | PAN          | 405-1053 nm                                                           | manual delineation                                                                         | N/A                                                                         | Sannel and Kuhry (2011)                        |
| rog00320070626  | QuickBird-2    | Classification in Definiens Professional 5.0, post processing with ArcGIS | re-georeferenced using field measured GPS-points                                                                                                                                               | B, G, R, NIR | blue: 450-520 nm, green: 520-600 nm, red: 630-690 nm, NIR: 760-890 nm | supervised, see more in INFO_Qbird_classification_version4.pdf                             | ME                                                                          | this paper                                     |
| rog00420070704  | QuickBird-2    | Classification in Definiens Professional 5.0, post                        | re-georeferenced using field measured GPS-points                                                                                                                                               | B, G, R, NIR | blue: 450-520 nm, green: 520-600 nm, red: 630-690 nm,                 | supervised, see more in INFO_Qbird_classification_                                         | ME                                                                          | this paper                                     |



| Map ID                         | Imagery        | Software                                                                                 | PREP                                                                                                    | Band(s)          | Spectral range                                                                        | Method                                                                             | POP | Reference                  |
|--------------------------------|----------------|------------------------------------------------------------------------------------------|---------------------------------------------------------------------------------------------------------|------------------|---------------------------------------------------------------------------------------|------------------------------------------------------------------------------------|-----|----------------------------|
| rog00520070704                 | QuickBird-2    | processing with ArcGIS Professional 5.0, post processing with ArcGIS ENVI 4.8, ArcGIS 10 | re-georeferenced using field measured GPS-points                                                        | B, G, R, NIR     | NIR: 760-890 nm<br><br>450-520 nm, 520-600 nm, 630-690 nm, 760-890 nm                 | version4.pdf<br><br>supervised, see more in INFO_Qbird_classification_version4.pdf | ME  | this paper                 |
| sam001200808xx                 | aerial imagery | ArcGIS                                                                                   | georeferencing                                                                                          | NIR              | N/A                                                                                   | N/A                                                                                | ME  | Muster et al. (2012)       |
| sei00120070706                 | QuickBird      | ArcGIS                                                                                   | N/A                                                                                                     | PAN              | 450-900 nm                                                                            | manual delineation                                                                 | N/A | Sjöberg et al. (2013)      |
| sei00220070706                 | QuickBird-2    | Classification in Definiens Professional 5.0, post processing with ArcGIS                | re-georeferenced using field measured GPS-points                                                        | B, G, R, NIR     | blue: 450-520 nm, green: 520-600 nm, red: 630-690 nm, NIR: 760-890 nm                 | supervised, see more in INFO_Qbird_classification_version4.pdf                     | ME  | this paper                 |
| sur00120130802                 | TerraSAR-X     | ENVI 4.8, ArcGIS 10                                                                      | orthorectification, gamma filter 10x10m                                                                 | X                | wavelength 31 mm, frequency 9.6 GHz                                                   | threshold classification                                                           | ME  | this paper                 |
| tav00119630831                 | aerial imagery | ENVI 4.5, ENVI 4.7, ArcGIS 9                                                             | resampling of pixel resolution to 0.6 m, georeferenced to IKONOS image from 2003                        | PAN              | N/A                                                                                   | manual delineation                                                                 | N/A | Sannel and Kuhry (2011)    |
| tav00119750810                 | aerial imagery | ENVI 4.5, ENVI 4.7, ArcGIS 9                                                             | resampling of pixel resolution to 0.6 m, georeferenced to IKONOS image from 2003 with RMSE of 0.60-2.38 | PAN              | N/A                                                                                   | manual delineation                                                                 | N/A | Sannel and Kuhry (2011)    |
| tav00120030702                 | IKONOS         | ENVI 4.5, ENVI 4.7, ArcGIS 9                                                             | resampling of pixel resolution to 0.6 m                                                                 | PAN              | 760-850 nm                                                                            | manual delineation                                                                 | N/A | Sannel and Kuhry (2011)    |
| tbr00120100901, tea00220100901 | TerraSAR-X     | ENVI 4.8, ArcGIS 10                                                                      | lee filter (3x3 pixel), gamma filter (11x11 pixel)                                                      | X                | wavelength 31 mm, frequency 9.6 GHz                                                   | k-means classification: 15 classes, 5 iterations                                   | ME  | this paper                 |
| tuk00120120723                 | TerraSAR-X     | ENVI 4.8, ArcGIS 10                                                                      | lee filter (3x3 pixel), gamma filter (7x7 pixel)                                                        | X                | wavelength 31 mm, frequency 9.6 GHz                                                   | k-means classification: 15 classes, 5 iterations                                   | ME  | this paper                 |
| yak0012009xxxx                 | RapidEye       |                                                                                          | georeferencing, histogram matching routine for radiometric normalization, mosaicking                    | B, G, R, RE, NIR | blue: 440-510 nm, green: 520-590 nm, red: 630-685 nm, RE: 690-730 nm, NIR: 760-850 nm | object-oriented classification                                                     | ME  | Bartsch and Seifert (2012) |
| yam00120080824                 | TerraSAR-X     | ENVI 4.8, ArcGIS 10                                                                      | lee filter (3x3 pixel), gamma filter (7x7 pixel)                                                        | X                | wavelength 31 mm, frequency 9.6 GHz                                                   | density slice, DN: -2.7 to -1.9                                                    | ME  | this paper                 |
| yam00220100820                 | TerraSAR-X     | ENVI 4.8, ArcGIS 10                                                                      | lee filter (3x3 pixel), gamma filter (11x11 pixel)                                                      | X                | wavelength 31 mm,                                                                     | density slice, DN: 0 to 40                                                         | ME  | this paper                 |

| Map ID                            | Imagery        | Software                     | PREP                                                  | Band(s)         | Spectral range                                                                    | Method                                                 | POP | Reference  |
|-----------------------------------|----------------|------------------------------|-------------------------------------------------------|-----------------|-----------------------------------------------------------------------------------|--------------------------------------------------------|-----|------------|
| yfl0012011xxxx                    | aerial imagery | eCognition 8,<br>ArcGIS 10.2 | orthorectification                                    | NIR, R, G,<br>B | frequency 9.6<br>GHz<br>450-520 nm, 560-<br>600 nm,<br>630-690 nm, 760-<br>890 nm | object-oriented<br>classification                      | ME  | this paper |
| yuk00120090812,<br>yuk00220090812 | TerraSAR-X     | ENVI 4.8,<br>ArcGIS 10       | lee filter (3x3 pixel), gamma filter<br>(11x11 pixel) | X               | wavelength 31<br>mm,<br>frequency 9.6<br>GHz                                      | k-means<br>classification: 15<br>classes, 5 iterations | ME  | this paper |

**Table S2. Attributes contained in the polygon attribute table of Alaskan permafrost landscapes (*alaska\_perma\_land.shp*)**

| Field name | Description                                                                                                                                                                                                            | Source |
|------------|------------------------------------------------------------------------------------------------------------------------------------------------------------------------------------------------------------------------|--------|
| ECOZONE    | ecozone                                                                                                                                                                                                                | AK2008 |
| GEN_GEOL   | generalized geology                                                                                                                                                                                                    | AK2008 |
| LITHOLOGY  | texture                                                                                                                                                                                                                | AK2008 |
| GROUND_ICE | ground ice content [vol %]                                                                                                                                                                                             | AK2008 |
| PF_EXTENT  | permafrost extent                                                                                                                                                                                                      | AK2008 |
| PERMA_LAND | combined label of PF_EXTENT /<br>GROUND_ICE/GEN_GEOL/LITHOLOGY                                                                                                                                                         | PeRL   |
| ECOZID     | ecozone ID                                                                                                                                                                                                             | PeRL   |
| PERMID     | ID for each polygon in the vector file. The first digit stands<br>for the region (1 – Alaska, 2 – Canada, 3 – Russia), digits 2<br>– 6 identify the single polygon, and the last three digits<br>identify the ecozone. | PeRL   |
| AREA       | area of polygon in square meters                                                                                                                                                                                       | PeRL   |
| PERIMETER  | perimeter of polygon in square meters                                                                                                                                                                                  | PeRL   |

**Table S3. Description of attributes contained in the polygon attribute table of Canadian permafrost landscapes (*canada\_perma\_land.shp*).**

| <b>Field name</b> | <b>Description</b>                                                                                                                                                                                                  | <b>Source</b> |
|-------------------|---------------------------------------------------------------------------------------------------------------------------------------------------------------------------------------------------------------------|---------------|
| ECOZONE           | ecozone                                                                                                                                                                                                             | NEF           |
| ECOREGION         | ecoregion                                                                                                                                                                                                           | NEF           |
| ECODISTRIC        | ecodistrict                                                                                                                                                                                                         | NEF           |
| GEN_GEOL          | dominant fraction of generalized (surficial) geology                                                                                                                                                                | NEF           |
| LITHOLOGY         | dominant fraction of texture                                                                                                                                                                                        | NEF           |
| GROUND_ICE        | dominant fraction of ground ice content in vol%                                                                                                                                                                     | NEF           |
| PF_EXTENT         | dominant fraction of permafrost extent                                                                                                                                                                              | NEF           |
| PERMA_LAND        | combined label of PF_EXTENT /<br>GROUND_ICE/GEN_GEOL/LITHOLOGY                                                                                                                                                      | PeRL          |
| ECOZID            | ecozone ID                                                                                                                                                                                                          | PeRL          |
| PERMID            | ID for each polygon in the vector file. The first digit stands for the region<br>(1 – Alaska, 2 – Canada, 3 – Russia), digits 2 – 6 identify the single<br>polygon, and the last three digits identify the ecozone. | PeRL          |
| AREA              | area of polygon in square meters                                                                                                                                                                                    | PeRL          |
| PERIMETER         | perimeter of polygon in square meters                                                                                                                                                                               | PeRL          |

**Table S4. Description of attributes contained in the polygon attribute table of Russian permafrost landscapes (*russia\_perma\_land.shp*).**

| Field name | Description                                                                                                                                                                                                   | Source                                                                                                                                     |
|------------|---------------------------------------------------------------------------------------------------------------------------------------------------------------------------------------------------------------|--------------------------------------------------------------------------------------------------------------------------------------------|
| ECOZONE    | Metadata: <a href="http://maps.tnc.org/files/metadata/TNC_Lands.xml">http://maps.tnc.org/files/metadata/TNC_Lands.xml</a>                                                                                     | Olson et al., 2001<br>Downloaded at<br><a href="http://maps.tnc.org/gis_data.html#TerrEcos">http://maps.tnc.org/gis_data.html#TerrEcos</a> |
| GEN_GEOL   | Surficial geology                                                                                                                                                                                             | LRR, Stolbovoi and McCallum (2002)                                                                                                         |
| LITHOLOGY  | Texture                                                                                                                                                                                                       | LRR, Stolbovoi and McCallum (2002)                                                                                                         |
| GROUND_ICE | ground ice content in vol%                                                                                                                                                                                    | LRR                                                                                                                                        |
| PF_EXTENT  | permafrost extent                                                                                                                                                                                             | LRR                                                                                                                                        |
| PERMA_LAND | combined label of PF_EXTENT /<br>GROUND_ICE/GEN_GEOL/LITHOLOGY                                                                                                                                                | LRR                                                                                                                                        |
| ECOZID     | ecozone ID                                                                                                                                                                                                    | PeRL                                                                                                                                       |
| PERMID     | ID for each polygon in the vector file. The first digit stands for the region (1 – Alaska, 2 – Canada, 3 – Russia), digits 2 – 6 identify the single polygon, and the last three digits identify the ecozone. | PeRL                                                                                                                                       |
| AREA       | area of polygon in square meters                                                                                                                                                                              | PeRL                                                                                                                                       |
| PERIMETER  | perimeter of polygon in square meters                                                                                                                                                                         | PeRL                                                                                                                                       |

**Table S5. Terminology for permafrost properties in the regional permafrost databases of Alaska (AK2008), Canada (NEF), and Russia (LRR).**

| <b>Description</b>   | <b>PeRL</b> | <b>AK2008</b> | <b>NEF</b> | <b>LRR</b> |
|----------------------|-------------|---------------|------------|------------|
| ecozone              | ECOZONE     | NA            | ecozone    | NA         |
| surficial geology    | GEN_GEOL    | AGGRDEPOS     | UNIT       | PARROCK    |
| lithology            | LITHOLOGY   | TEXTURE       | TEXTURE    | TEXTUR     |
| permafrost<br>extent | PF_EXTENT   | PF_EXTENT     | PERMAFROST | EXTENT_OF_ |
| ground ice           | GROUND_ICE  | ICECLOWASS    | PERMAFROST | MIN_MAX    |

**Table S6. Attributes contained in the polygon attribute table of circum-arctic permafrost landscapes (*PeRL\_study\_area.shp*)**

| <b>Field name</b> | <b>Description</b>                                                     |
|-------------------|------------------------------------------------------------------------|
| country           | country                                                                |
| Map_ID            | ID of individual waterbody map                                         |
| site              | site name                                                              |
| MAAT              | mean annual air temperature [°C]                                       |
| TP                | mean annual total precipitation [mm]                                   |
| PE_DEPTH          | Permafrost depth [m]                                                   |
| lat               | latitude coordinate of polygon centroid in decimal degrees<br>(WGS84)  |
| long              | longitude coordinate of polygon centroid in decimal degrees<br>(WGS84) |
| AREA              | area of polygon in square metres                                       |
| AREA_SQKM         | area of polygon in square kilometres                                   |

**Table S7. Metadata and references for climate data and permafrost depth.** MAAT – mean annual air temperature, TP – total precipitation.

| Map ID                                                                                                                 | Country | MAAT & TP period     | Climate data source, station                                                                            | Permafrost depth source                       |
|------------------------------------------------------------------------------------------------------------------------|---------|----------------------|---------------------------------------------------------------------------------------------------------|-----------------------------------------------|
| abi0012010xxxx                                                                                                         | Sweden  | 2006–2011, 1997–2007 | MAAT: Johansson et al. (2013), TP: Abisko, <a href="http://www.polar.se/abisko">www.polar.se/abisko</a> | Åkerman and Johansson (2008), Dobiński (2010) |
| arg00120110829, arg0022009xxxx                                                                                         | Russia  | 1999–2011            | Boike et al. (2013)                                                                                     | Yershov et al. (1991)                         |
| bar00119480804, bar00120020802<br>bar00120080730, bar00120100810,<br>wlc00120090825, wlc00220020801,<br>wlc00320090802 | Alaska  | 1981–2010            | National Climatic Data Center (2016): Barrow W Post Rogers Airport AK US                                | Brown et al. (1980)                           |
| byk00120060709                                                                                                         | Russia  | 1984–1994            | Rivas-Martínez et al. (2011)                                                                            | Grosse et al. (2008)                          |
| byl00120160728                                                                                                         | Canada  | N/A                  | MAAT: Godin et al. (2016), TP: Fortier et al. (2007)                                                    | Smith and Burgess (2002)                      |
| che00120020709, che00220090724                                                                                         | Russia  | 1984–1994            | Rivas-Martínez et al. (2011)                                                                            | Grosse et al. (2008)                          |
| elc00120090825, elc00220020801,<br>elc00320090802                                                                      | Alaska  | 1981–2010            | National Climatic Data Center (2016): Barrow W Post Rogers Airport, AK, US                              | Sellmann and Brown (1973)                     |
| esk00120090727                                                                                                         | Canada  | 1981–2010            | Environment Canada (2016): Tuktoyaktuk A                                                                | Taylor and Judge (1981)                       |
| fis00120020715                                                                                                         | Alaska  | 1981–2010            | National Climatic Data Center (2016): Kuparuk AK US                                                     | Jorgenson et al. (2008b)                      |
| fir00120090906, fir0022009xxxx,<br>arg00320110711                                                                      | Russia  | 1999–2011            | Boike et al. (2013)                                                                                     | Yershov et al. (1991)                         |
| grp00119590707, grp00120060707                                                                                         | Canada  | 1971–2000            | Bouchard et al. (2014), (Environment Canada, 2016)                                                      | Smith and Burgess (2002)                      |
| hbl00119540701, hbl00119740617,<br>hbl00120060706                                                                      | Canada  | 1971–2000            | Sannel and Kuhry (2011), Environment Canada (2016)                                                      | N/A                                           |
| ice0032009xxxx                                                                                                         | Russia  | 1999–2011            | Boike et al. (2013)                                                                                     | Yershov et al. (1991)                         |
| ind00120090907, kyt00120070728                                                                                         | Russia  | 1961–1990            | Chokurdakh WMO station 21946                                                                            | N/A                                           |
| kol00119650721                                                                                                         | Russia  | 1996–2015            | Bukhta Ambarchik meteostation (WMO ID 25034)                                                            | Yershov et al. (1991)                         |
| kol00219650721                                                                                                         | Russia  | 1996–2015            | Andrushkino meteostation (WMO ID 25017)                                                                 | Yershov et al. (1991)                         |
| kur00120100805, kur00220080926                                                                                         | Russia  | 1999–2011            | Boike et al. (2013)                                                                                     | Yershov et al. (1991)                         |
| log00120110811                                                                                                         | Russia  | 1961–1990            | Khatanga WMO station 20891                                                                              | N/A                                           |
| mdn00120100716                                                                                                         | Canada  | 1981–2010            | Environment Canada (2016): Inuvik A                                                                     | Burn and Kokelj (2009)                        |
| mdw00120090921                                                                                                         | Canada  | 1981–2010            | Environment Canada (2016): Inuvik A                                                                     | Burn and Kokelj (2009)                        |
| ole00120060708                                                                                                         | Russia  | 1948–1960            | Rivas-Martínez et al. (2011)                                                                            | Grosse et al. (2008)                          |
| pbp00120090813                                                                                                         | Canada  | 1981–2010            | Environment Canada (2016): Resolute Cars                                                                | Smith and Burgess (2002)                      |

| Map ID                                                                                               | Country | MAAT & TP period | Climate data source, station                                       | Permafrost depth source   |
|------------------------------------------------------------------------------------------------------|---------|------------------|--------------------------------------------------------------------|---------------------------|
| imc00120040725, kpc001201007xx,<br>kpc002201007xx,<br>kpc003201007xx                                 | Alaska  | 1981–2010        | National Climatic Data Center (2016): Kuparuk AK US                | N/A                       |
| ric001201209125                                                                                      | Canada  | 1981–2010        | Environment Canada (2016): Inuvik A                                | Burn (2002)               |
| rog00120070626, rog00219740726,<br>rog00220070707, rog00320070626,<br>rog00420070704, rog00520070704 | Russia  | 1961–1990        | Hugelius et al. (2011), Vorkuta                                    | Rivkin et al. (2008)      |
| sam001200808xx                                                                                       | Russia  | 1999–2011        | Boike et al. (2013)                                                | Yershov et al. (1991)     |
| sei00120070706, sei00220070706                                                                       | Russia  | N/A              | Sjöberg et al. (2013)                                              | Rivkin et al. (2008)      |
| ksl00119620628, ksl0012012xxxx                                                                       | Alaska  | 1981–2010        | National Climatic Data Center (2016): Noma Municipal Airport AK US | Jorgenson et al. (2008a)  |
| sur00120130802                                                                                       | Russia  | N/A              | Kremenetski et al. (2003)                                          | Kremenetski et al. (2003) |
| tbr00120100901,<br>tea00120100901                                                                    | Canada  | 1981–2010        | Environment Canada (2016), Yellowknife A                           | N/A                       |
| tav00119630831, tav00119750810,<br>tav00120030702                                                    | Sweden  | 1971–2000        | Sannel and Kuhry (2011)                                            | Sannel and Kuhry (2011)   |
| tuk00120120723                                                                                       | Canada  | 1981–2010        | Environment Canada (2016): Tuktoyaktuk A                           | Taylor and Judge (1981)   |
| yak0012009xxxx                                                                                       | Russia  | 1930–2010        | Fedorov et al. (2014)                                              | Yershov et al. (1991)     |
| yam00120080824, yam00220100820                                                                       | Russia  | 2004–2013        | Leibman et al. (2015), Marre-Sale                                  | Yershov et al. (1991)     |
| yfl0012011xxxx                                                                                       | Alaska  | 1981–2010        | National Climatic Data Center (2016): Central Number 2 AK US       | Walvoord et al. (2012)    |
| yuk00120090812,<br>yuk00220090812                                                                    | Alaska  | 1981–2010        | National Climatic Data Center (2016): Bethel Airport AK US         | N/A                       |



## References

- Åkerman, H. J., and Johansson, M.: Thawing permafrost and thicker active layers in sub-arctic Sweden, *Permafr. Periglac. Proc.*, 19, 279-292, 2008.
- 5 Andresen, C. G., and Lougheed, V. L.: Disappearing Arctic tundra ponds: Fine-scale analysis of surface hydrology in drained thaw lake basins over a 65 year period (1948–2013), *J Geophys Res-Biogeophys*, 120, 466–479, 2015.
- Bartsch, A., and Seifert, F. M.: The ESA DUE Permafrost project-A service for high latitude research, *Geoscience and Remote Sensing Symposium (IGARSS)*, 2012 IEEE International, 2012, 5222-5225,
- Boike, J., Kattenstroth, B., Abramova, K., Bornemann, N., Chetverova, A., Fedorova, I., Fröb, K., Grigoriev, M., Grüber, M., Kutzbach, L., Langer, M., Minke, M., Muster, S., Piel, K., Pfeiffer, E. M., Stoof, G., Westermann, S., Wischniewski, K., Wille, C., and Hubberten, H. W.: Baseline characteristics of climate, permafrost and land cover from a new permafrost observatory in the Lena River Delta, Siberia (1998-2011), *Biogeosciences*, 10, 2105-2128, 10.5194/bg-10-2105-2013, 2013.
- 10 Bouchard, F., Francus, P., Pienitz, R., Laurion, I., and Feyte, S.: Subarctic thermokarst ponds: Investigating recent landscape evolution and sediment dynamics in thawed permafrost of northern Québec (Canada), *Arct. Antarct. Alp. Res.*, 46, 251-271, 2014.
- 15 Brown, J., Miller, P. C., Tieszen, L. L., and Bunnell, F.: An arctic ecosystem: the coastal tundra at Barrow, Alaska, Dowden, Hutchinson & Ross, Inc., 1980.
- Burn, C.: Tundra lakes and permafrost, Richards Island, western Arctic coast, Canada, *Can. J. Earth Sci.*, 39, 1281-1298, 2002.
- 20 Burn, C., and Kokelj, S.: The environment and permafrost of the Mackenzie Delta area, *Permafr. Periglac. Proc.*, 20, 83-105, 2009.
- Dobiński, W.: Geophysical characteristics of permafrost in the Abisko area, northern Sweden, *Pol. Polar Res*, 31, 141-158, 2010.
- Eineder, M., Fritz, T., Mittermayer, J., Roth, A., Boerner, E., and Breit, H.: TerraSAR-X ground segment, basic product specification document, German Aerospace Agency, Oberpfaffenhofen, Germany, 103, 2008.
- 25 Fedorov, A. N., Ivanova, R. N., Park, H., Hiyama, T., and Iijima, Y.: Recent air temperature changes in the permafrost landscapes of northeastern Eurasia, *Polar Science*, 8, 114-128, 10.1016/j.polar.2014.02.001, 2014.
- Fortier, D., Allard, M., and Shur, Y.: Observation of rapid drainage system development by thermal erosion of ice wedges on Bylot Island, Canadian Arctic Archipelago, *Permafr. Periglac. Proc.*, 18, 229-243, 10.1002/ppp.595, 2007.
- 30 Godin, E., Fortier, D., and Lévesque, E.: Nonlinear thermal and moisture response of ice-wedge polygons to permafrost disturbance increases heterogeneity of high Arctic wetland, *Biogeosciences*, 13, 1439-1452, 2016.
- Grosse, G., Romanovsky, V., Walter, K., Morgenstern, A., Lantuit, H., and Zimov, S.: Distribution of Thermokarst Lakes and Ponds at Three Yedoma Sites in Siberia, Ninth International Conference on Permafrost, University of Alaska, Fairbanks, USA, 2008, 551-556,
- 35 Hugelius, G., Virtanen, T., Kaverin, D., Pastukhov, A., Rivkin, F., Marchenko, S., Romanovsky, V., and Kuhry, P.: High-resolution mapping of ecosystem carbon storage and potential effects of permafrost thaw in periglacial terrain, *European Russian Arctic, J Geophys Res-Biogeophys*, 116, 2011.
- Johansson, M., Callaghan, T. V., Bosio, J., Åkerman, H. J., Jackowicz-Korczynski, M., and Christensen, T. R.: Rapid responses of permafrost and vegetation to experimentally increased snow cover in sub-arctic Sweden, *Environ. Res. Lett.*, 8, 035025, 2013.
- 40 Jones, B. M., Gusmeroli, A., Arp, C. D., Strozzi, T., Grosse, G., Gaglioti, B. V., and Whitman, M. S.: Classification of freshwater ice conditions on the Alaskan Arctic Coastal Plain using ground penetrating radar and TerraSAR-X satellite data, *Int. J. Remote Sens.*, 34, 8267-8279, 2013.
- Jorgenson, M., Yoshikawa, K., Kanevskiy, M., Shur, Y., Romanovsky, V., Marchenko, S., Grosse, G., Brown, J., and Jones, B.: Permafrost characteristics of Alaska, *Proceedings of the Ninth International Conference on Permafrost*, 2008a, 121-122,
- 45 Kremenetski, K. V., Velichko, A. A., Borisova, O. K., MacDonald, G., Smith, L. C., Frey, K. E., and Orlova, L. A.: Peatlands of the Western Siberian lowlands: current knowledge on zonation, carbon content and Late Quaternary history, *Quaternary Science Reviews*, 22, 703-723, 2003.
- 50 Lara, M. J., McGuire, A. D., Euskirchen, E. S., Tweedie, C. E., Hinkel, K. M., Skurikhin, A. N., Romanovsky, V. E., Grosse, G., Bolton, W. R., and Genet, H.: Polygonal tundra geomorphological change in response to warming alters future CO<sub>2</sub> and CH<sub>4</sub> flux on the Barrow Peninsula, *Global change biology*, 21, 1634-1651, 2015.
- Leibman, M., Khomutov, A., Gubarkov, A., Mullanurov, D., and Dvornikov, Y.: The research station "Vaskiny Dachi", Central Yamal, West Siberia, Russia—a review of 25 years of permafrost studies, *Fennia*, 193, 3-30, 2015.
- 55 Marshall, I., Schut, P., and Ballard, M.: A national ecological framework for Canada: Attribute data, Agriculture and AgriFood Canada, Research Branch, Centre for Land and Biological Resources Research, and Environment Canada, State of the Environment Directorate, Ecozone Analysis Branch, Ottawa/Hull, Canada, 1999.

- Muster, S., Langer, M., Heim, B., Westermann, S., and Boike, J.: Subpixel heterogeneity of ice-wedge polygonal tundra: a multi-scale analysis of land cover and evapotranspiration in the Lena River Delta, Siberia, *Tellus B*, 64, 10.3402/tellusb.v64i0.17301, 2012.
- Muster, S., Heim, B., Abnizova, A., and Boike, J.: Water body distributions across scales: A remote sensing based comparison of three Arctic tundra wetlands, *Remote Sensing*, 5, 1498–1523, 10.3390/rs5041498, 2013.
- 5 Olson, D. M., Dinerstein, E., Wikramanayake, E. D., Burgess, N. D., Powell, G. V., Underwood, E. C., D'amico, J. A., Itoua, I., Strand, H. E., and Morrison, J. C.: Terrestrial Ecoregions of the World: A New Map of Life on Earth: A new global map of terrestrial ecoregions provides an innovative tool for conserving biodiversity, *Bioscience*, 51, 933–938, 2001.
- Palmtag, J., Ramage, J., Hugelius, G., Gentsch, N., Lashchinskiy, N., Richter, A., and Kuhry, P.: Controls on the storage of organic carbon in permafrost soil in northern Siberia, *European Journal of Soil Science*, 67, 478–491, 2016.
- 10 Reynolds, M. K., Walker, D. A., Ambrosius, K. J., Brown, J., Everett, K. R., Kanevskiy, M., Kofinas, G. P., Romanovsky, V. E., Shur, Y., and Webber, P. J.: Cumulative geocological effects of 62 years of infrastructure and climate change in ice-rich permafrost landscapes, Prudhoe Bay Oilfield, Alaska, *Global Change Biology*, 20, 1211–1224, 10.1111/gcb.12500, 2014.
- 15 Rivas-Martínez, S., Rivas-Sáenz, S., and Penas, A., S: Worldwide bioclimatic classification system, *Global Geobotany*, 1, 1–634, 10.5616/gg110001, 2011.
- Rivkin, F., Vlasova, J., Popova, A., Mazhitova, G., Kuhry, P., Parmuzin, I., and Chehina, I.: Mesoscale and detailed geocryological mapping as a basis for carbon budget assessment (East European Russian Arctic, CARBO-North project), *Proc. 9th Int. Conf. Permafrost*, 2008, 1493–1498,
- 20 Sannel, A. B. K., and Brown, I. A.: High-resolution remote sensing identification of thermokarst lake dynamics in a subarctic peat plateau complex, *Canadian Journal of Remote Sensing*, 36, S26–S40, 10.5589/m10-010, 2010.
- Sannel, A. B. K., and Kuhry, P.: Warming-induced destabilization of peat plateau/thermokarst lake complexes, *Journal of Geophysical Research*, 116, 10.1029/2010JG001635, 2011.
- Sellmann, P. V., and Brown, J.: Stratigraphy and diagenesis of perennially frozen sediments in the Barrow, Alaska, region, *Permafrost: North American Contribution to the Second International Conference*. Washington, DC: National Academy of Sciences, 1973, 171–181,
- 25 Sjöberg, Y., Hugelius, G., and Kuhry, P.: Thermokarst lake morphometry and erosion features in two peat plateau areas of northeast European Russia, *Permafr. Periglac. Proc.*, 24, 75–81, 2013.
- Stolbovoi, V., and McCallum, I.: Land Resources of Russia, International Institute for Applied Systems Analysis and the Russian Academy of Science, Laxenburg, Austria, 2002.
- 30 Taylor, A., and Judge, A. S.: Measurement and prediction of permafrost thickness, Arctic Canada, Energy, Mines and Resources Canada, Earth Physics Branch, 1981.
- Walker, D. A., Webber, P. J., Walker, M. D., Lederer, N. D., Meehan, R. H., and Nordstrand, E. A.: Use of geobotanical maps and automated mapping techniques to examine cumulative impacts in the Prudhoe Bay Oilfield, Alaska, *Environ. Conserv.*, 13, 149–160, 1986.
- 35 Walvoord, M. A., Voss, C. I., and Wellman, T. P.: Influence of permafrost distribution on groundwater flow in the context of climate-driven permafrost thaw: Example from Yukon Flats Basin, Alaska, United States, *Water Resour. Res.*, 48, 2012.
- Widhalm, B., Hogström, E., Ressler, C., Trofaier, A., Heim, B., Biasi, C., and Bartsch, A.: PAGE21 WP5-Land surface hydrology from remotely sensed data at PAGE21 sites, Department of Geodesy and Geoinformation (GEO), Research Groups Photogrammetry and Remote Sensing, Vienna University of Technology, Vienna, Austria, 15, 2014a.
- 40 Yershov, E. D., Kondrat'yeva, K. A., KLoginov, V. F., and Sychev, I. K.: Geocryological Map of Russia and Neighbouring Republics, Faculty of Geology, Chair of Geocryology, Lomonosov Moscow State University, 1991.
